# Supplementary material for: l-Tyrosine loaded nanoparticles: an efficient catalyst for the synthesis of dicoumarols and Hantzsch 1,4-dihydropyridines
Source: Royal Society of Chemistry journal article supplement (doi:10.1039/c4ra16627b), 2015-01-01
Supplement: c4ra16627b2.pdf [file c4ra16627b2.pdf]

Supporting information (ES-2)

**L-tyrosine loaded nanoparticles: An efficient catalyst for synthesis of dicoumarols and Hantzsch 1,4-dihydropyridines.**

Anamika Khaskel,<sup>a</sup> Pranjit Barman<sup>a</sup> and Utpal Jana<sup>b</sup>

<sup>a</sup>Department of Chemistry, National Institute of Technology, Silchar 788010, Assam, India  
Fax +91(3842)224797; Email: [barmanpranjit@yahoo.co.in](mailto:barmanpranjit@yahoo.co.in)

<sup>b</sup>School of Pharmacy, Chouksey Engineering college, Masturi Road, NH-49, Bilaspur 495004

**Particle size Analysis of L- Tyrosine loaded-Nanoparticles**

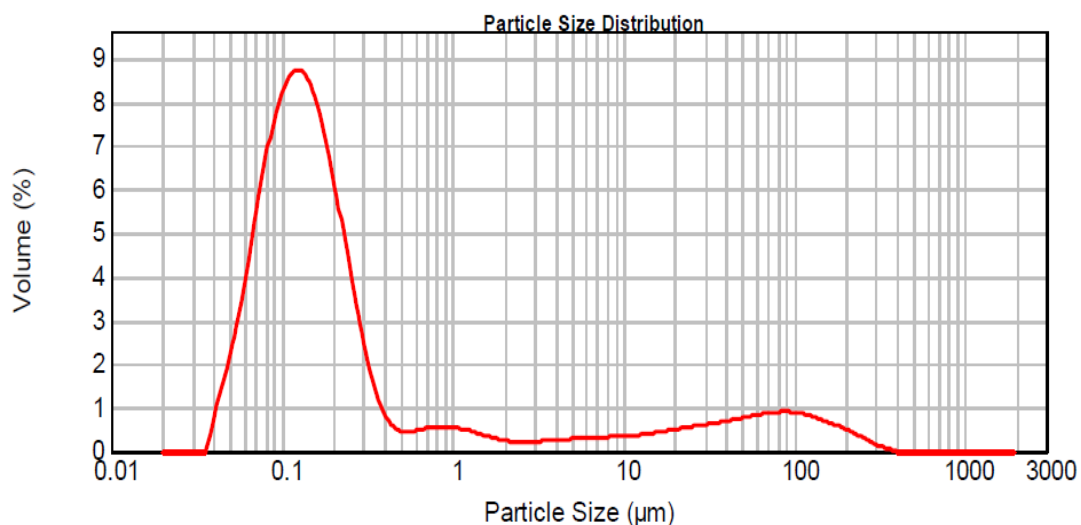

**TEM Image of L-Tyrosine loaded-nanoparticles (Average Size 50 nm)**

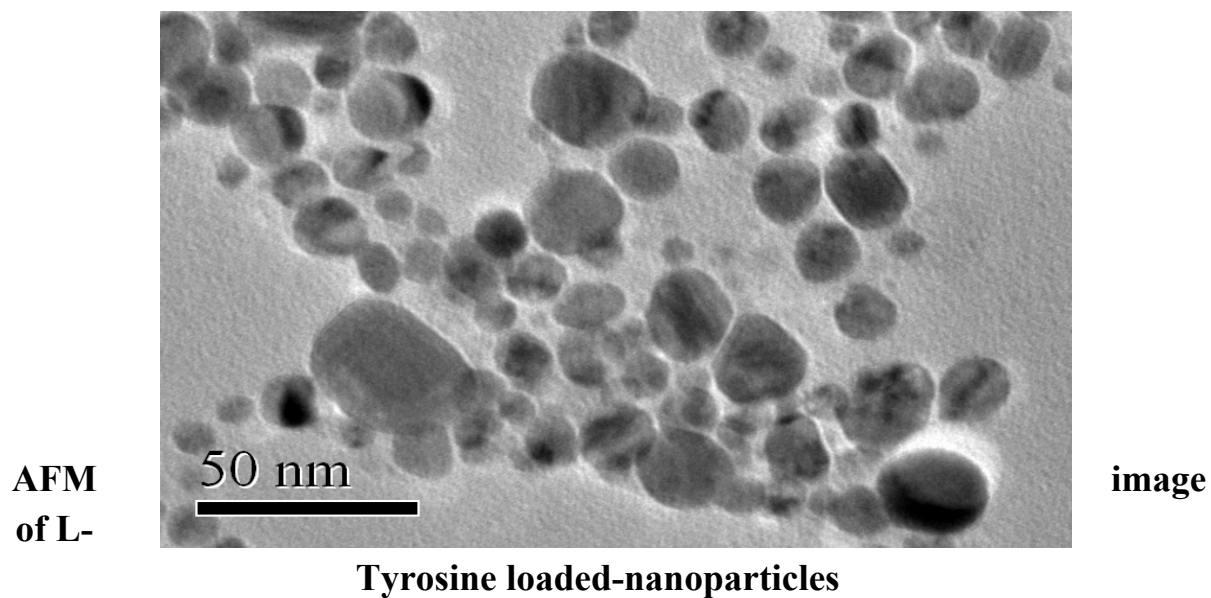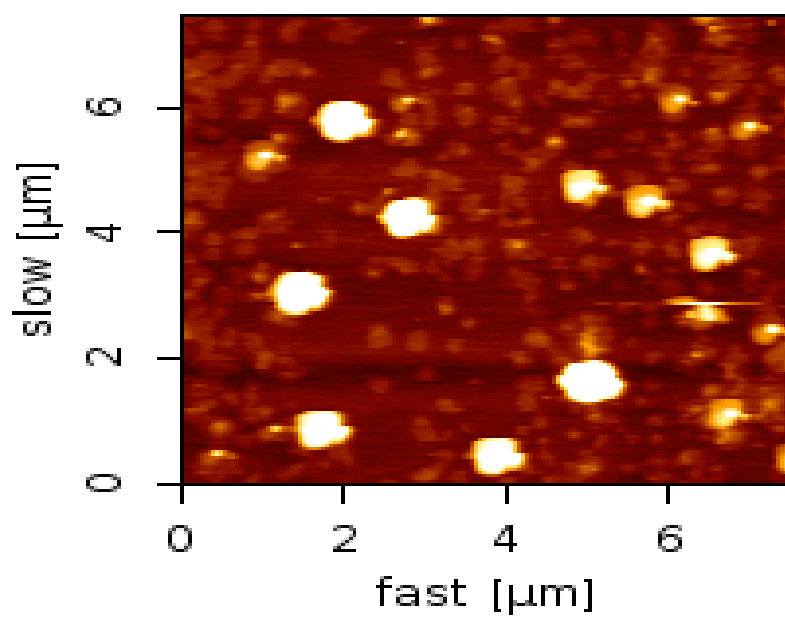

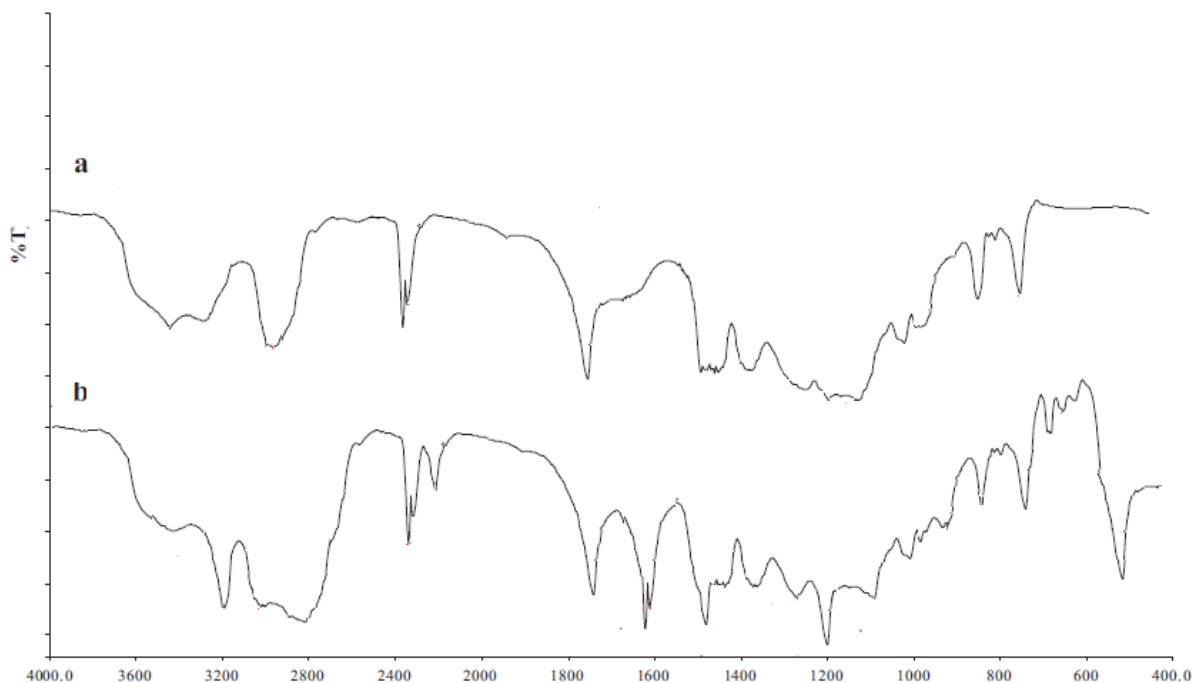

FT-IR spectra of (a) Eudragit RS 100 and (b) L-tyrosine loaded –Eudragit RS 100 nanoparticles.

IR spectrum of Eudragit RS 100 is given as (a) and L-tyrosine loaded-Eudragit RS 100 as (b).

Spectrum (a) shows very sharp peaks in 3429.9, 2953.8, 2360.5, 2342.6, 1734.4, 1458.4, 1388.2, 1247.0, 1149, 850.4, 752.2  $\text{cm}^{-1}$

When compared against the IR spectrum of (b) i.e the IR spectrum of L-tyrosine loaded nanoparticle shows a number of bands not present in the earlier one (in a). These new bands were found to correspond very closely to a number of fundamental vibrational modes of L-tyrosine. The extra bands in trace - b against the vibrational modes of L-tyrosine are given in the following table:

| Serial No | Wavenumber ( $\text{cm}^{-1}$ ) | Vibrational mode |
|-----------|---------------------------------|------------------|
| 1         | 3200.9                          | Amide A band     |
| 2         | 2803.0                          | C-H stretching   |

---

|   |        |                                      |
|---|--------|--------------------------------------|
| 3 | 1640.5 | amide-I band                         |
| 4 | 1500.2 | ring vibration of the phenyl group   |
| 5 | 1200   | C-O stretching of the phenolic group |
