# Supplementary material for: l-Tyrosine loaded nanoparticles: an efficient catalyst for the synthesis of dicoumarols and Hantzsch 1,4-dihydropyridines
Source: Royal Society of Chemistry journal article supplement (doi:10.1039/c4ra16627b), 2015-01-01
Supplement: c4ra16627b3.pdf [file c4ra16627b3.pdf]

Supporting information (ES-3)

**L-tyrosine loaded nanoparticles: An efficient catalyst for synthesis of dicoumarols and Hantzsch 1,4-dihydropyridines.**

Anamika Khaskel,<sup>a</sup> Pranjit Barman<sup>a</sup> and Utpal Jana<sup>b</sup>

<sup>a</sup>Department of Chemistry, National Institute of Technology, Silchar 788010, Assam, India  
Fax +91(3842)224797; Email: [barmanpranjit@yahoo.co.in](mailto:barmanpranjit@yahoo.co.in)

<sup>b</sup> School of Pharmacy, Chouksey Engineering college, Lal Khadan, NH-49, Bilaspur 495004

Table-1 Melting point of the dicoumarols (3a-3j)

| Entry | Compound | M.P (°C) |
|-------|----------|----------|
| 1     | 3a       | 244      |
| 2     | 3b       | 230      |
| 3     | 3c       | 232      |
| 4     | 3d       | 250      |
| 5     | 3e       | 225      |
| 6     | 3f       | 127      |
| 7     | 3g       | 241      |
| 8     | 3h       | 278      |
| 9     | 3i       | 213      |
| 10    | 3j       | 270      |

Table-2 Melting point of Hantzsch 1,4-DHPs (5a-5o)

| Entry | Compound | M.P ((°C) |
|-------|----------|-----------|
| 1     | 5a       | 163       |
| 2     | 5b       | 160       |
| 3     | 5c       | 227       |
| 4     | 5d       | 248       |
| 5     | 5e       | 233       |
| 6     | 5f       | 174       |
| 7     | 5g       | 144       |
| 8     | 5h       | 175       |
| 9     | 5i       | 102       |

|    |    |     |
|----|----|-----|
| 10 | 5j | 198 |
| 11 | 5k | 287 |
| 12 | 5l | 158 |
| 13 | 5m | 173 |
| 14 | 5n | 198 |
| 15 | 5o | 200 |

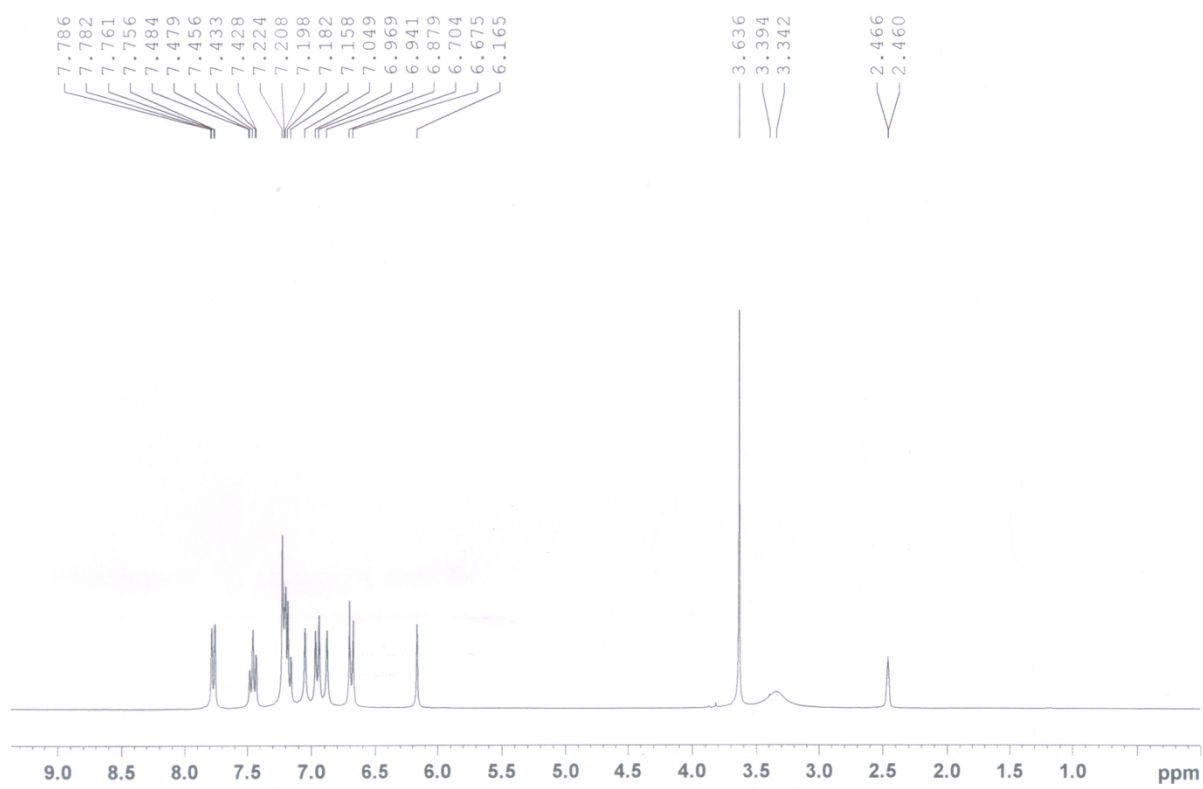

<sup>1</sup>H NMR of compound 3a

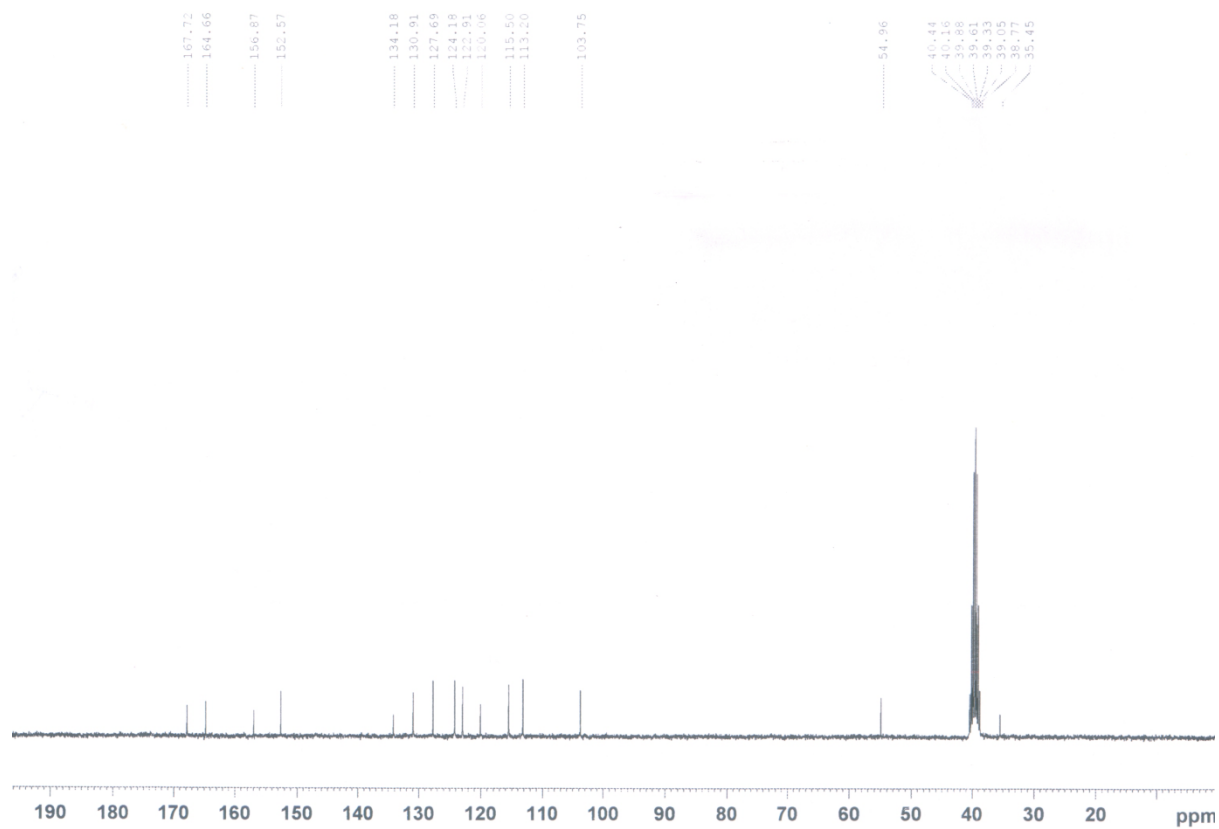

<sup>13</sup>C NMR of compound 3a

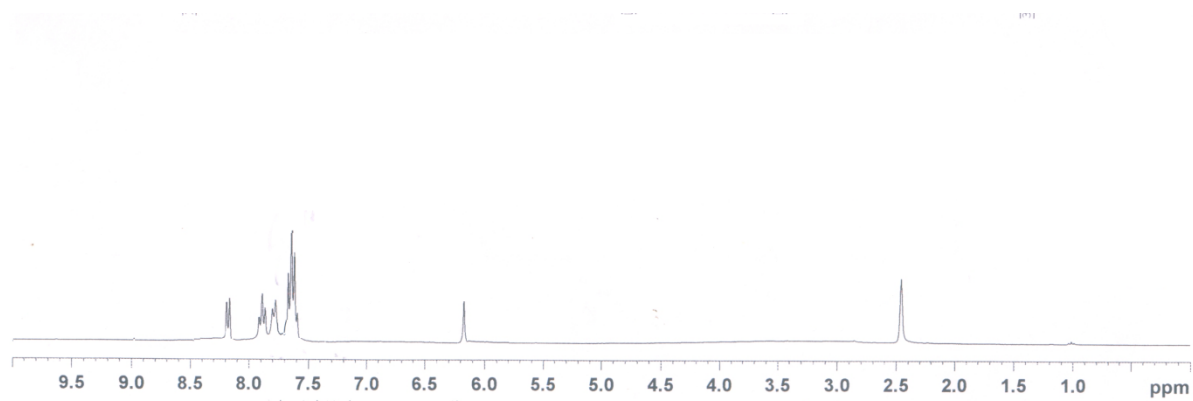

<sup>1</sup>H NMR of compound 3b

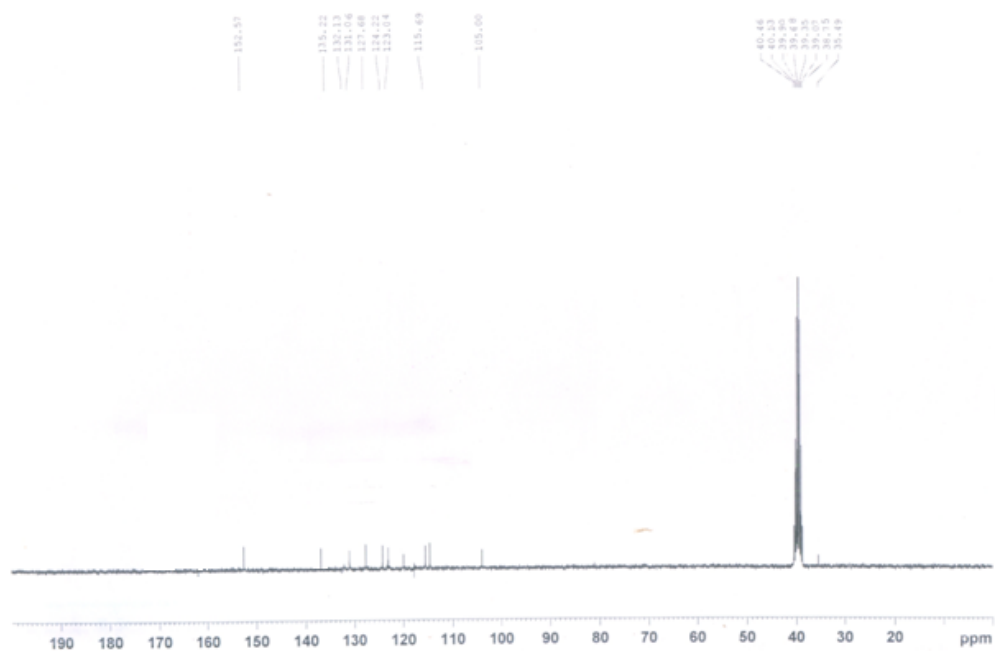

<sup>13</sup>C NMR of compound 3b

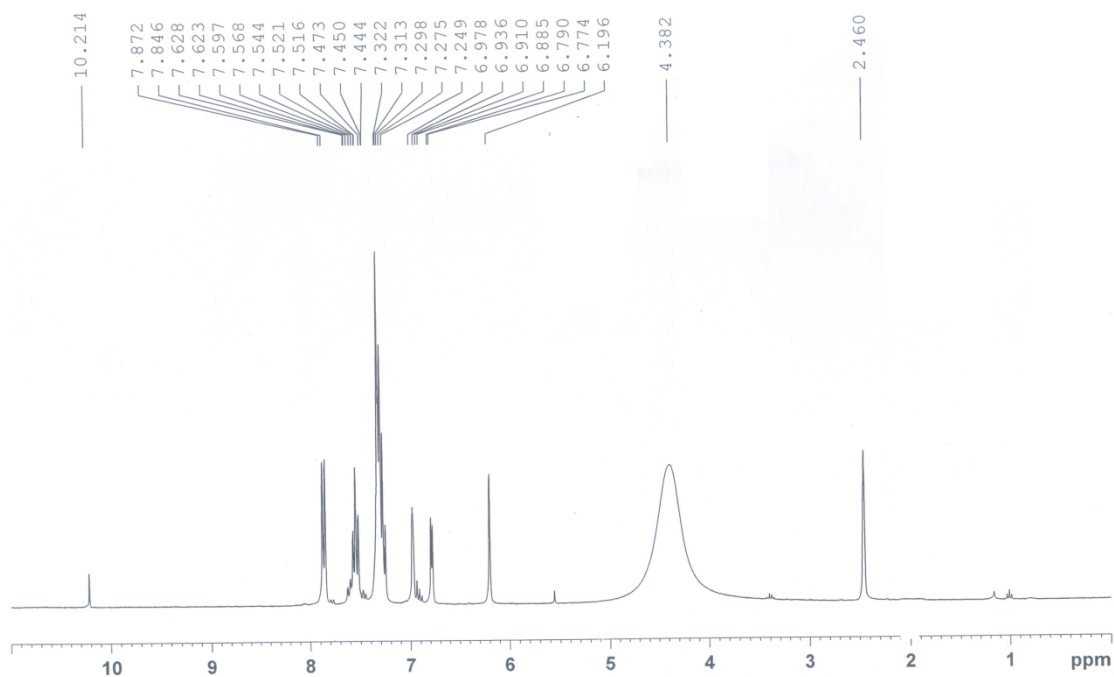

<sup>1</sup>H NMR of compound 3c



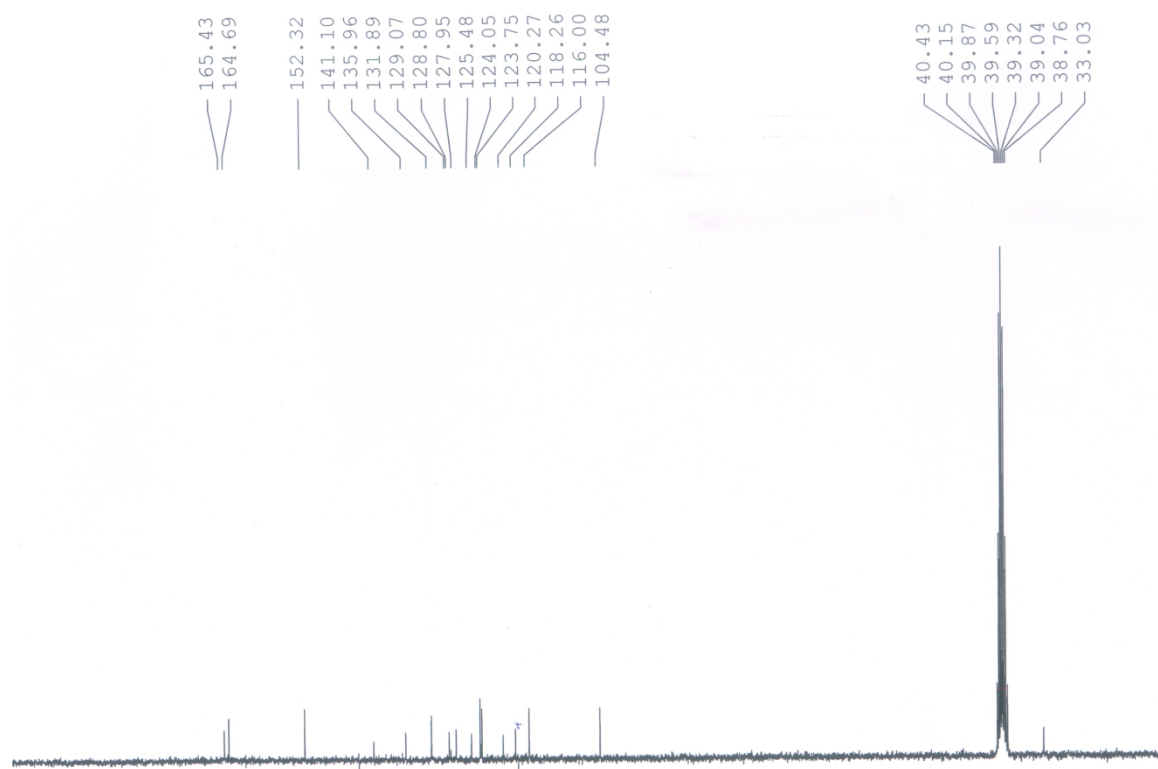

<sup>13</sup>C NMR of compound 3c

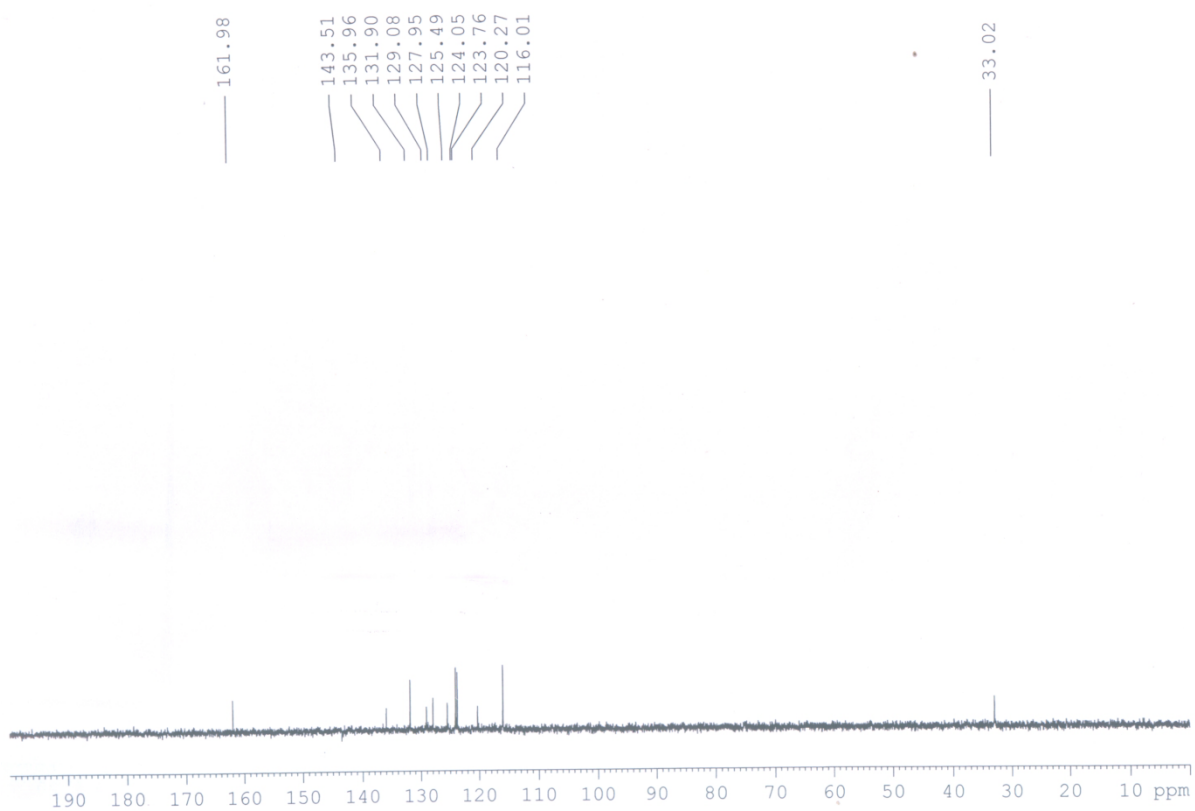

## DEPT NMR of compound 3c

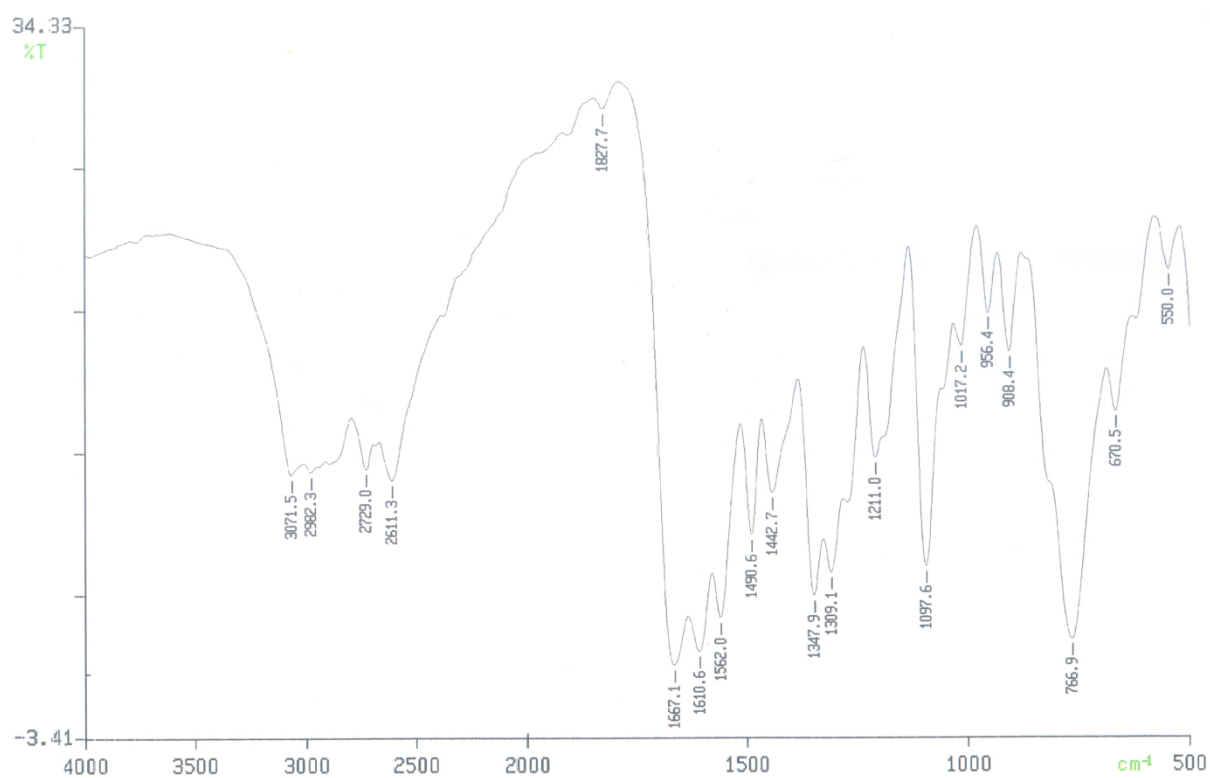

## FT-IR of compound 3d

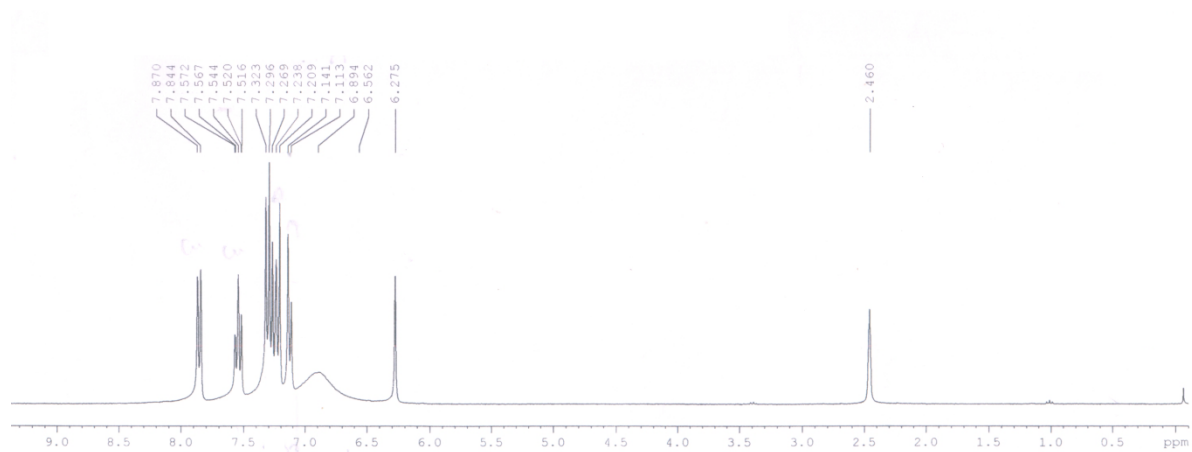 $^1\text{H}$  NMR of compound 3d

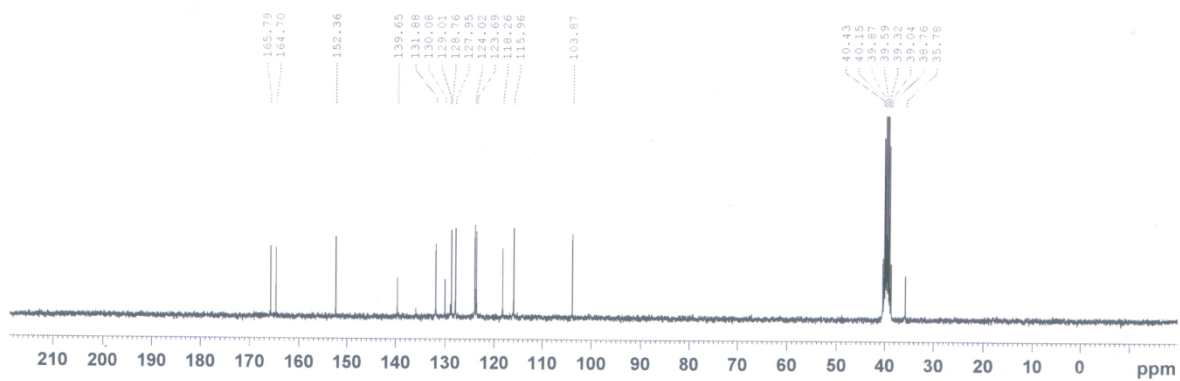

<sup>13</sup>C NMR of compound 3d

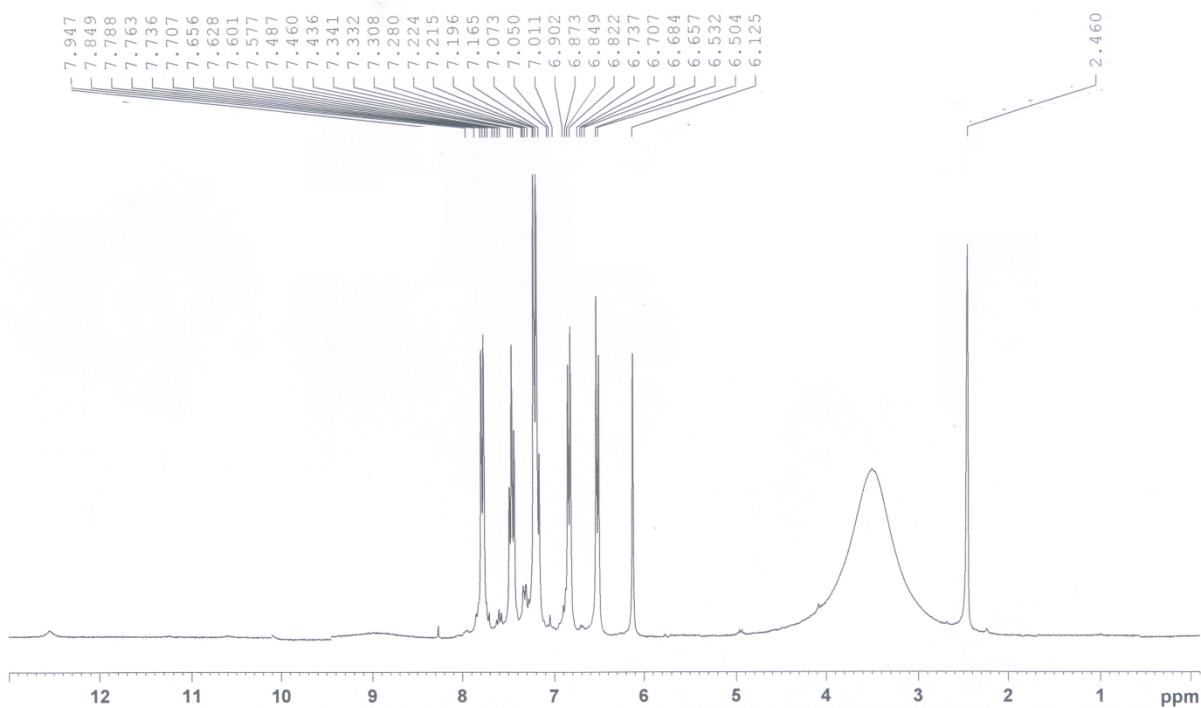

<sup>1</sup>H NMR of compound 3e

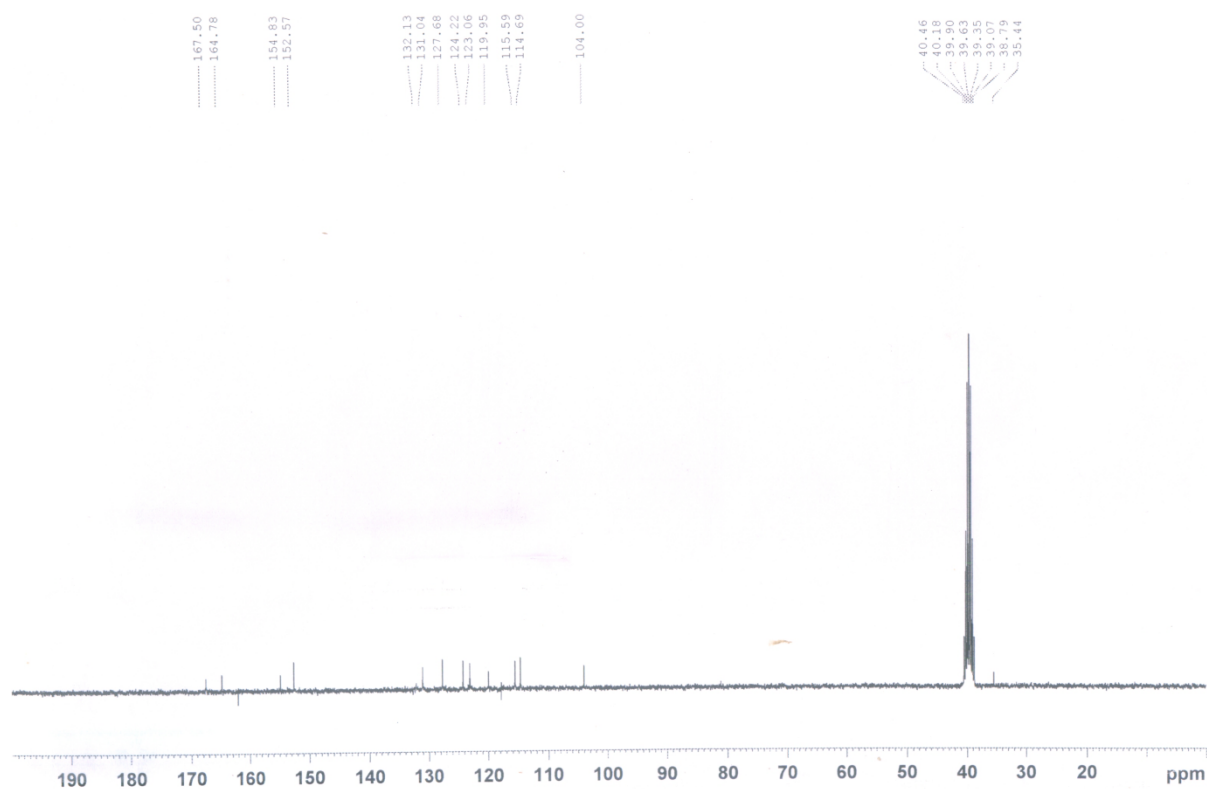

<sup>13</sup>C NMR of compound 3e

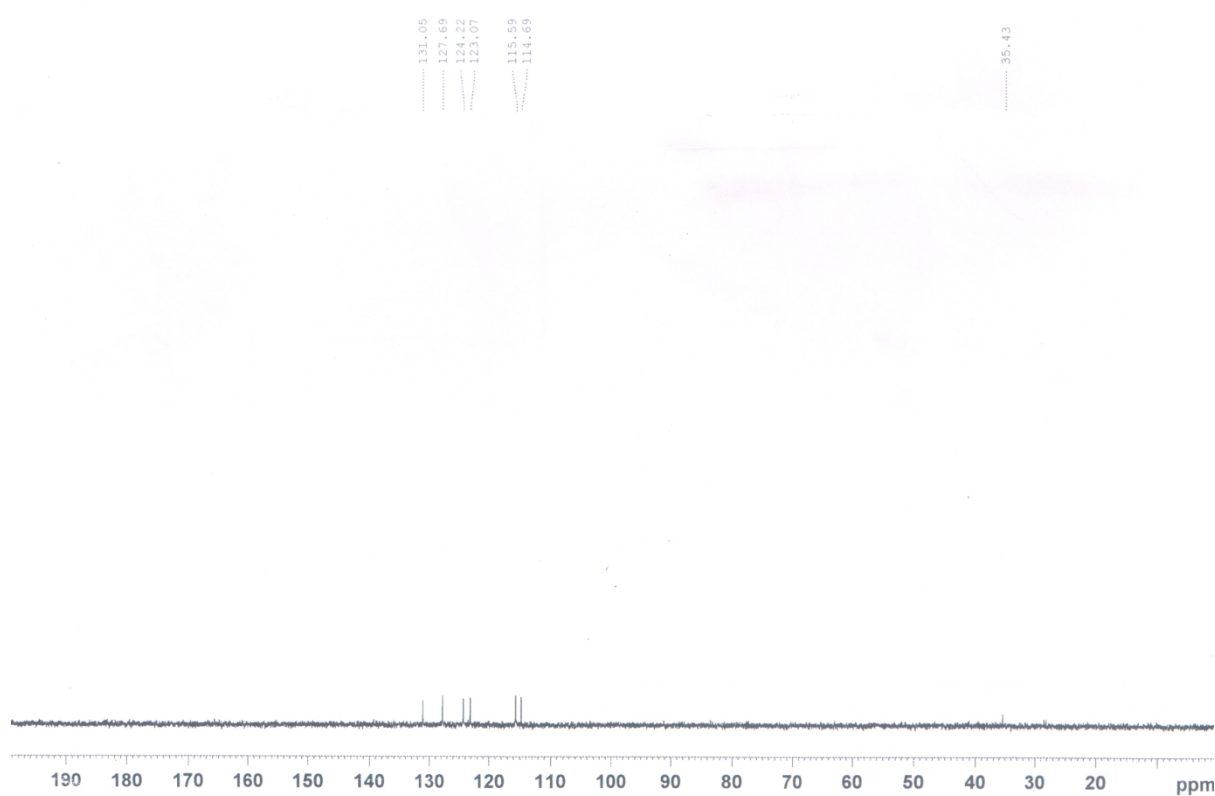

## DEPT NMR of compound 3e

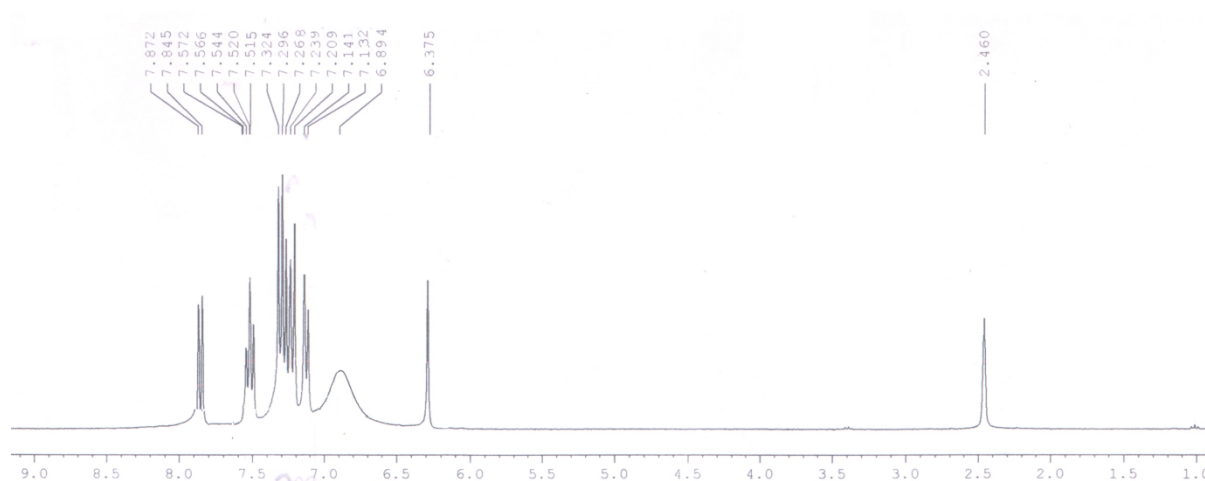 $^1\text{H}$  NMR of compound 3f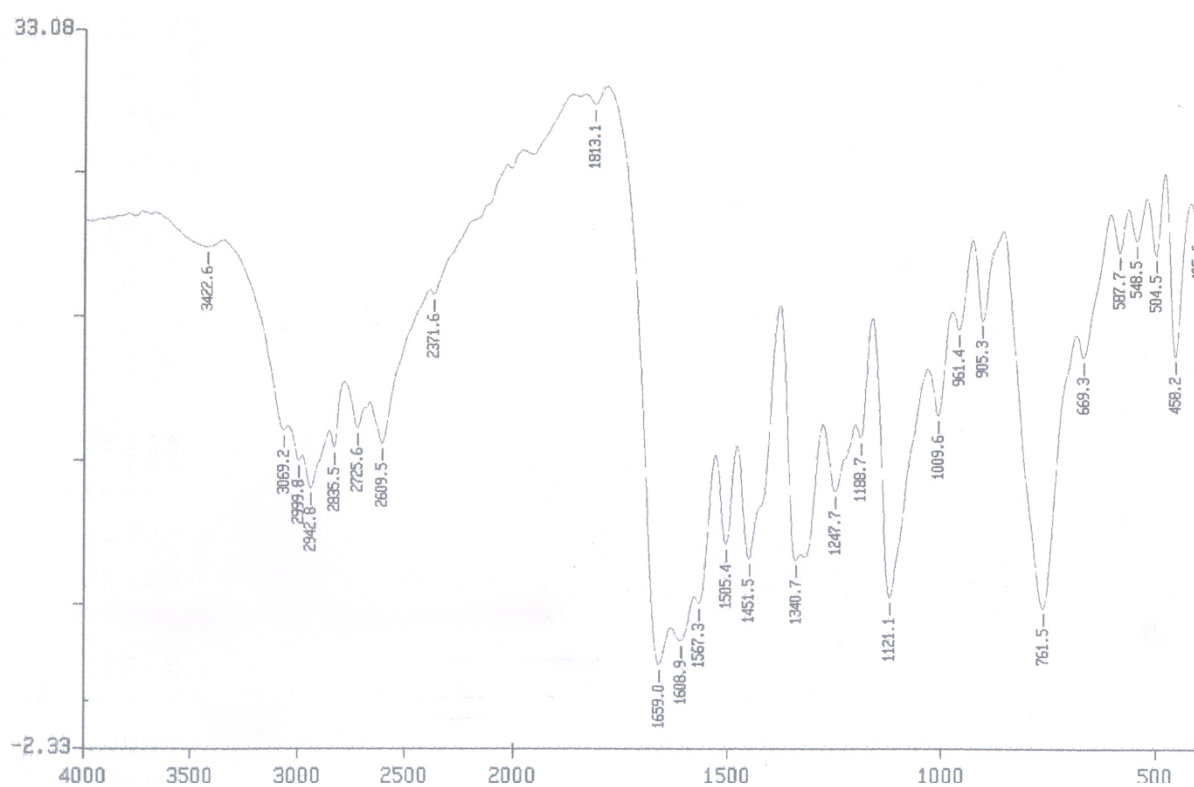

## FT-IR of compound 3g

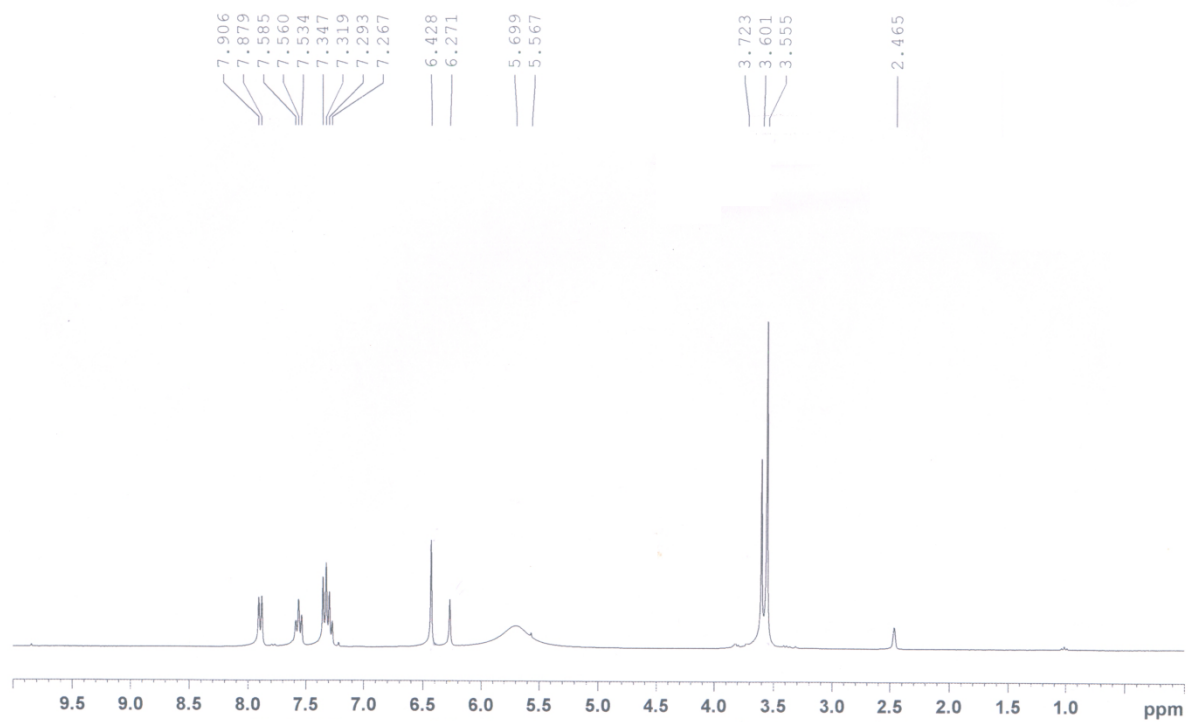

<sup>1</sup>H NMR of compound 3g

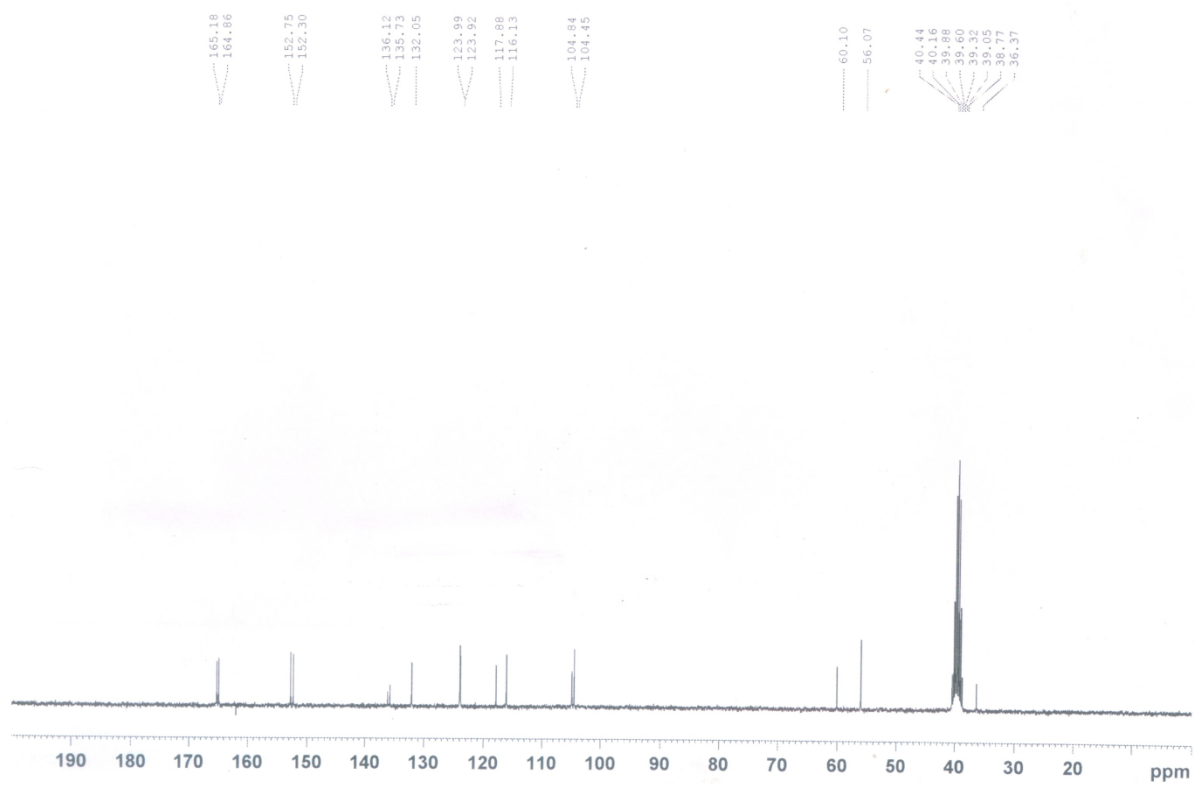

<sup>13</sup>C NMR of compound 3g.

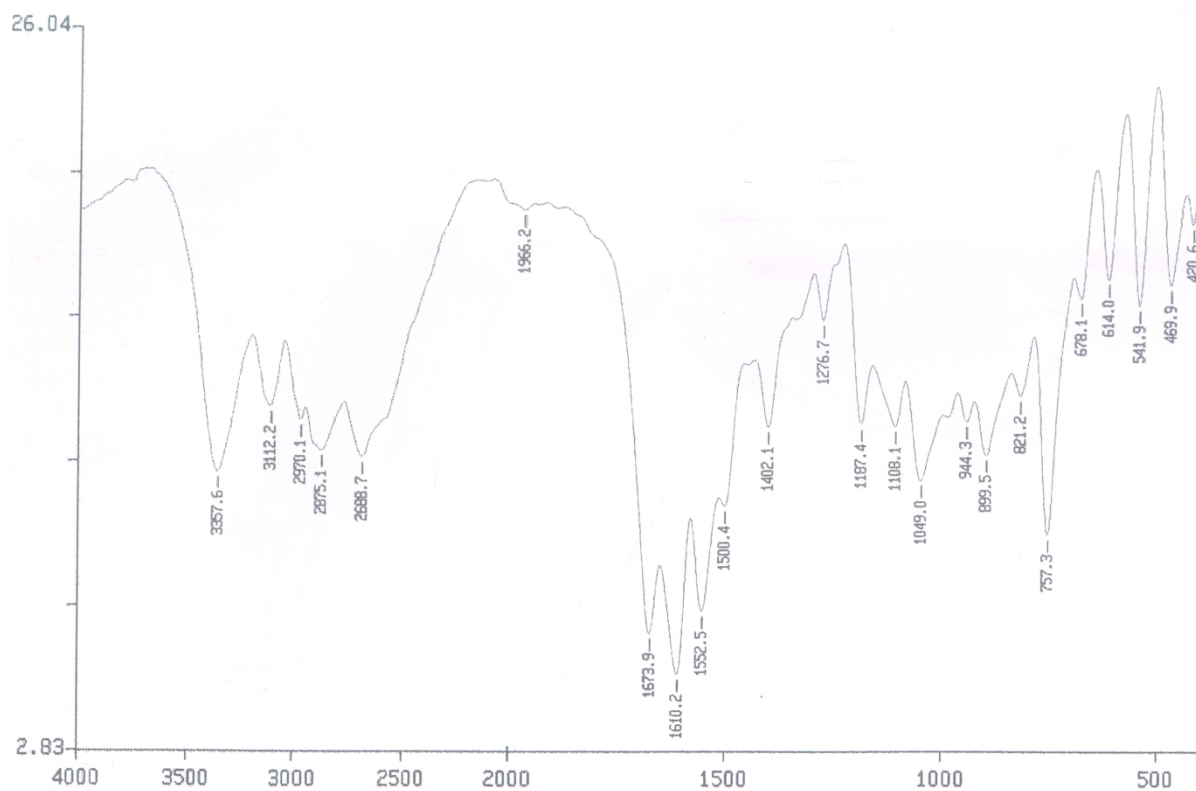

FT-IR of compound 3h.

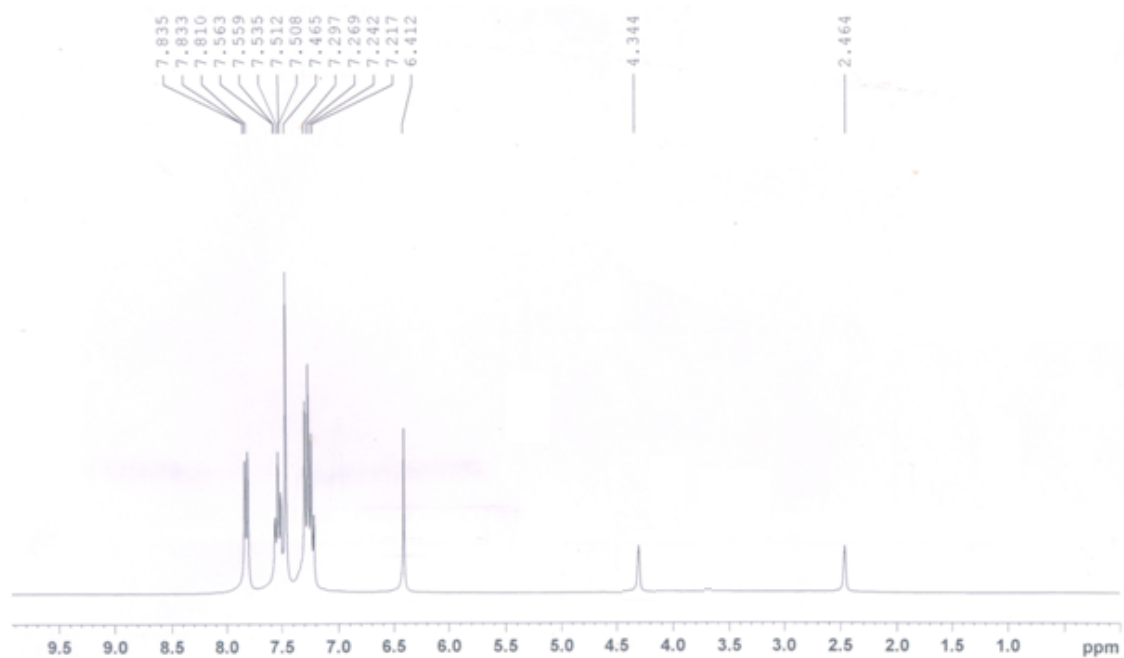

$^1\text{H}$  NMR of compound 3h

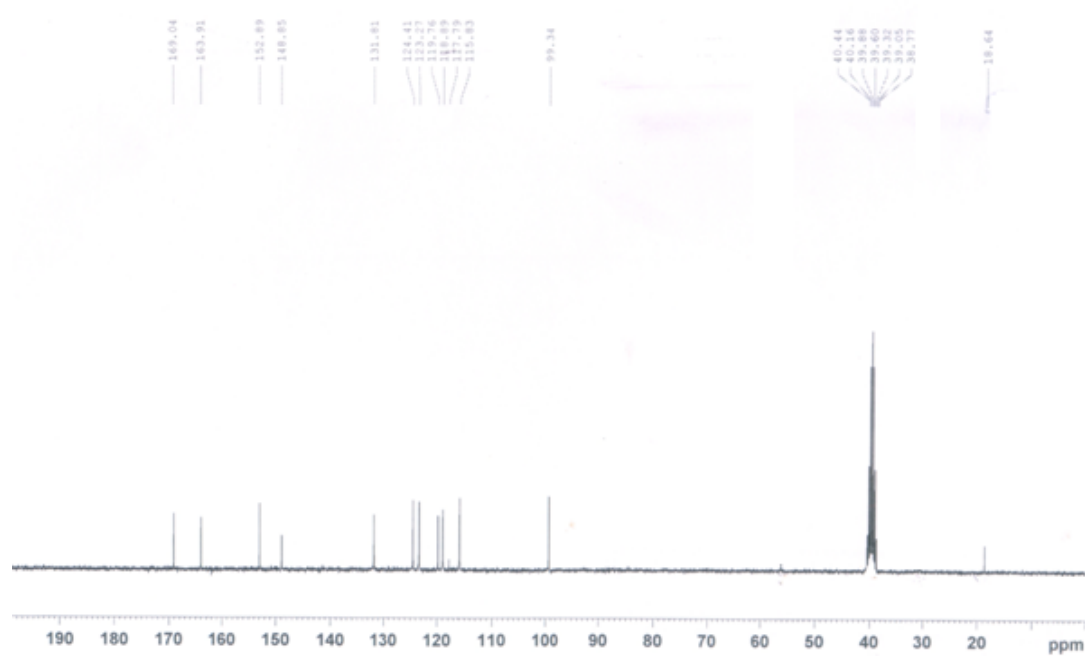

$^{13}\text{C}$  NMR of compound 3h



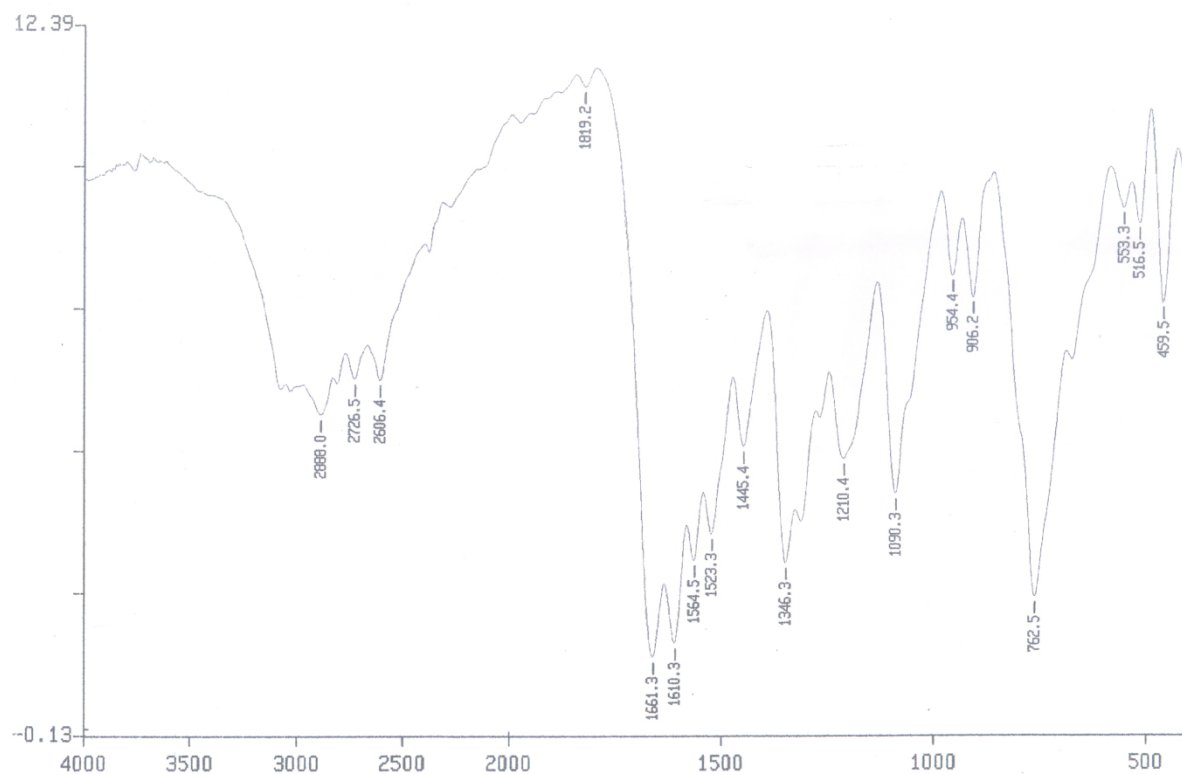

FT-IR of compound 3i

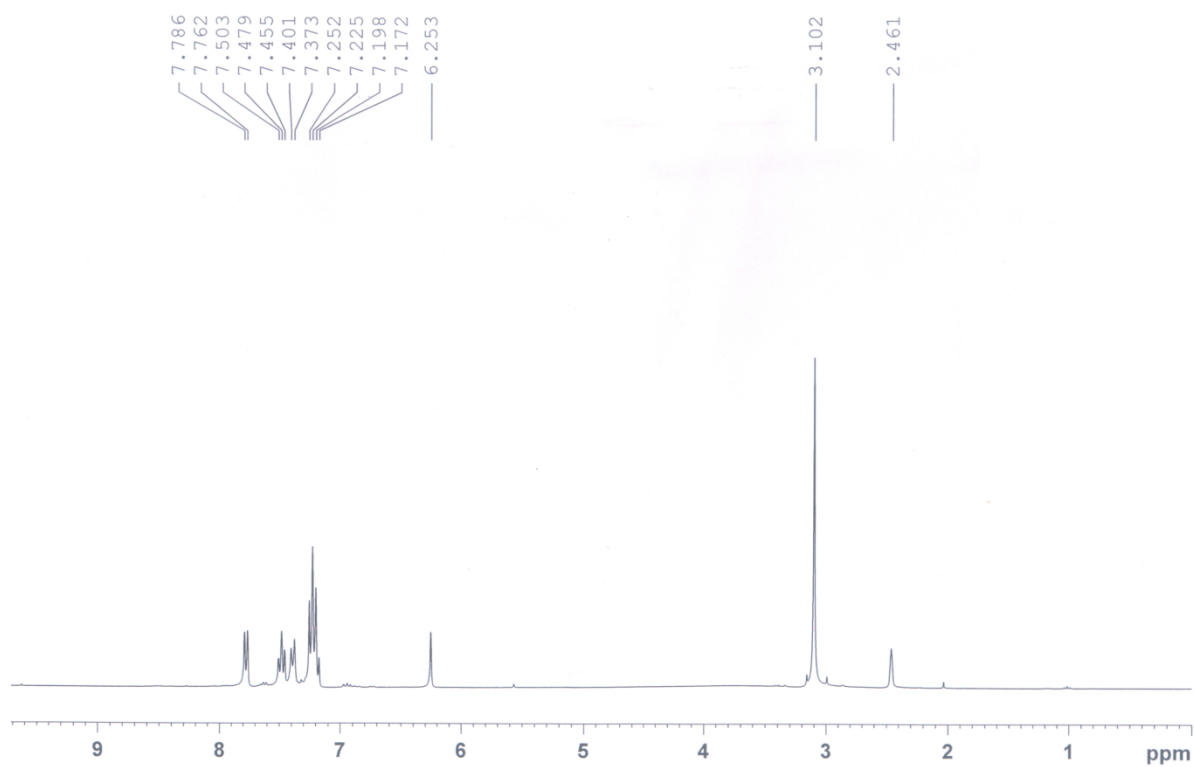

$^1\text{H}$  NMR of compound 3i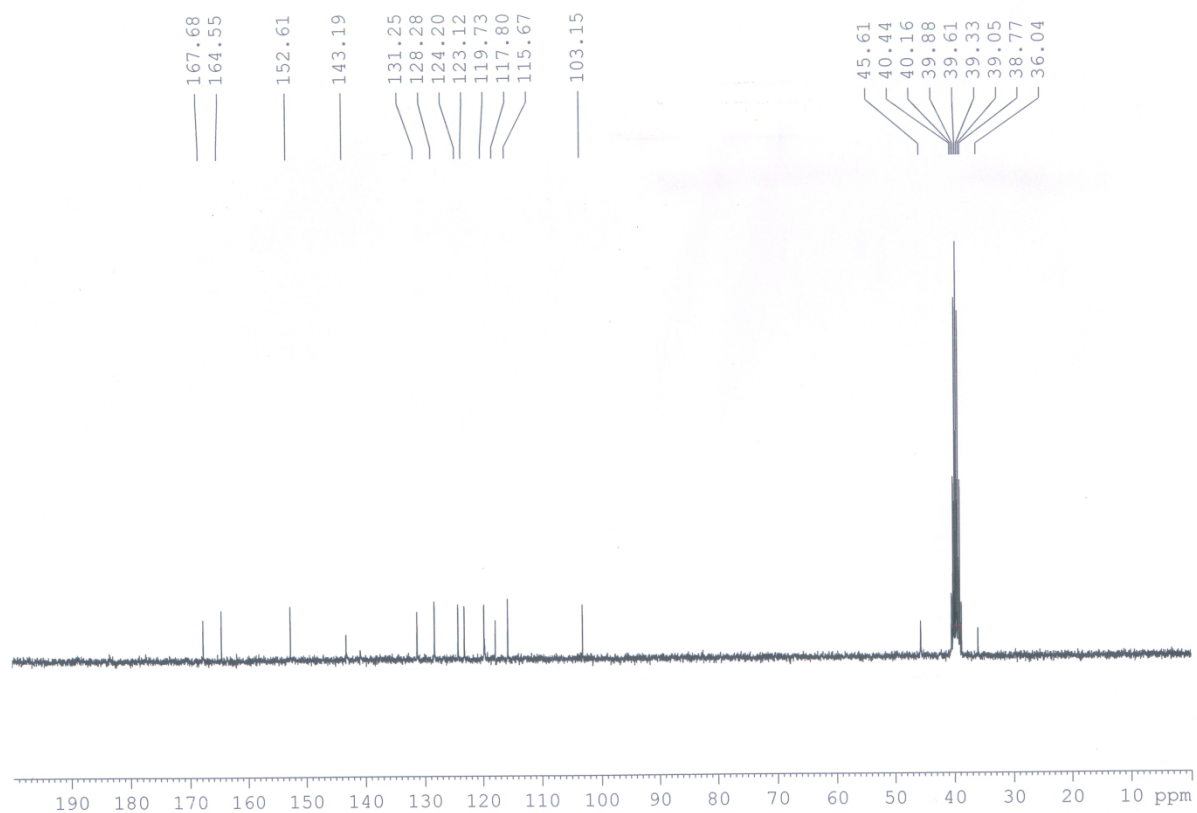 $^{13}\text{C}$  NMR of compound 3i

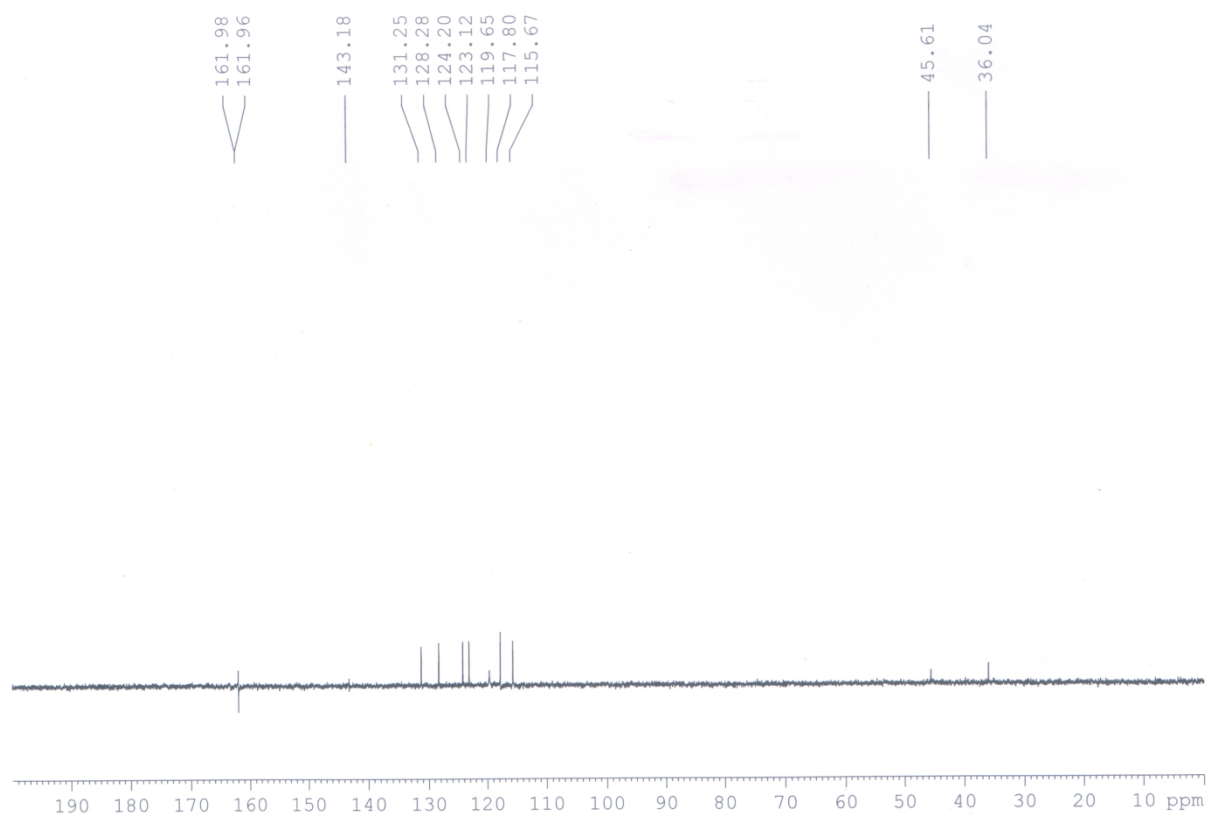

DEPT NMR of compound 3i

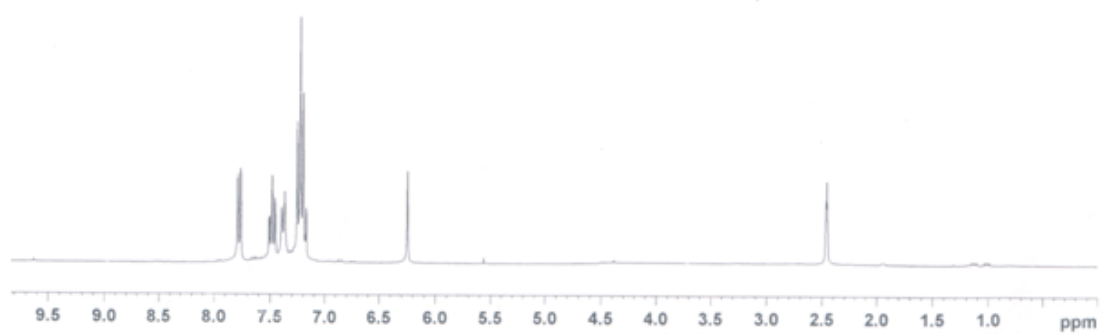<sup>1</sup>H NMR of compound 3j

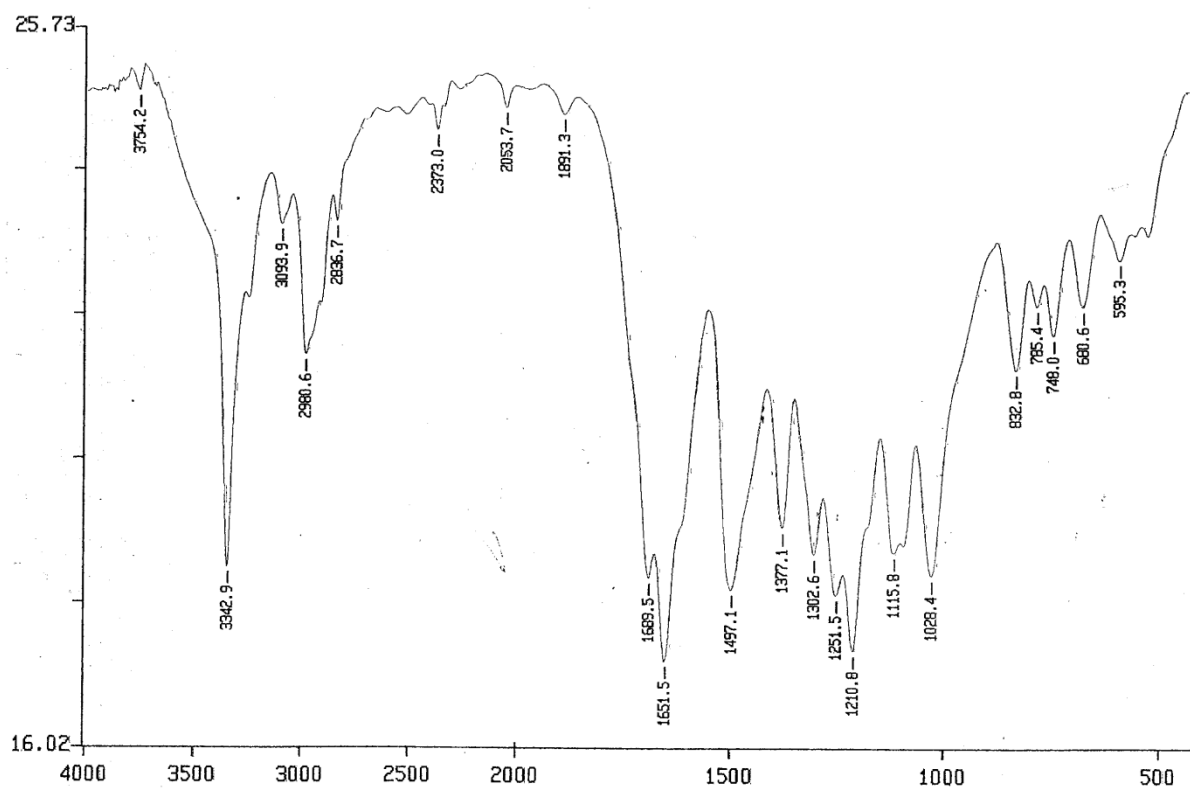

FT-IR of compound 5a

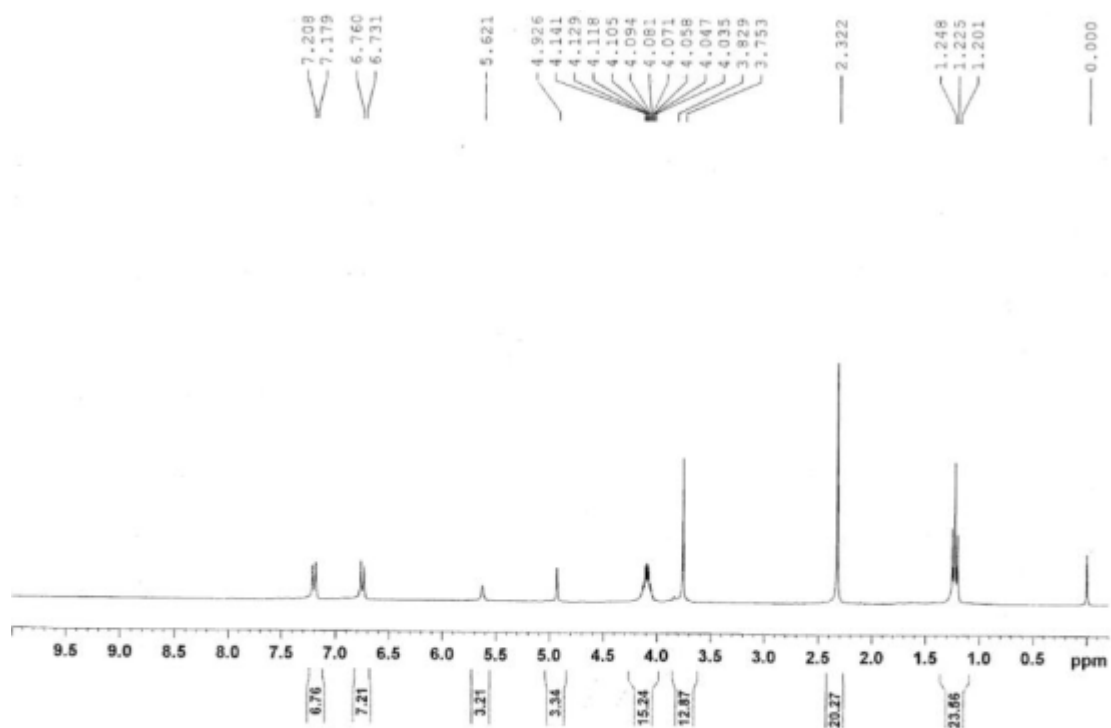<sup>1</sup>H NMR of compound 5a

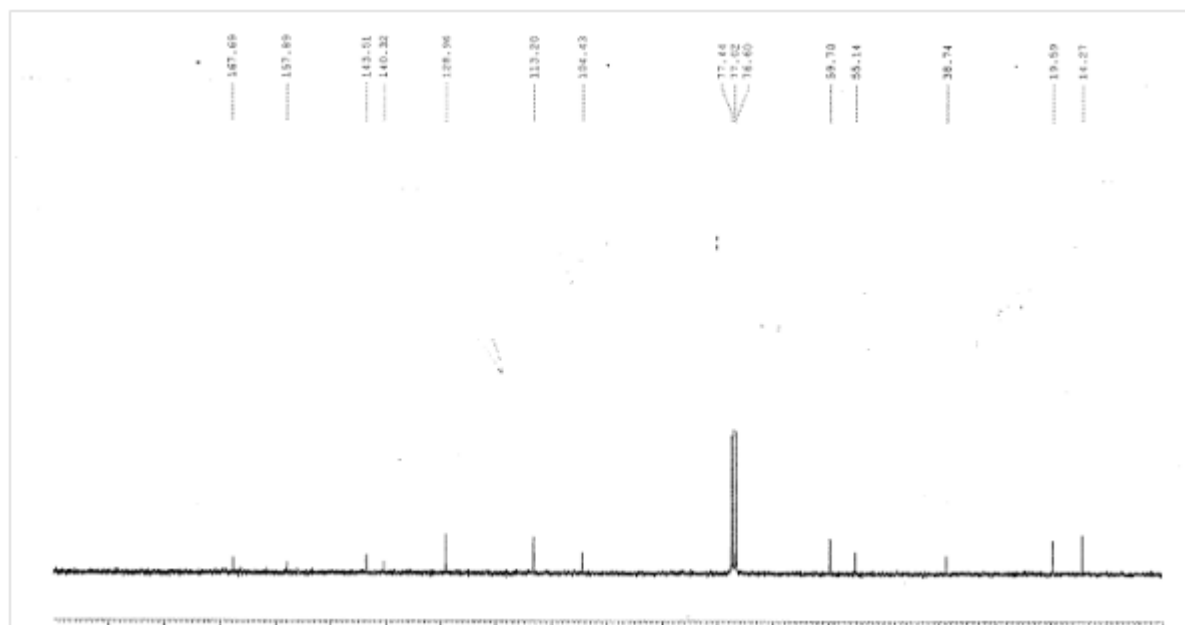

<sup>13</sup>C NMR of compound 5a.

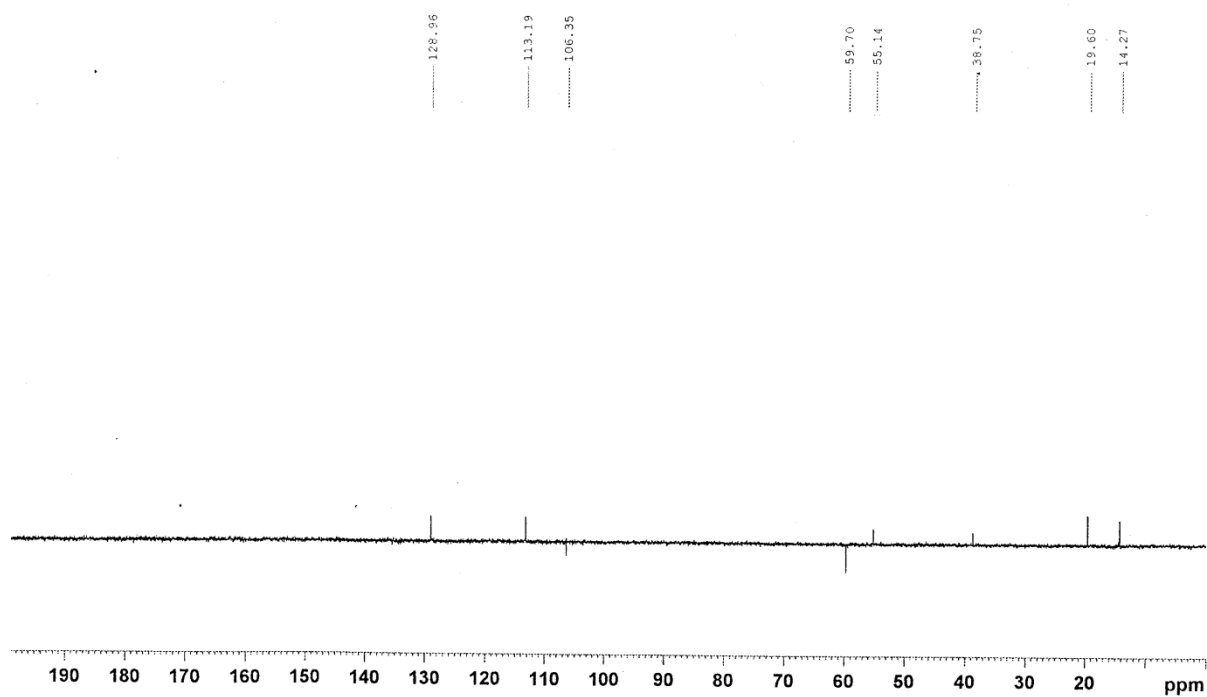

DEPT NMR of compound 5a

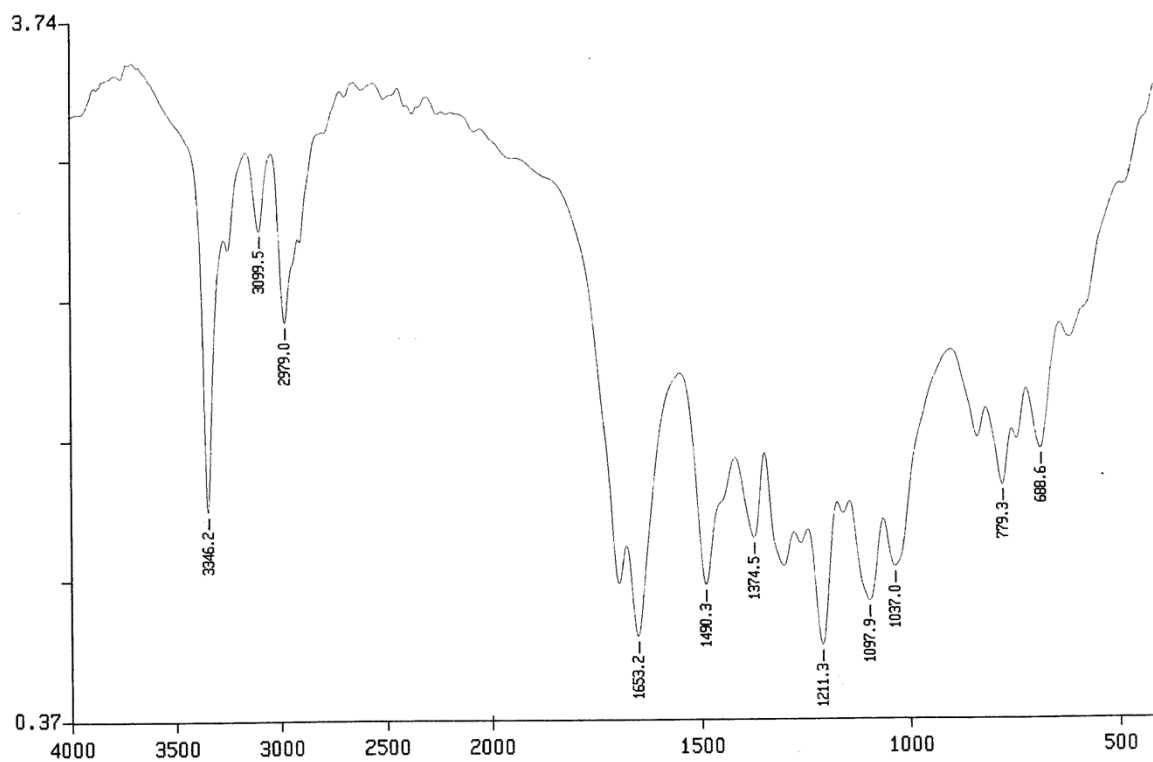

FT-IR of compound 5b

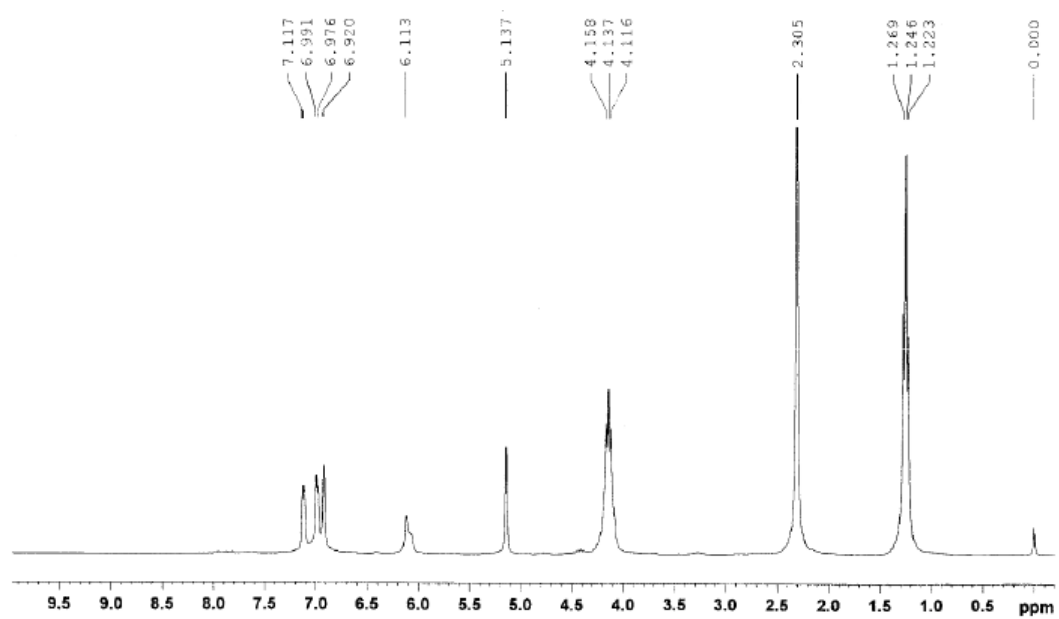<sup>1</sup>H NMR of compound 5b

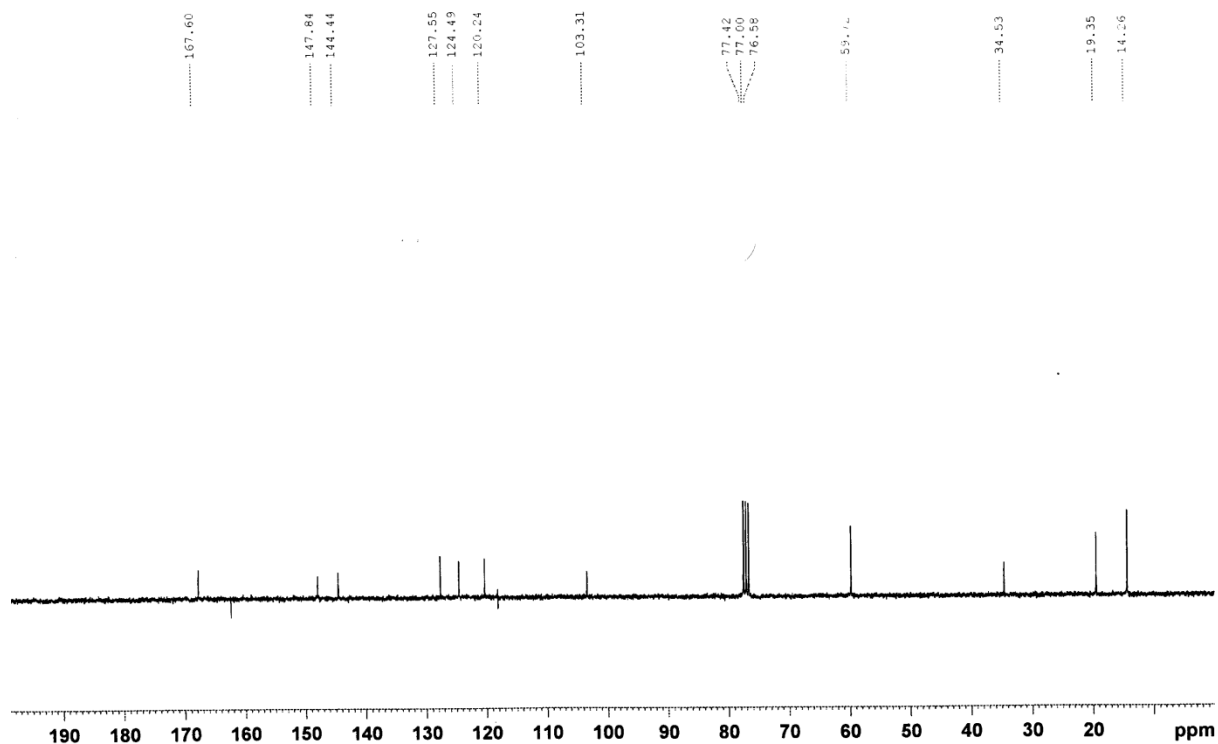

$^{13}\text{C}$  NMR of compound 5b.

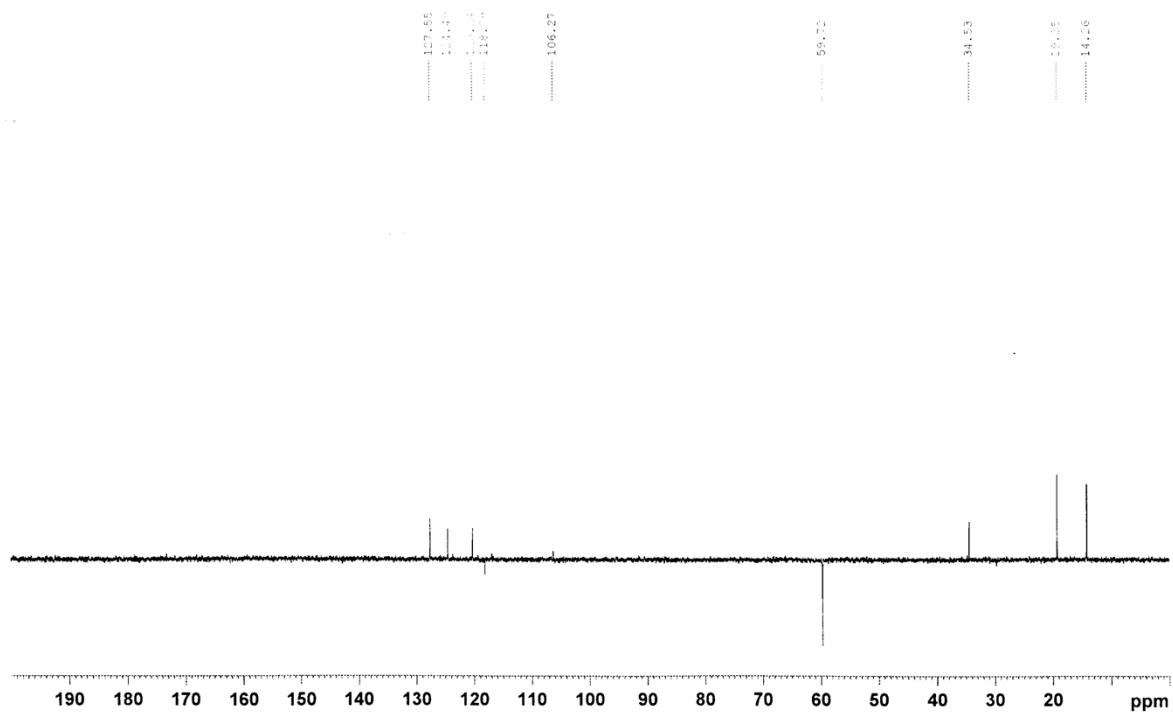

DEPT NMR of compound 5b

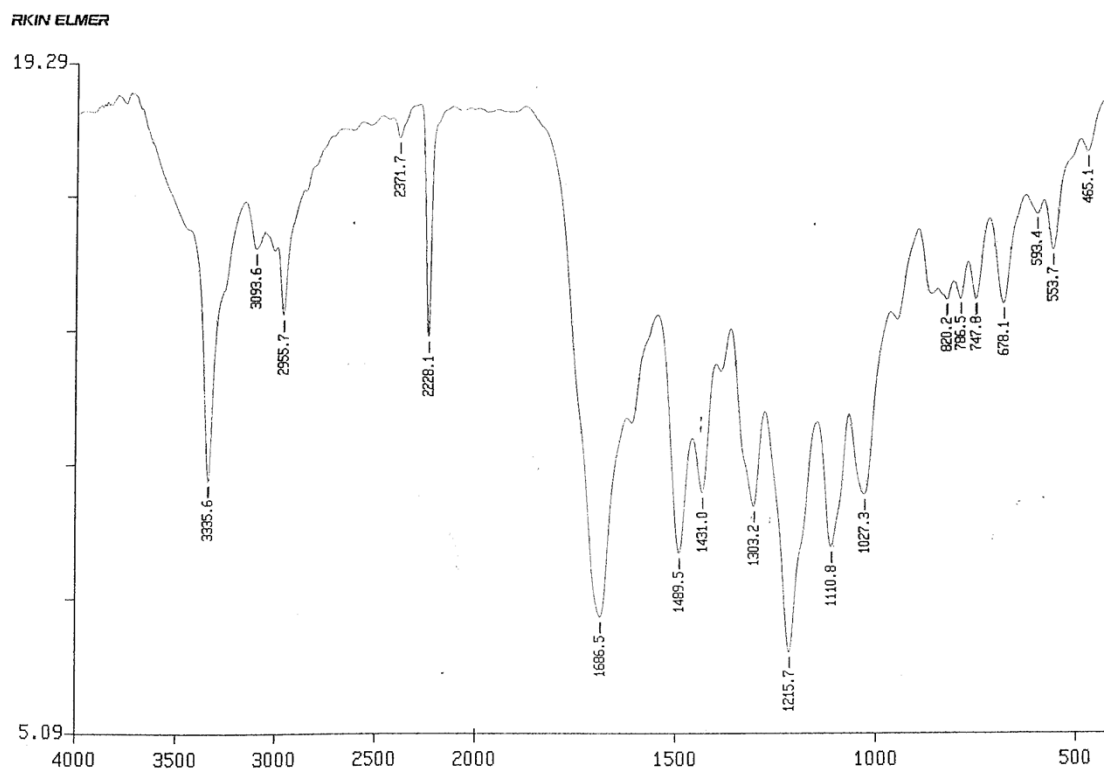

FT-IR of compound 5c

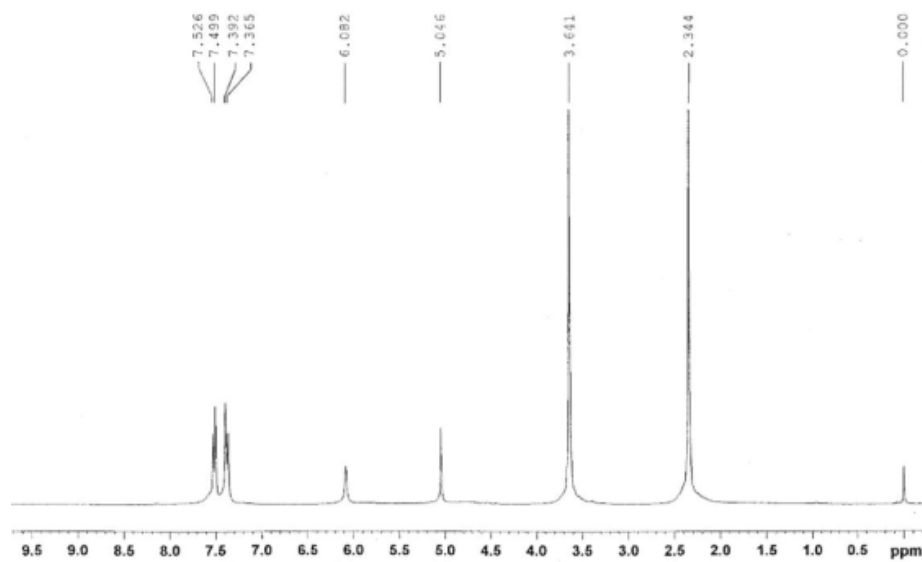<sup>1</sup>H NMR of compound 5c



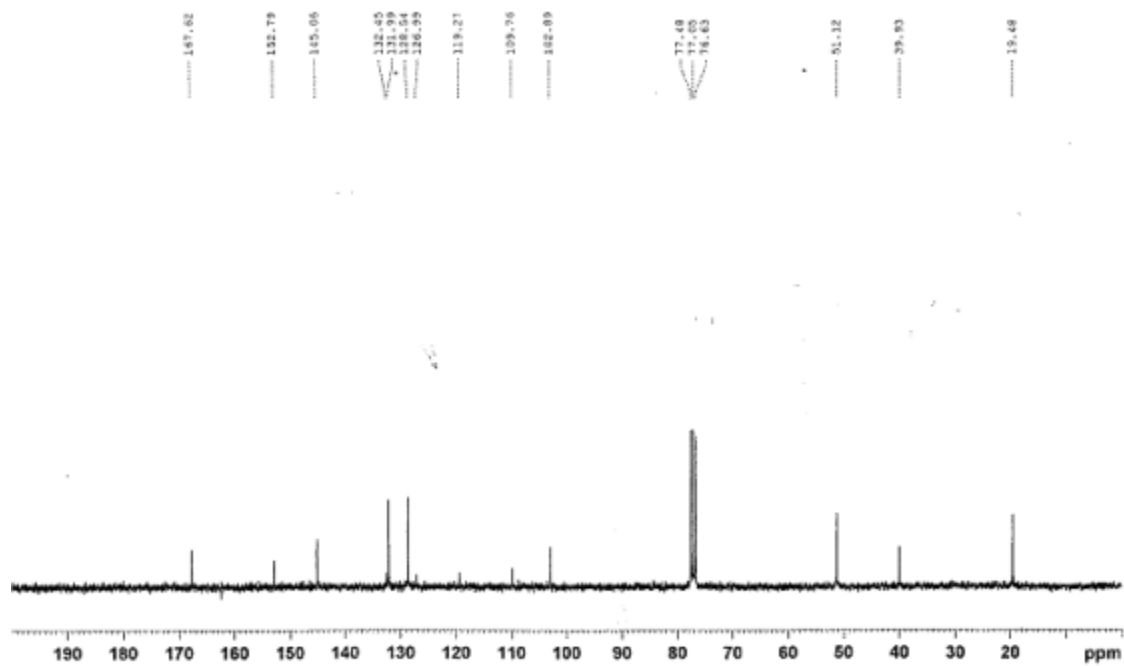

<sup>13</sup>C NMR of compound 5c

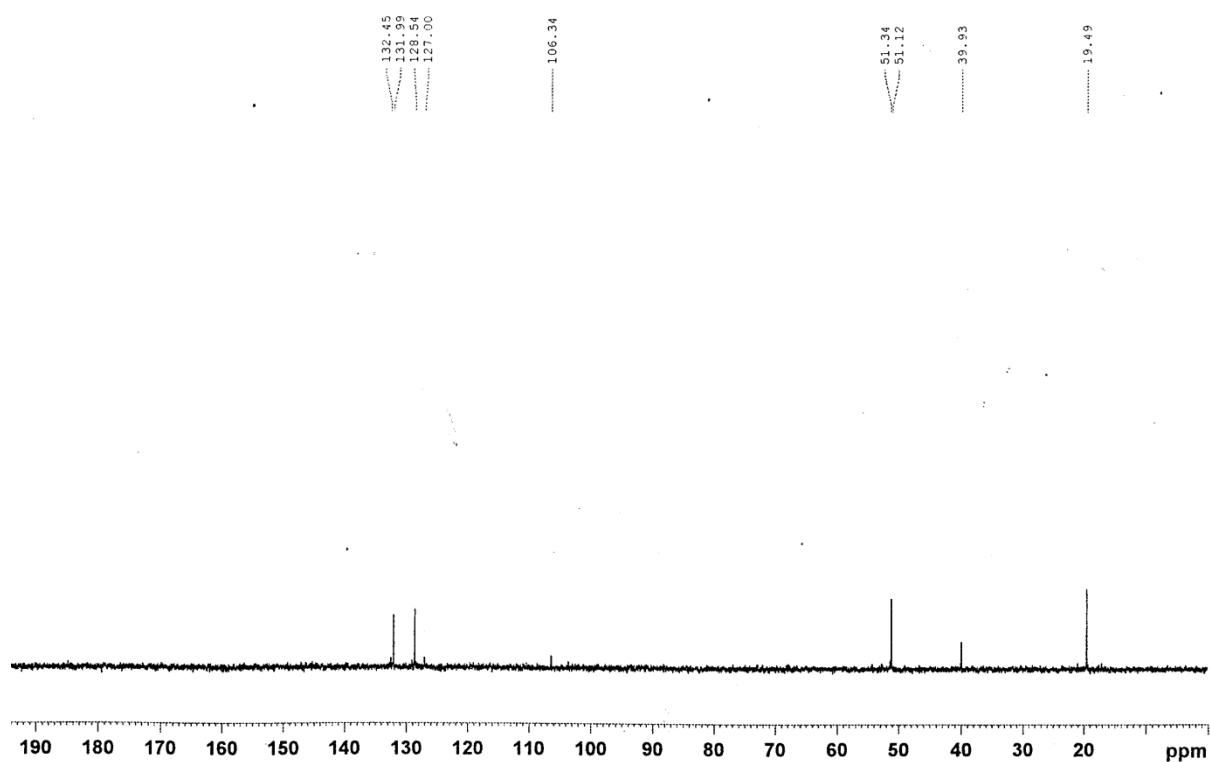

DEPT NMR of compound 5c

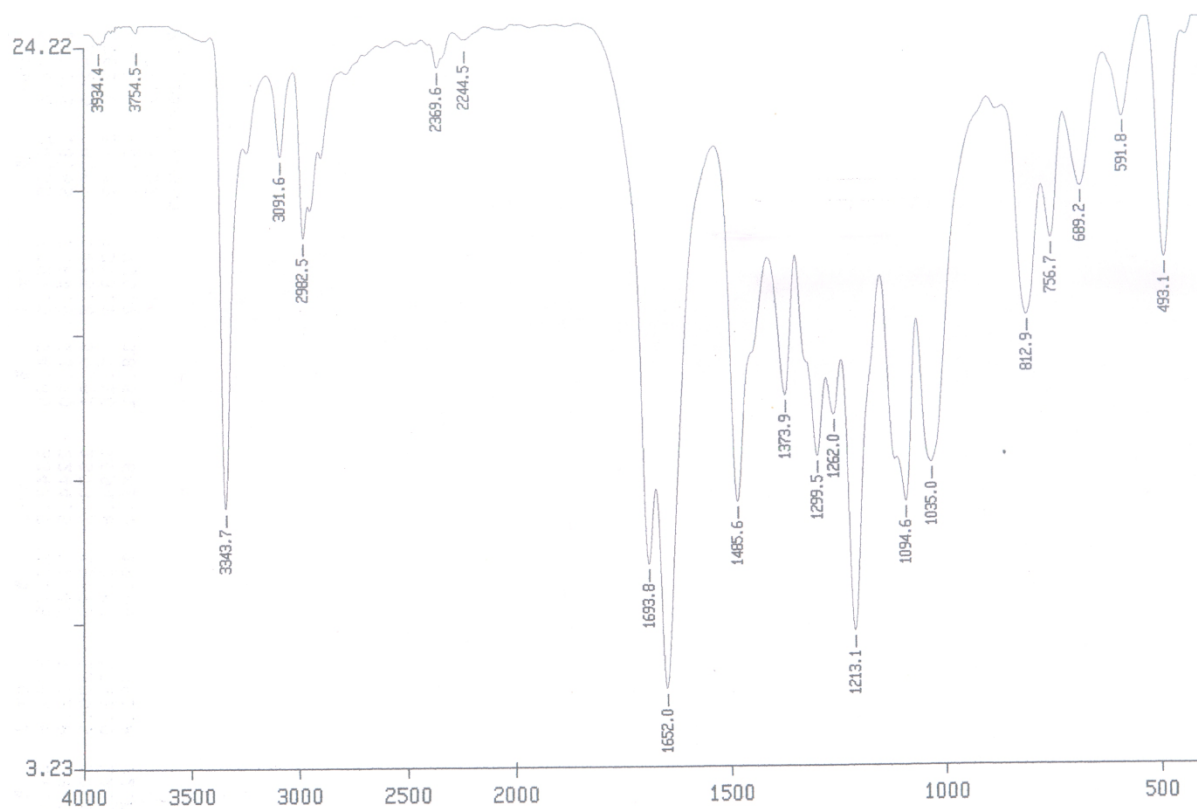

FT-IR of compound 5d

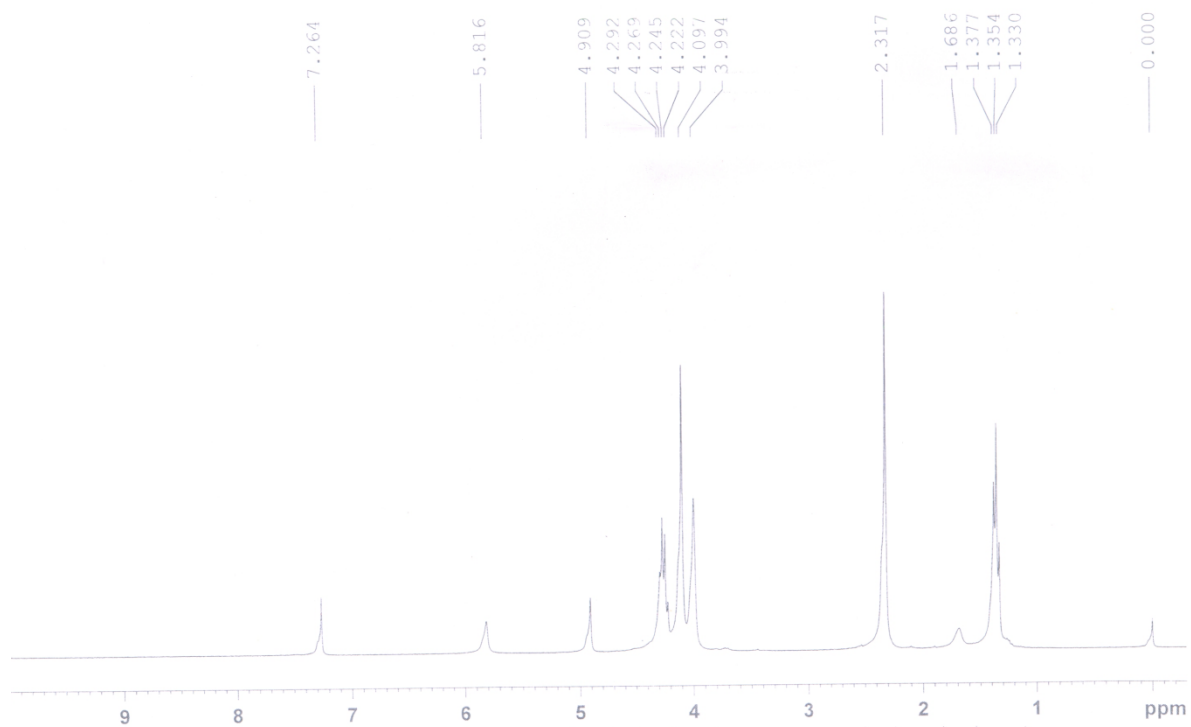 $^1\text{H}$  NMR of compound 5d

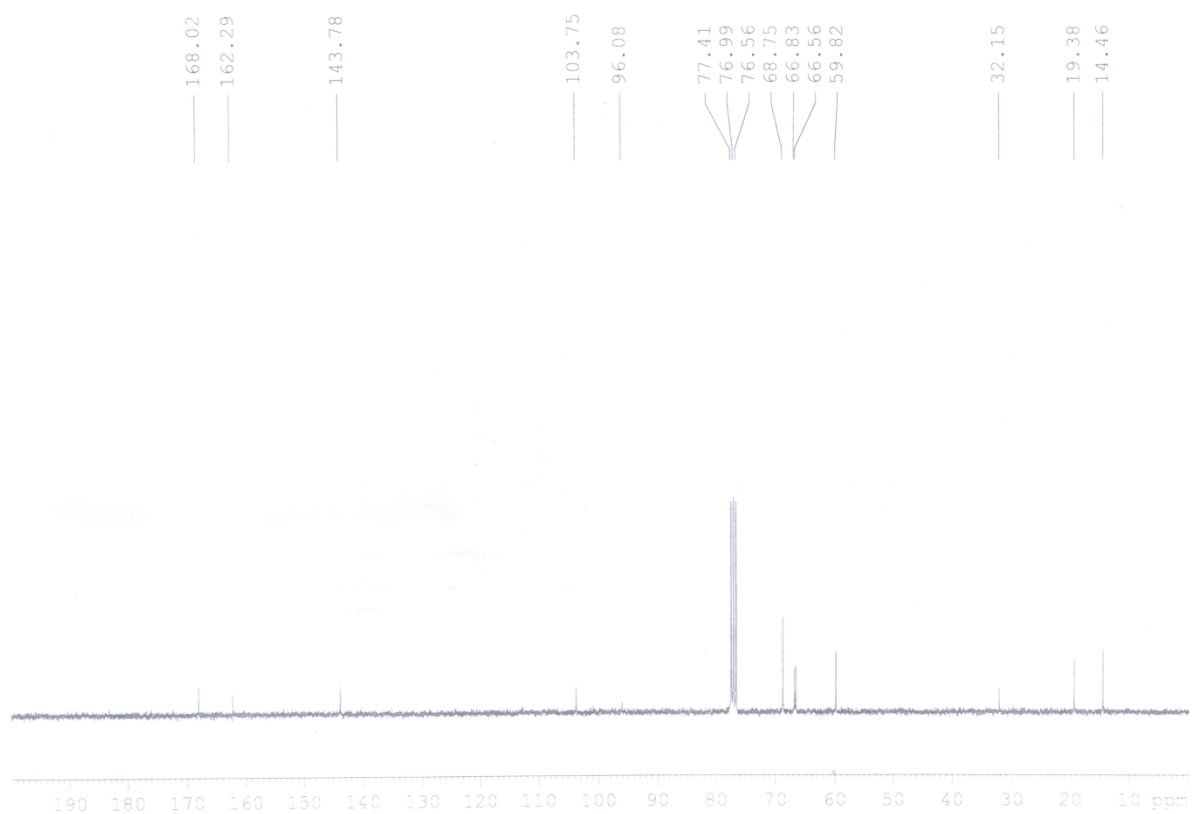

$^{13}\text{C}$  NMR of compound 5d

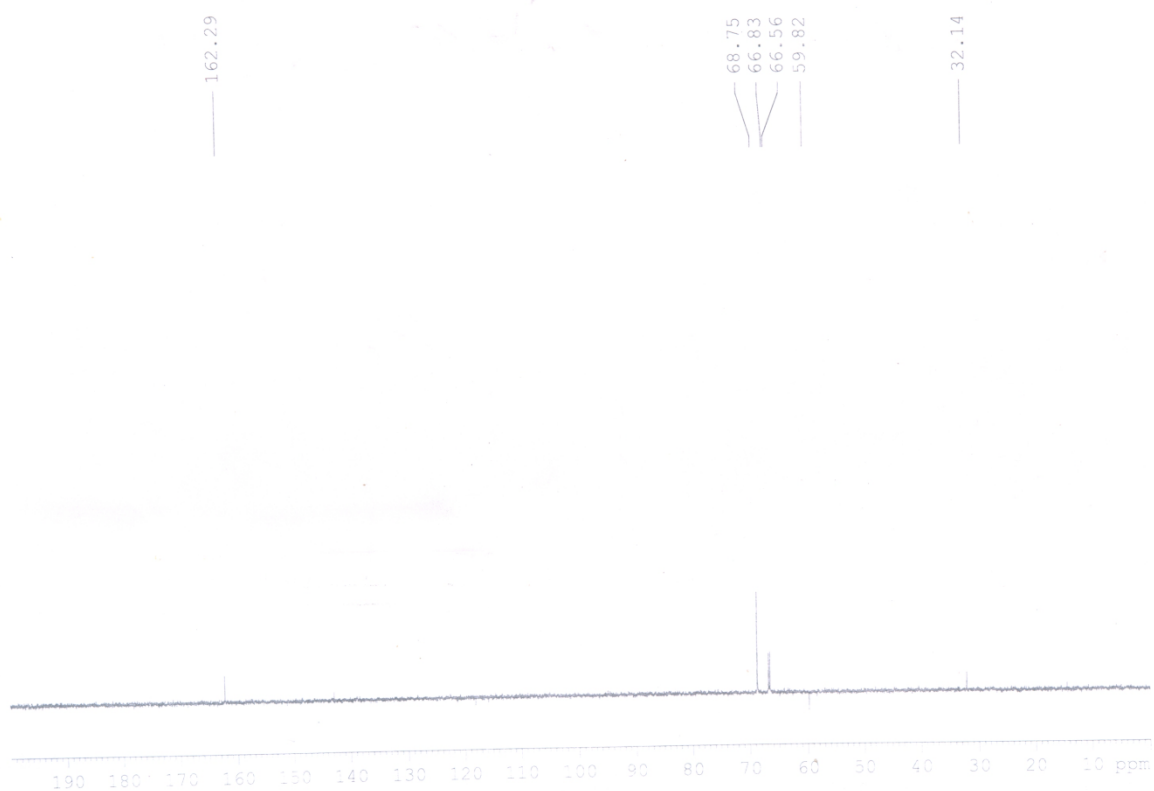

## DEPT NMR of compound 5d

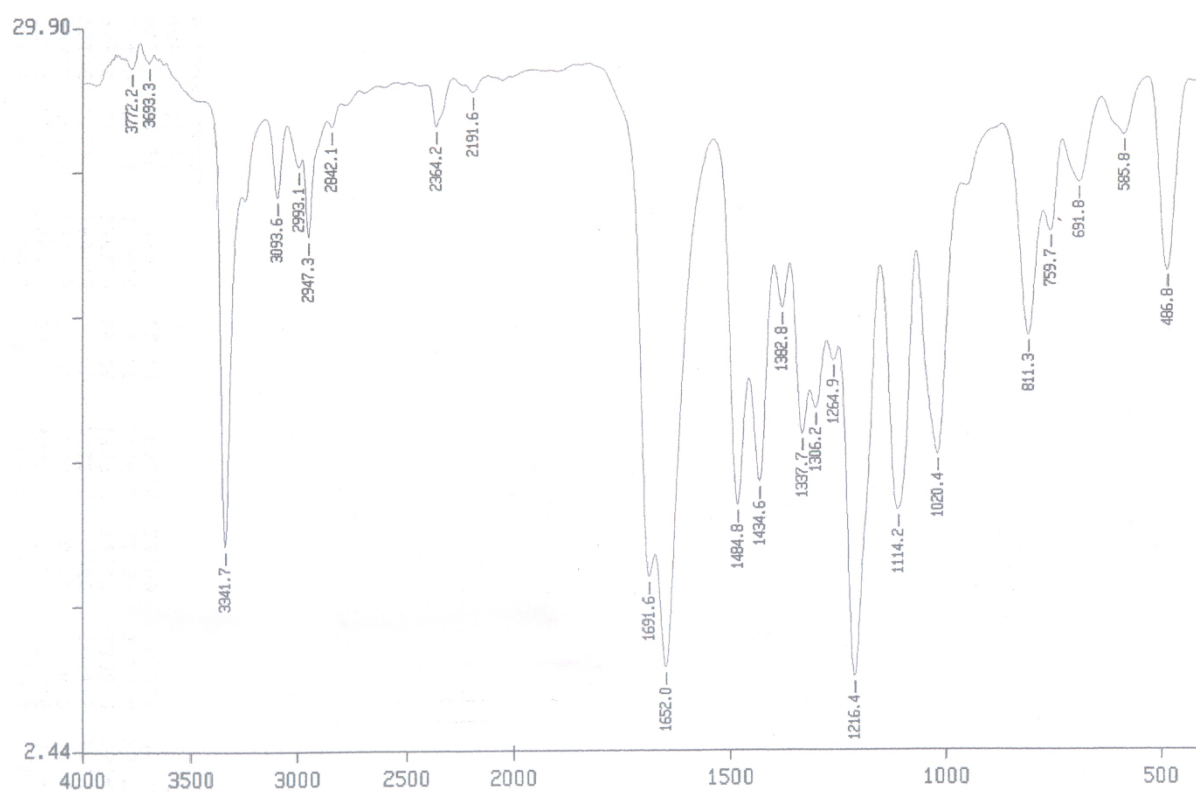

## FT-IR NMR of compound 5e

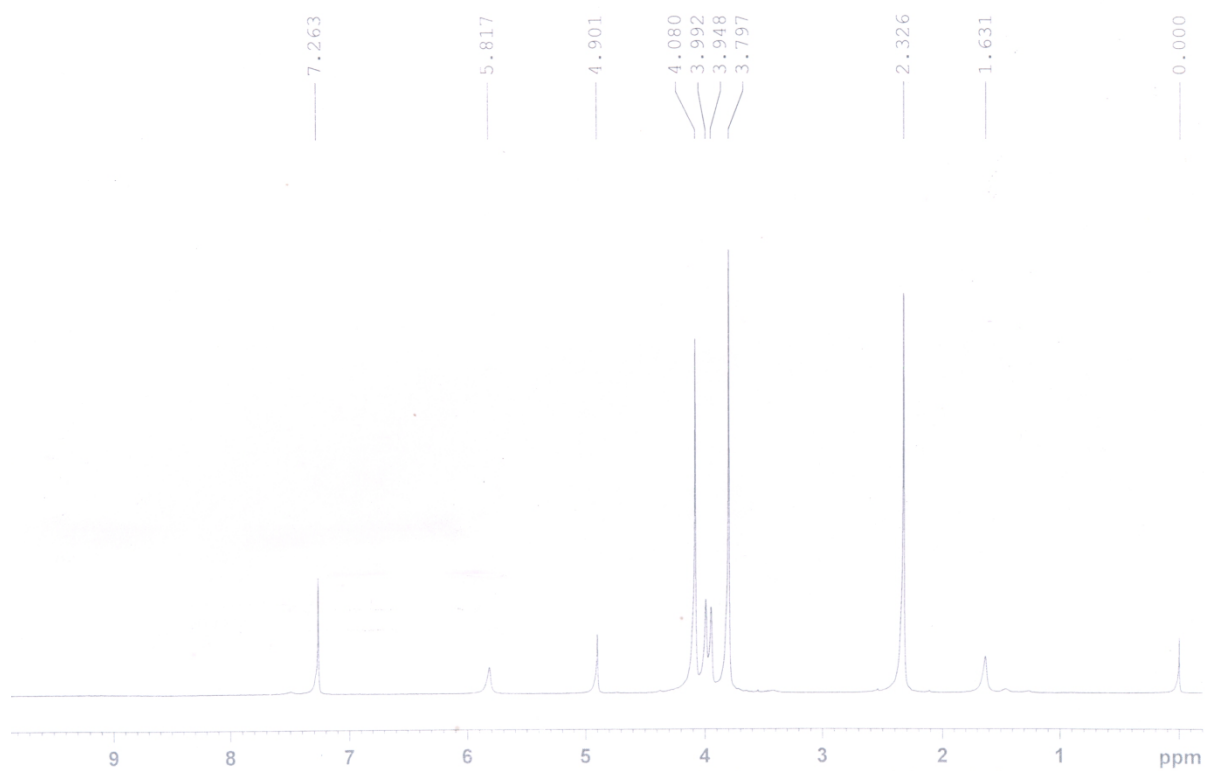

$^1\text{H}$  NMR of compound 5e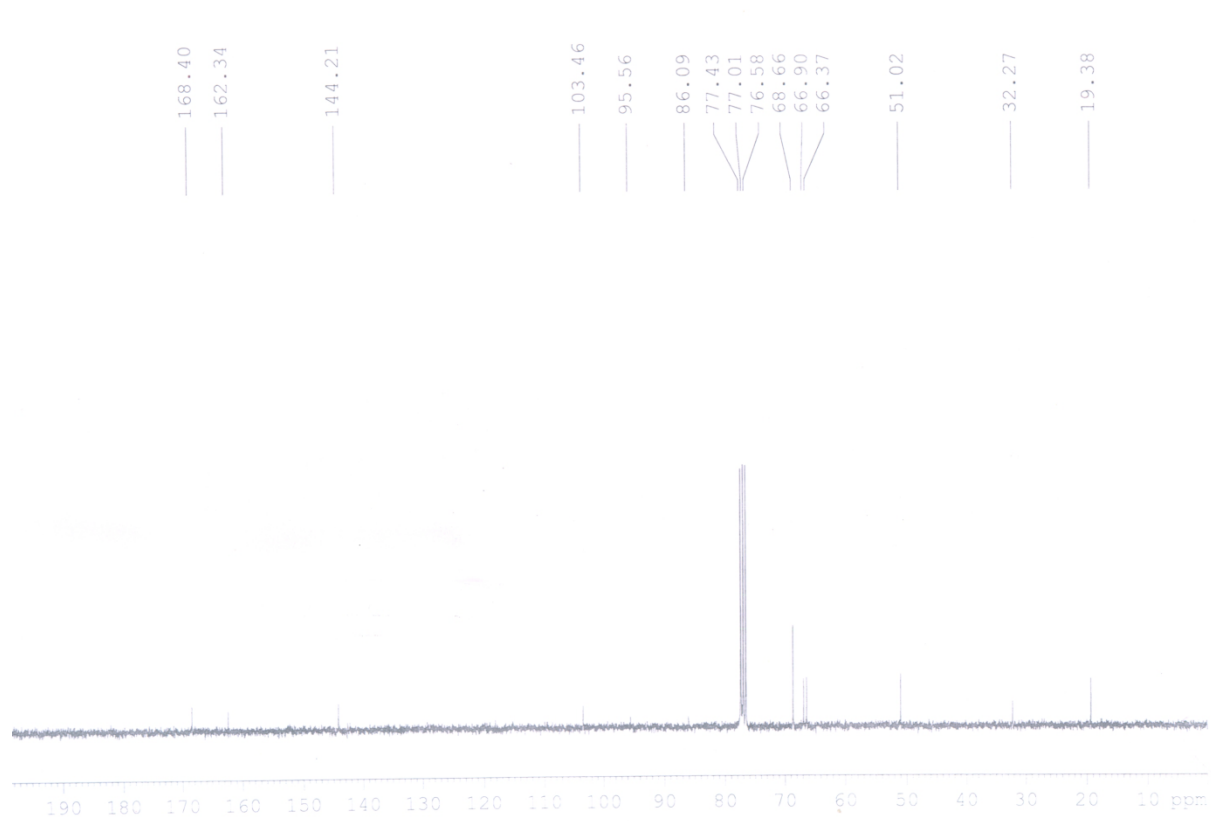 $^{13}\text{C}$  NMR of compound of 5e

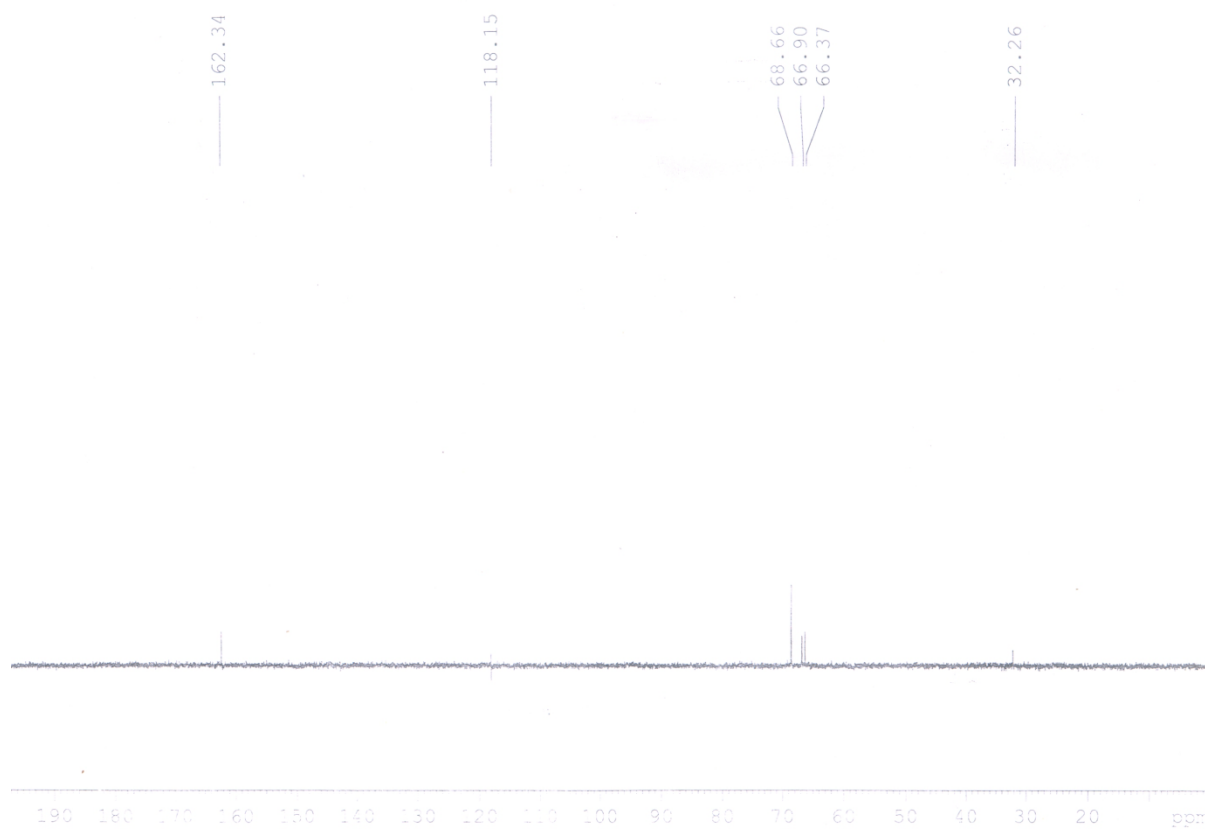

DEPT NMR of compound 5e

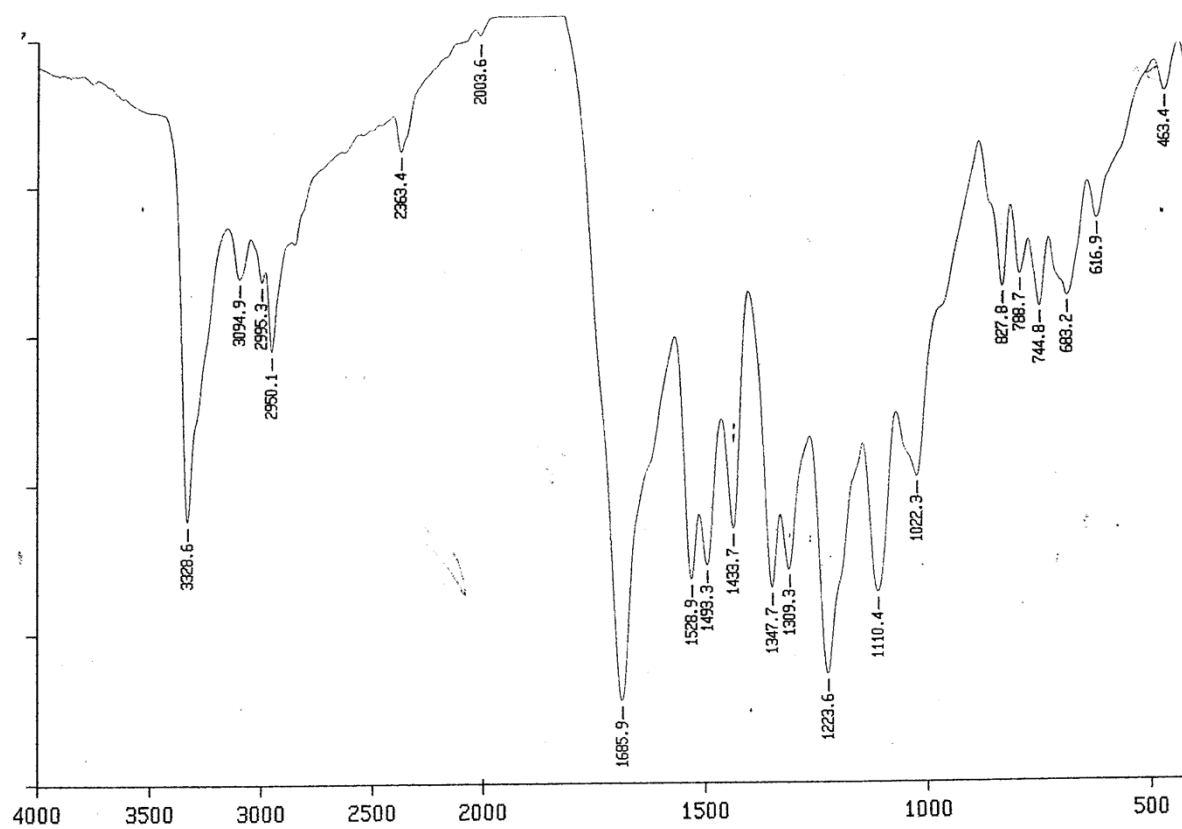

FT-IR of compound 5f

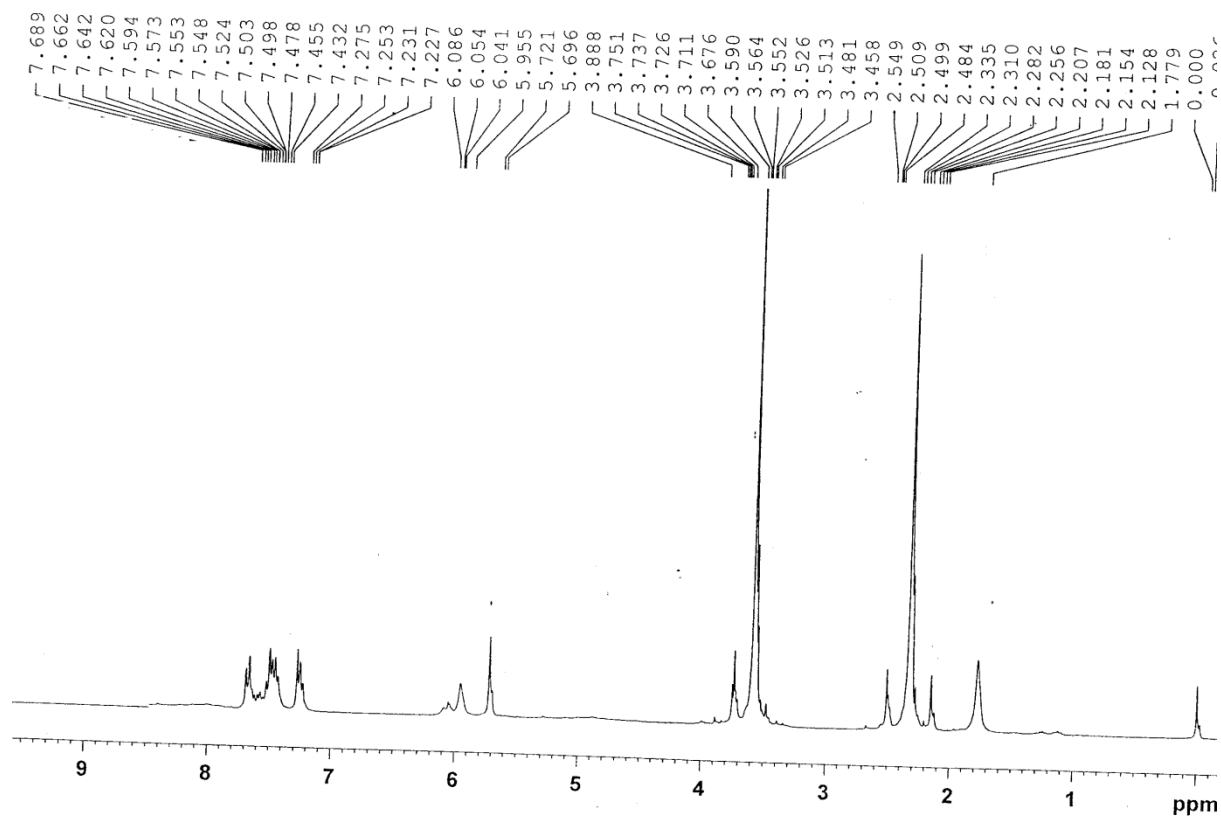

<sup>1</sup>H NMR of compound 5f

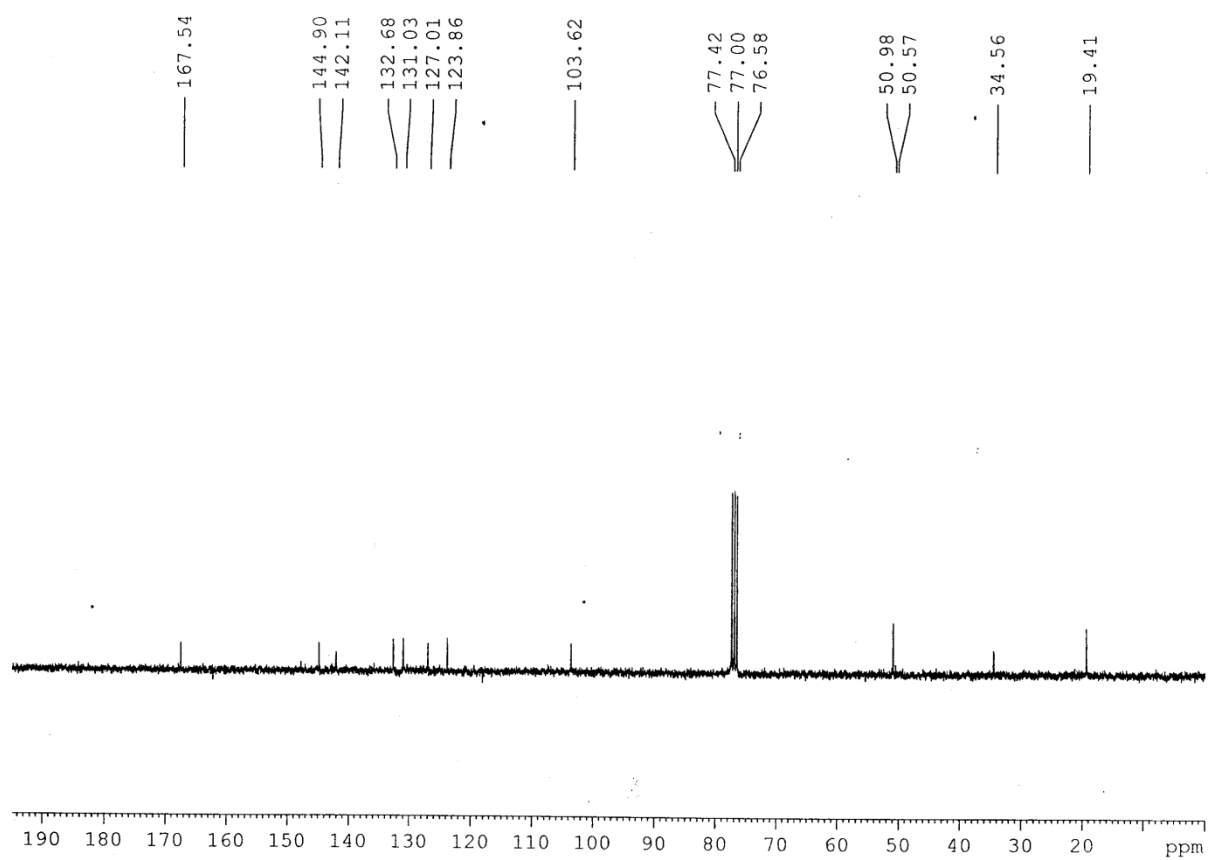

<sup>13</sup>C NMR of compound 5f



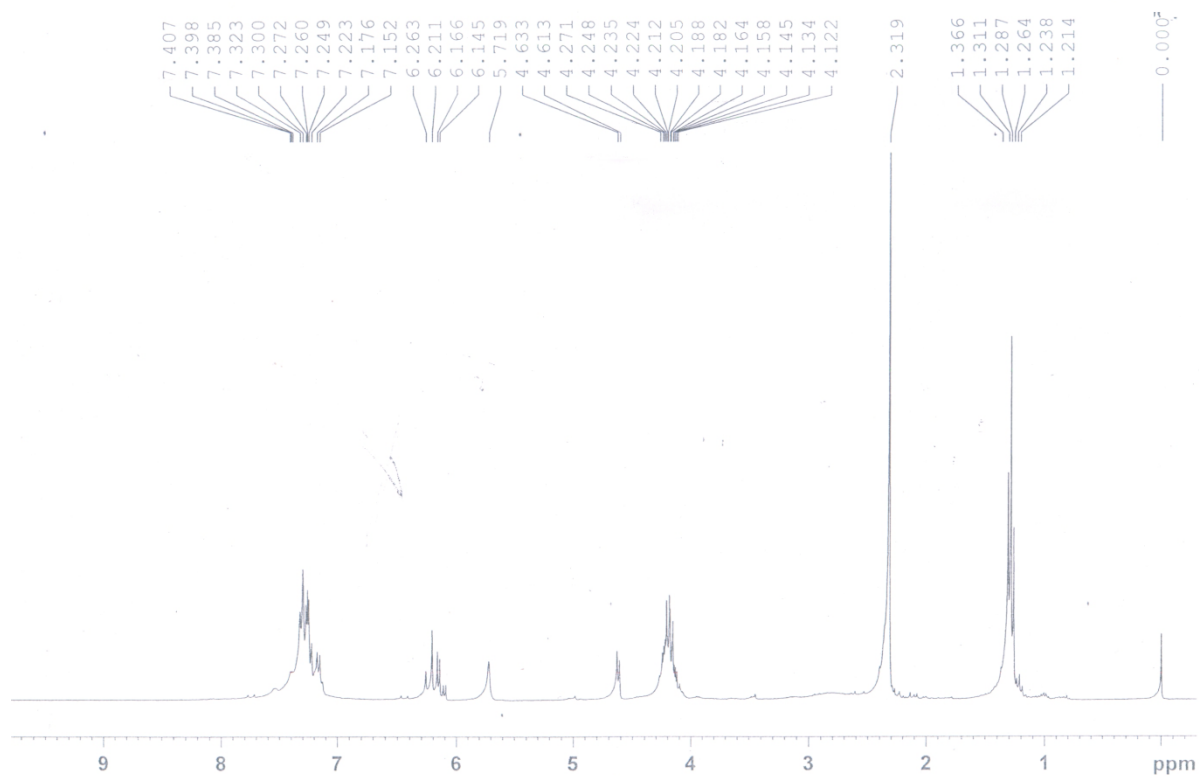

<sup>1</sup>H NMR of compound 5g

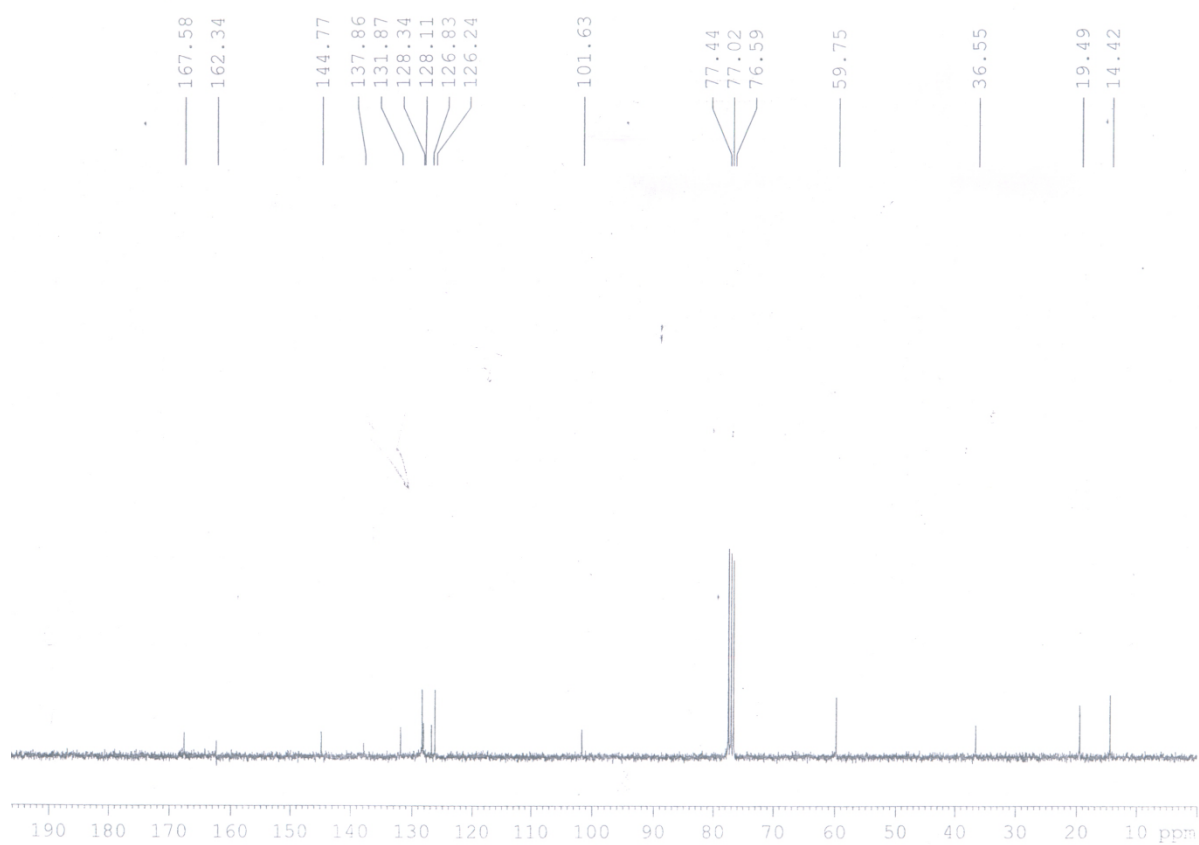

$^{13}\text{C}$  NMR of compound 5g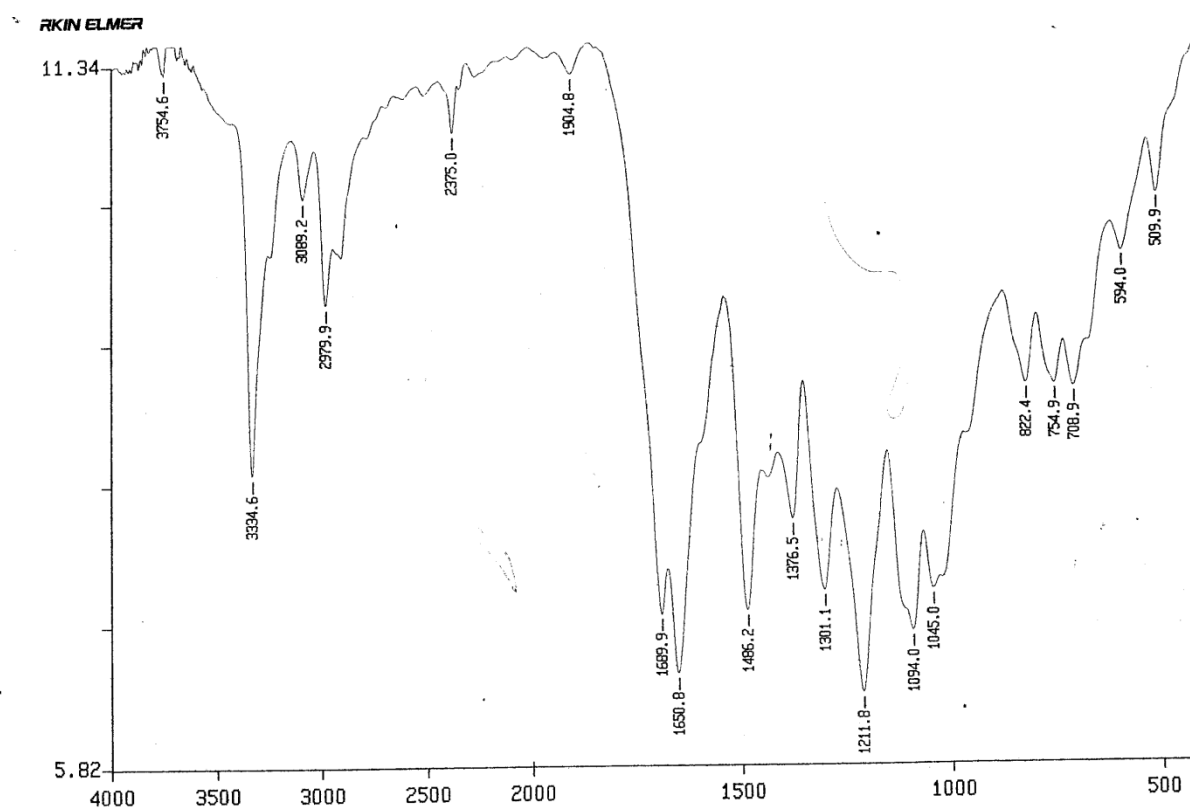

## FT-IR of compound 5h

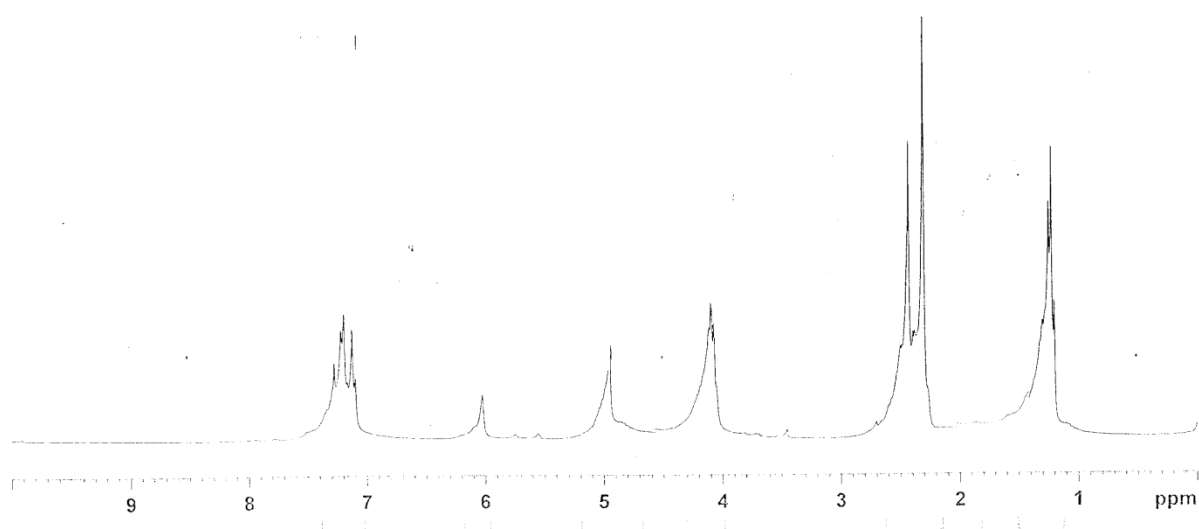

$^1\text{H}$  NMR of compound 5h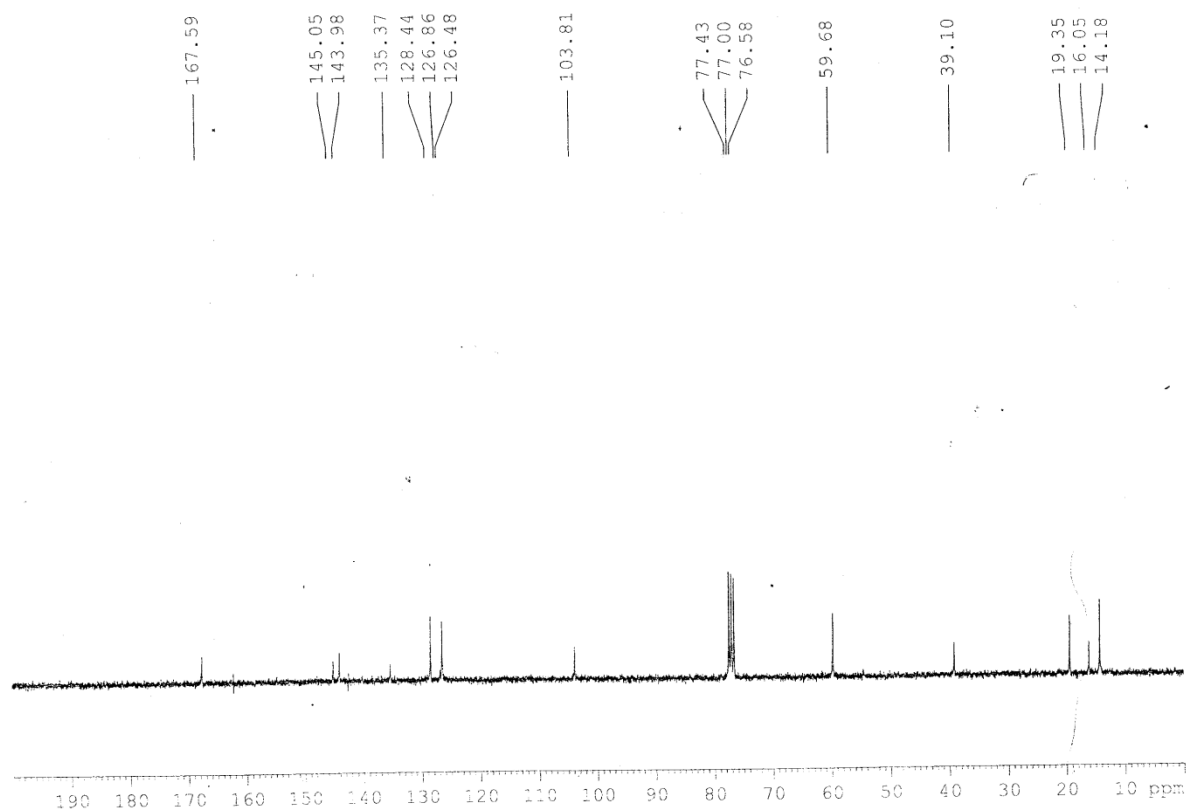 $^{13}\text{C}$  NMR of compound 5h

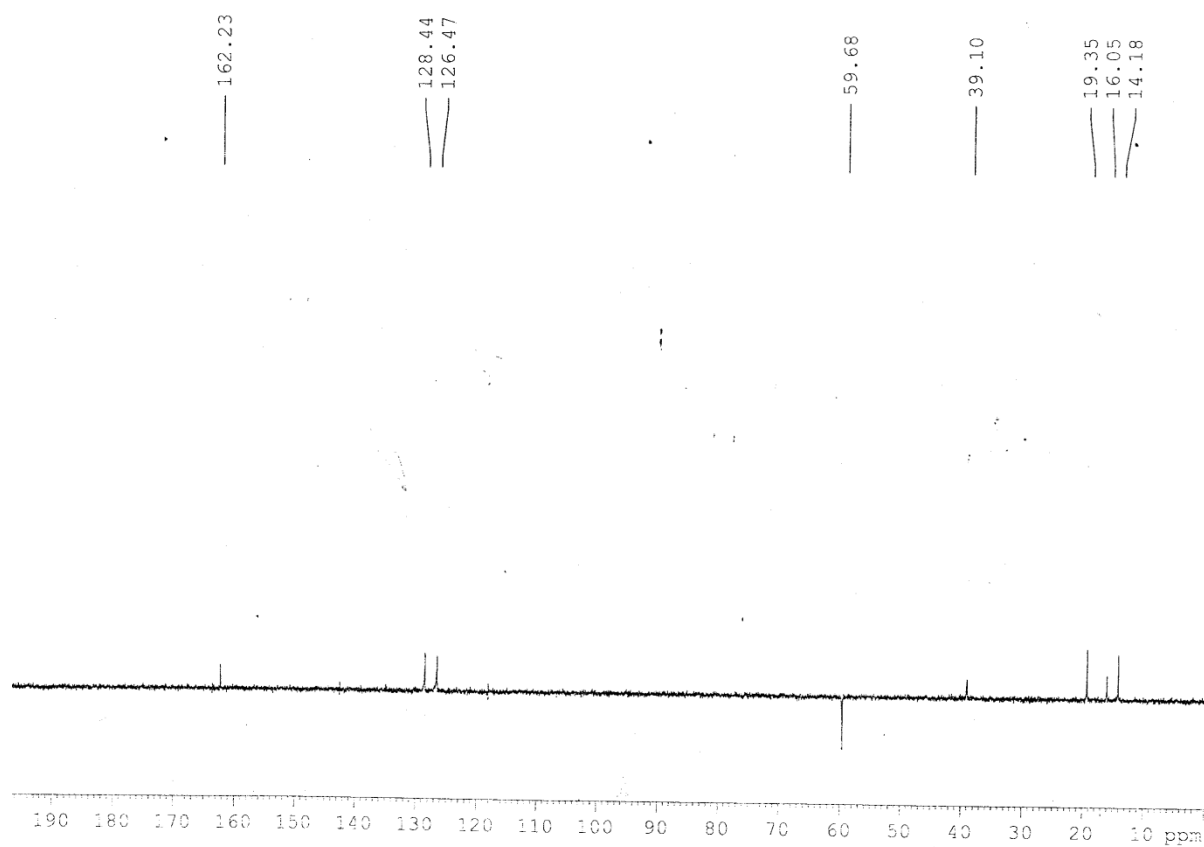

DEPT NMR of compound 5h

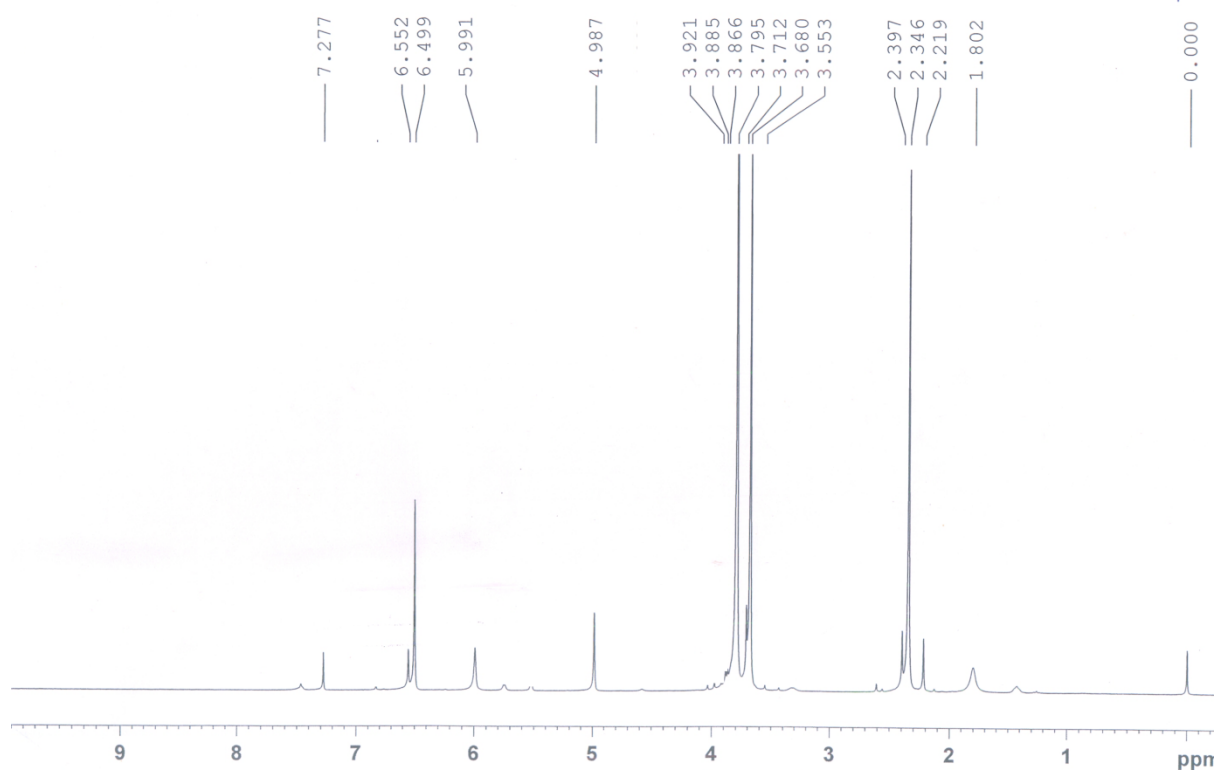

<sup>1</sup>H NMR of compound 5i

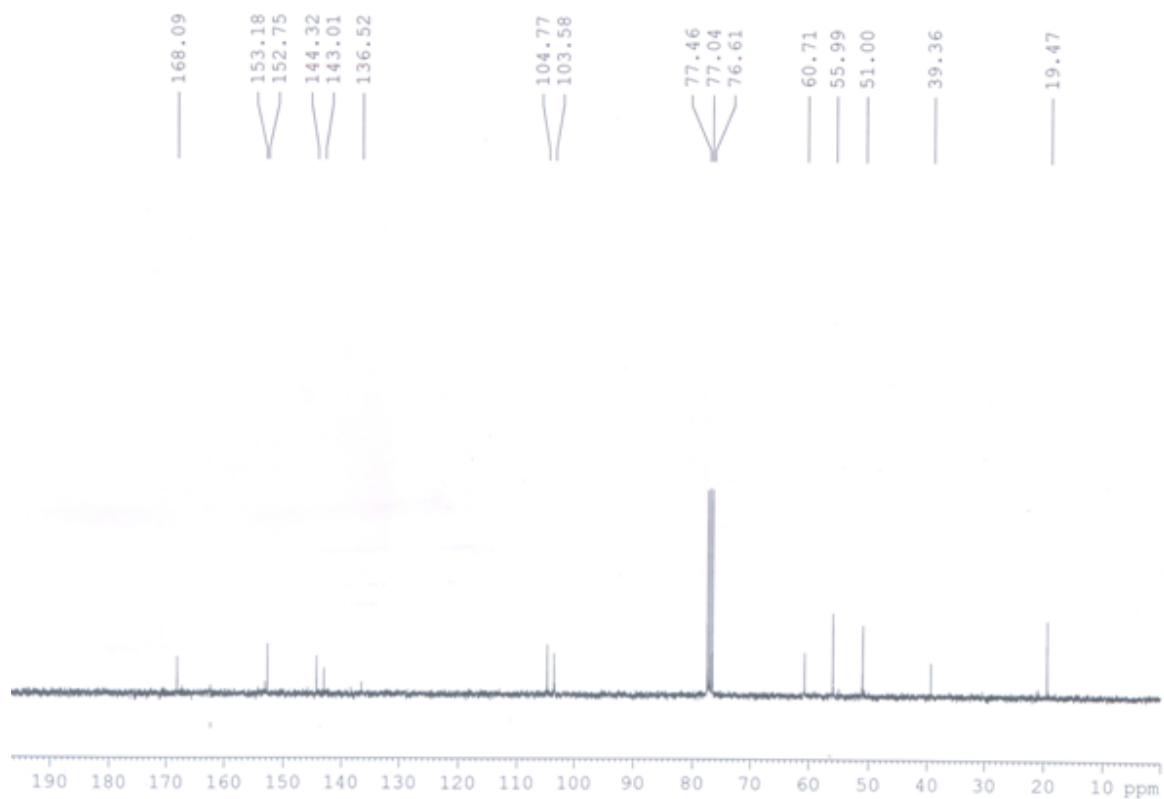

<sup>13</sup>C NMR of compound 5i

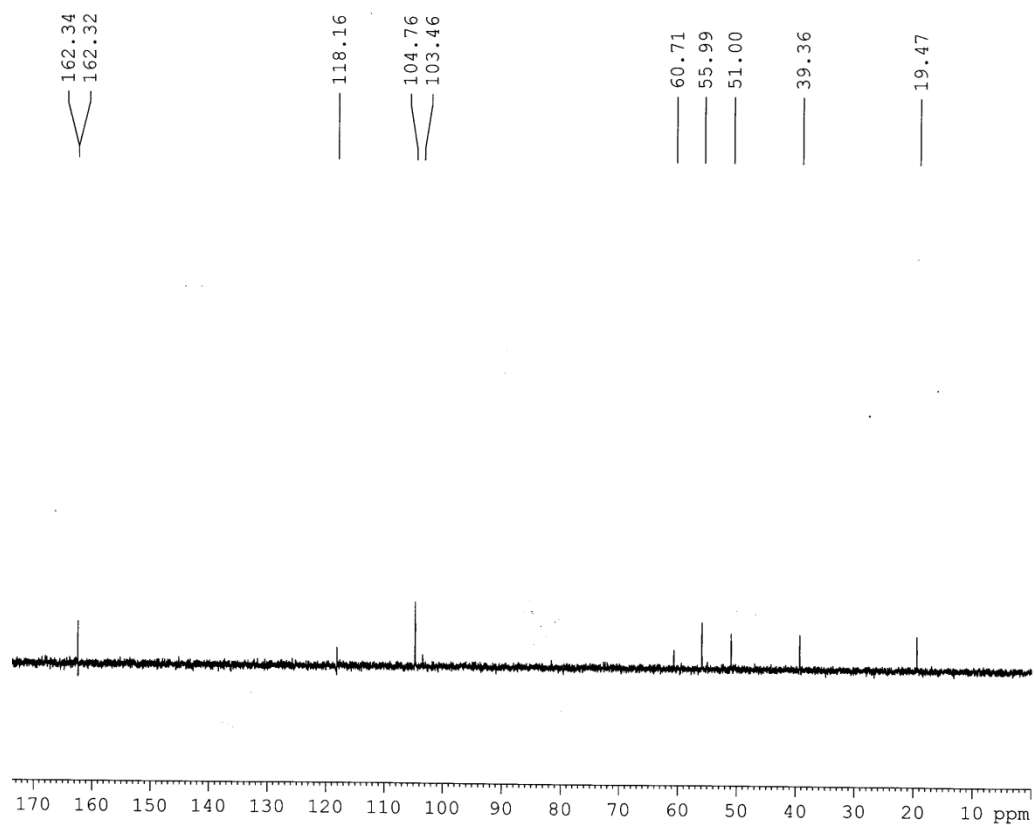

DEPT NMR of compound 5i

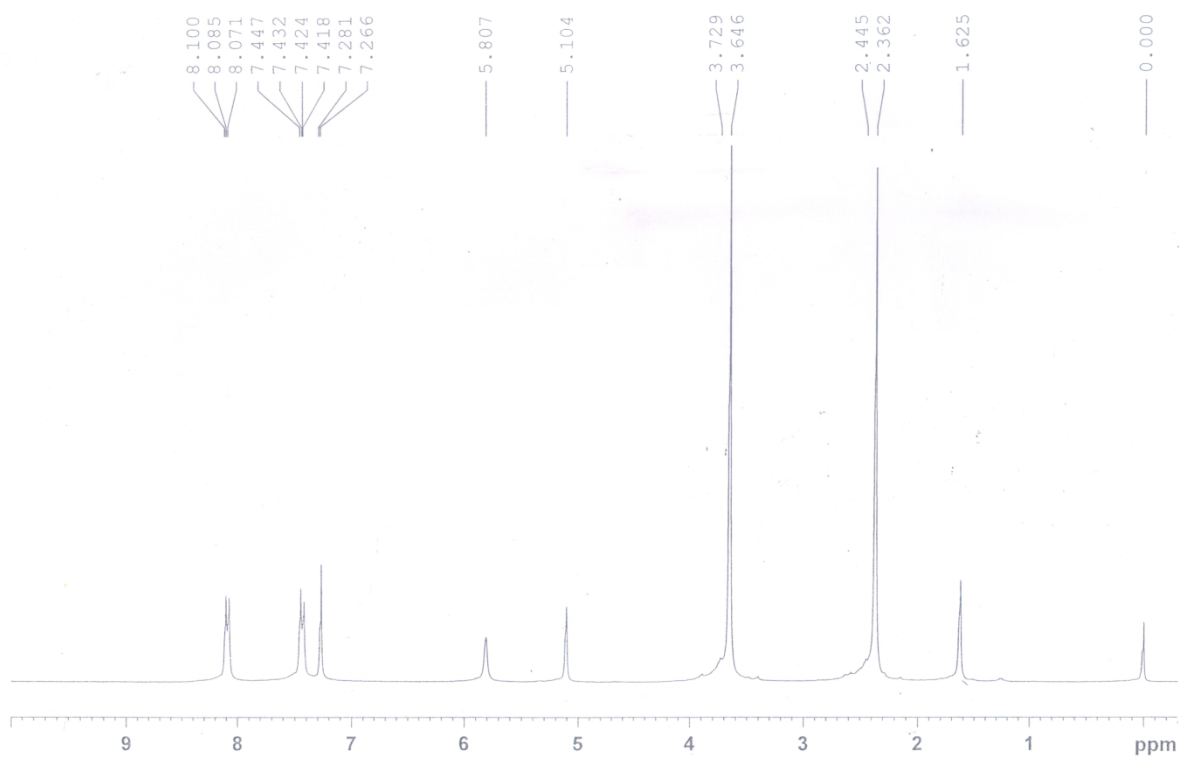

<sup>1</sup>H NMR of compound 5j

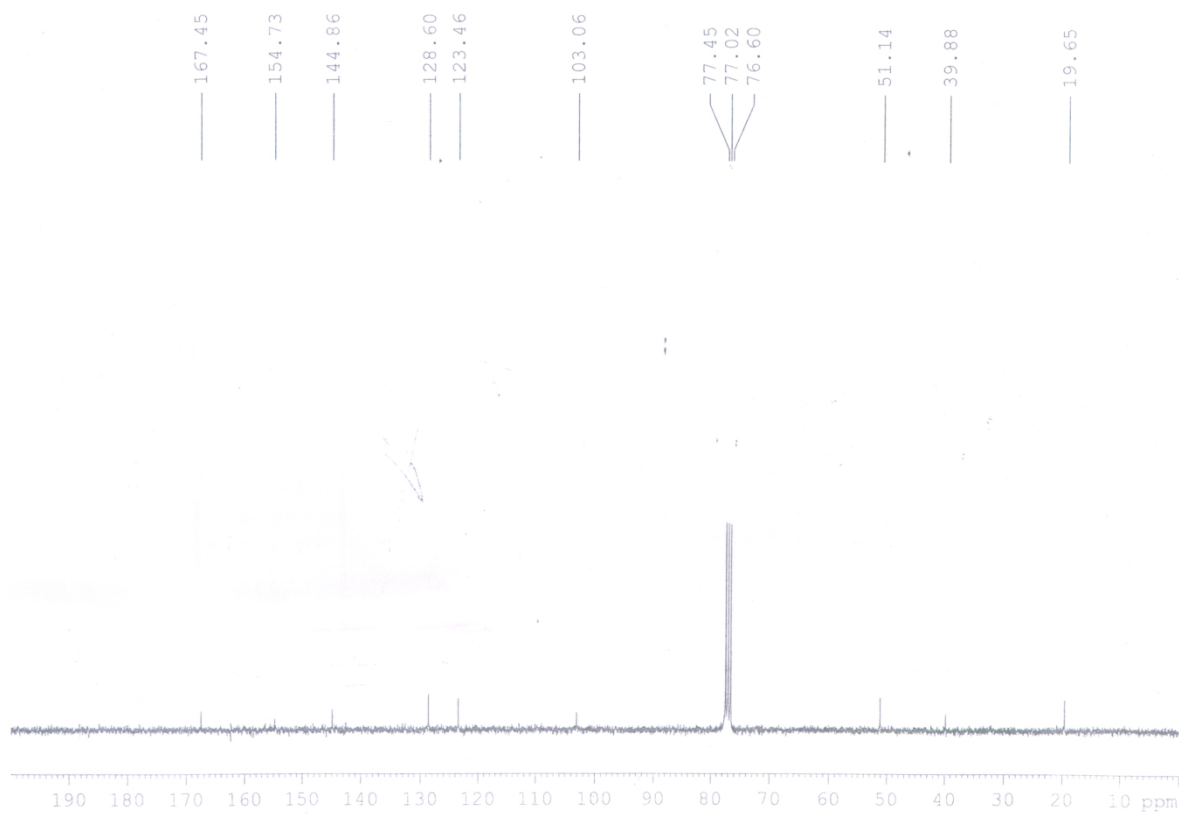

<sup>13</sup>C NMR of compound 5j

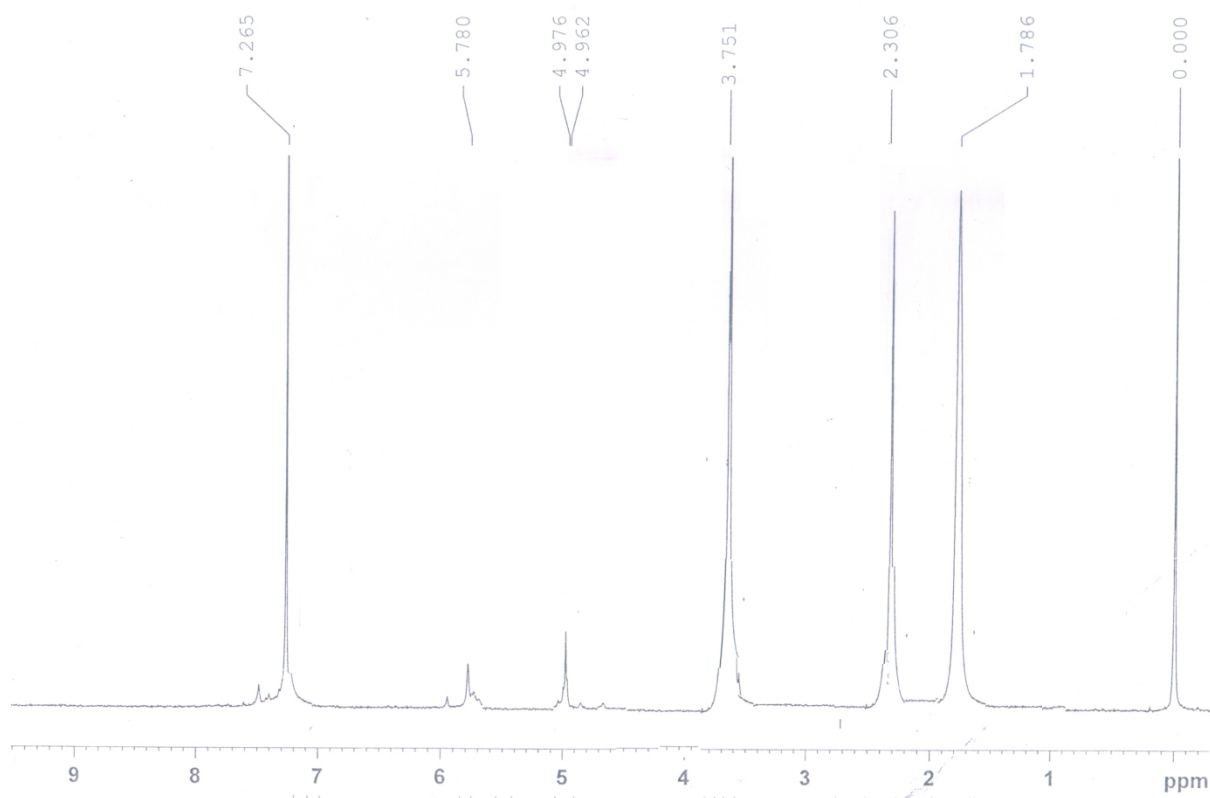

$^1\text{H}$  NMR of compound 5k

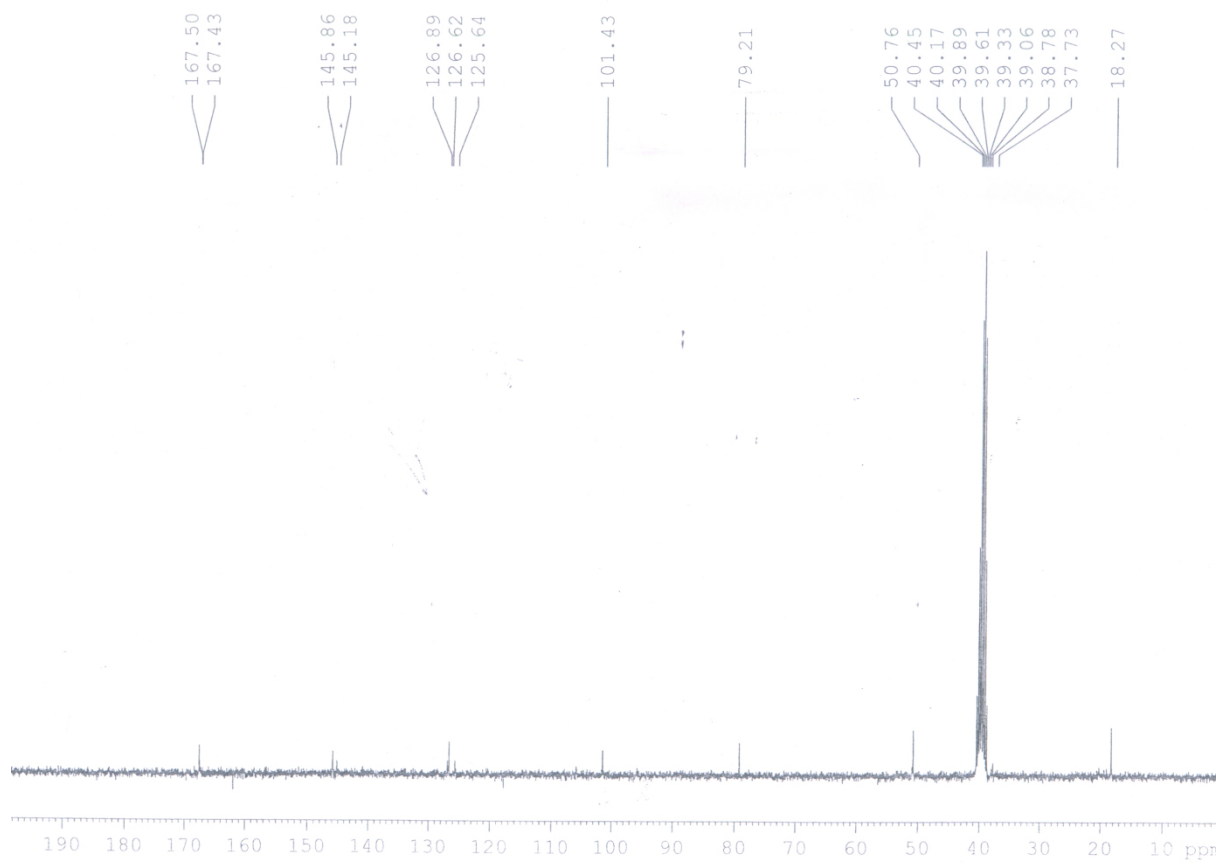



$^{13}\text{C}$  NMR of compound 5k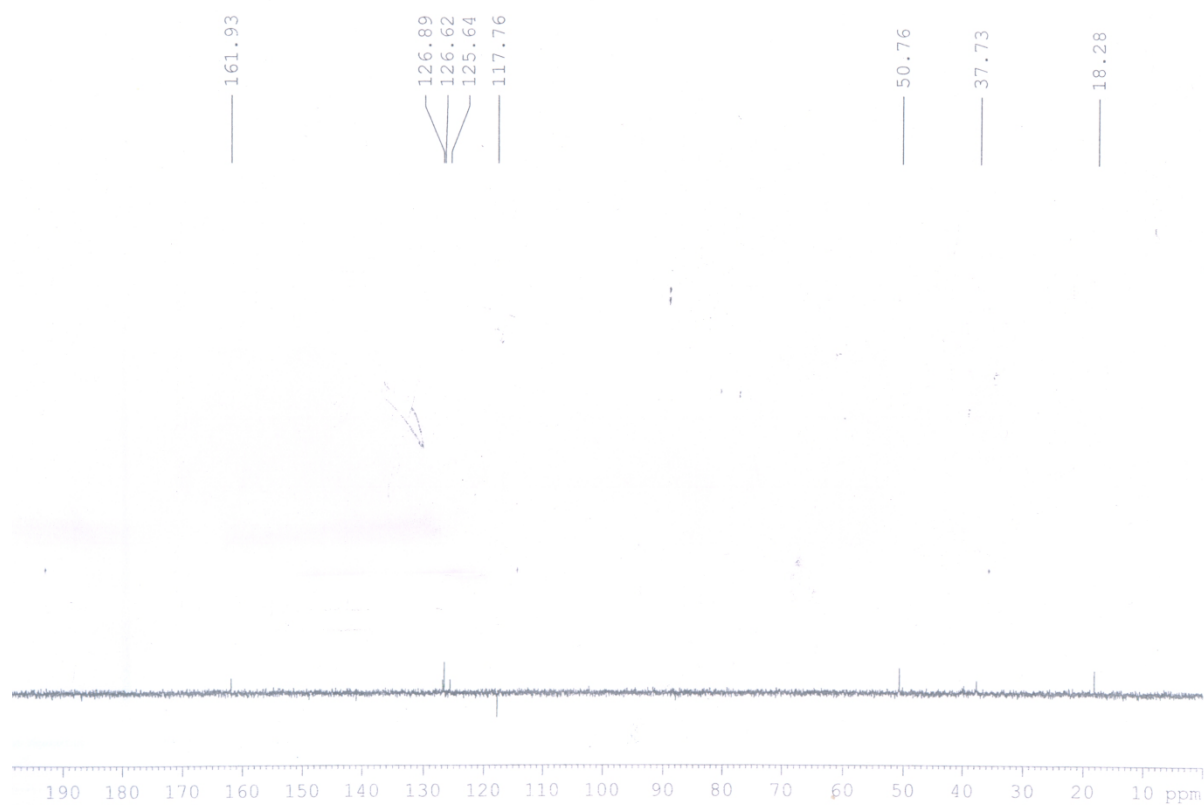

## DEPT NMR of compound 5k

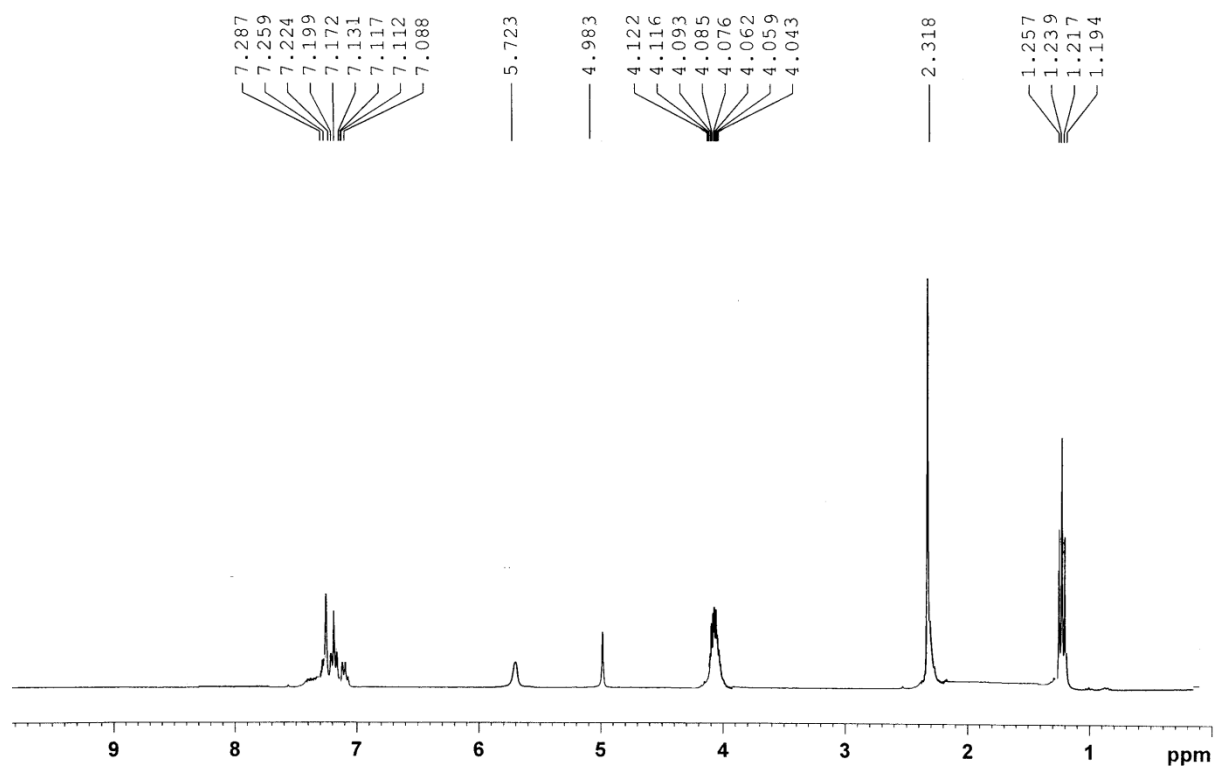

$^1\text{H}$  NMR of compound 51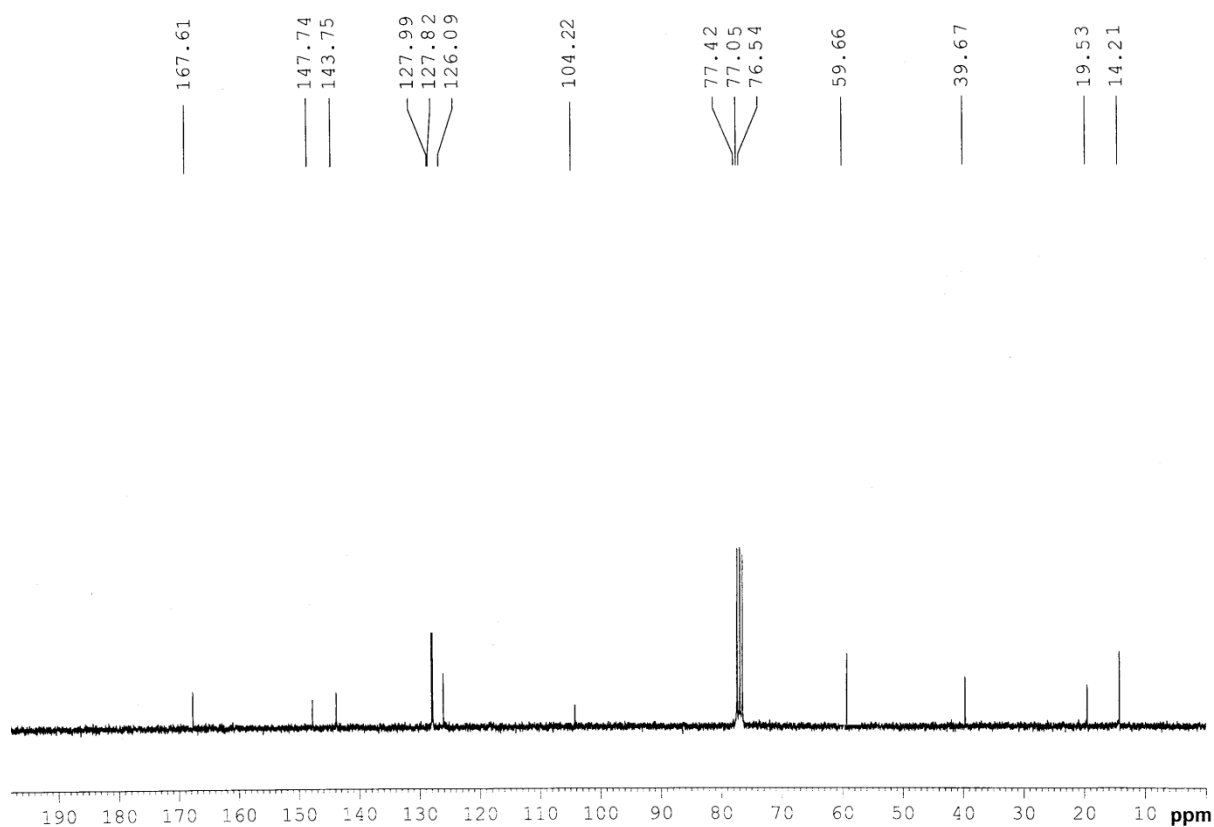 $^{13}\text{C}$  NMR of compound 51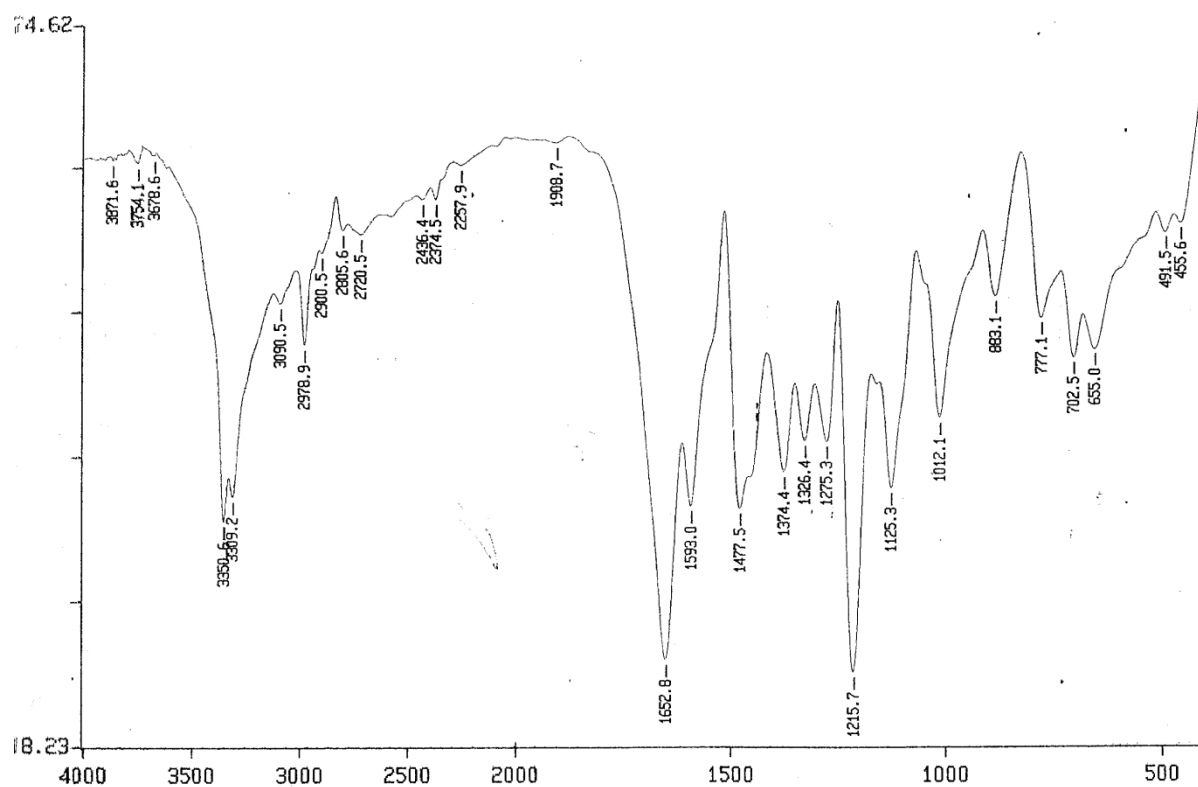

## FT-IR of compound 5m

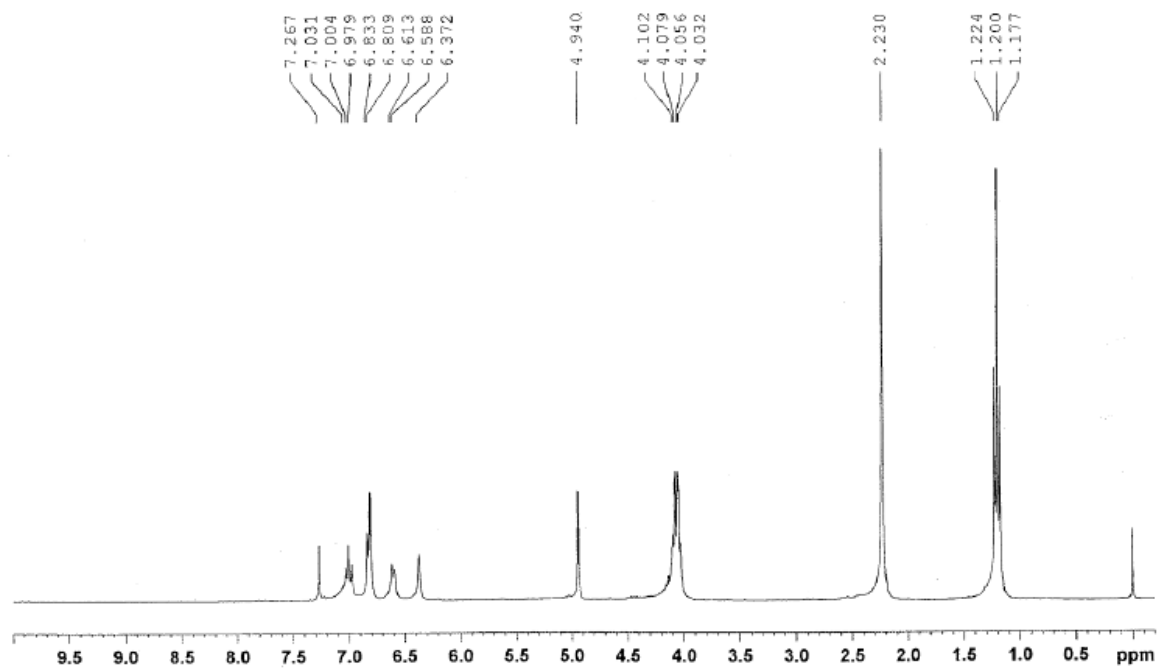<sup>1</sup>H NMR of compound 5m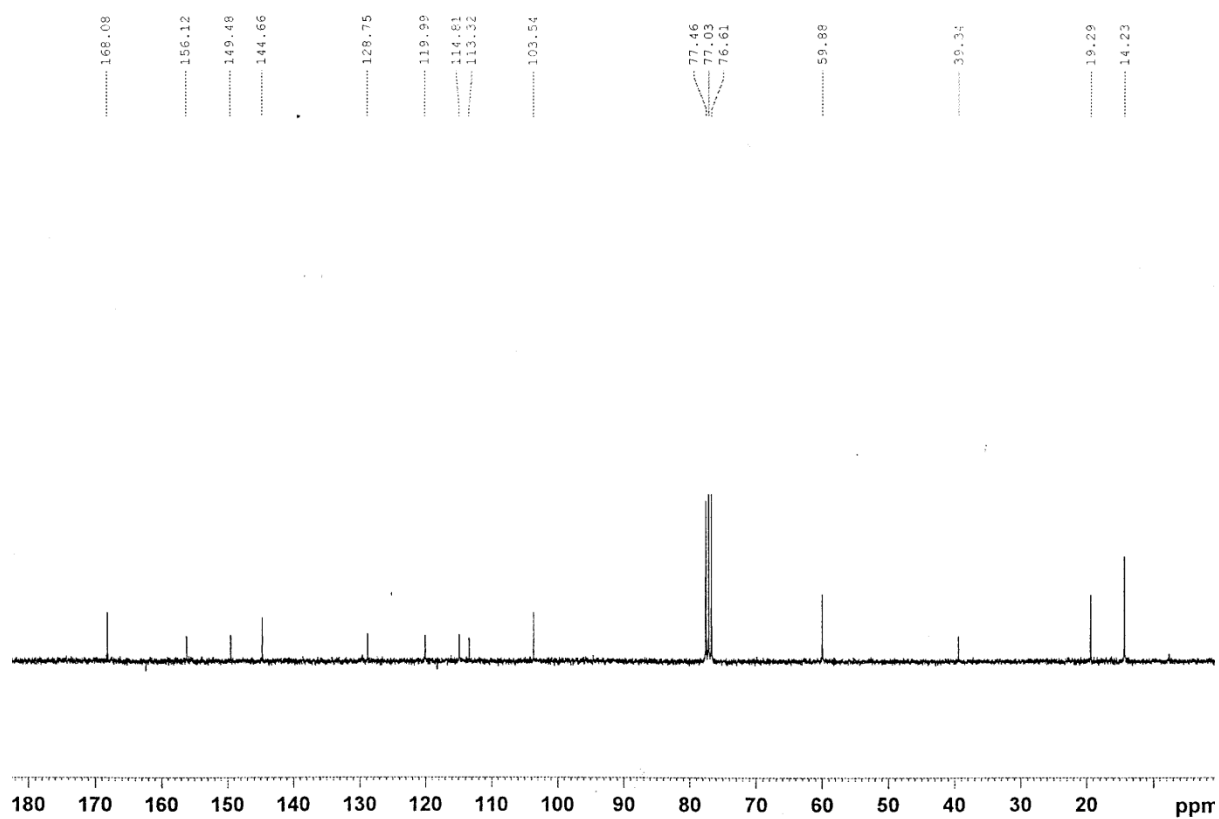

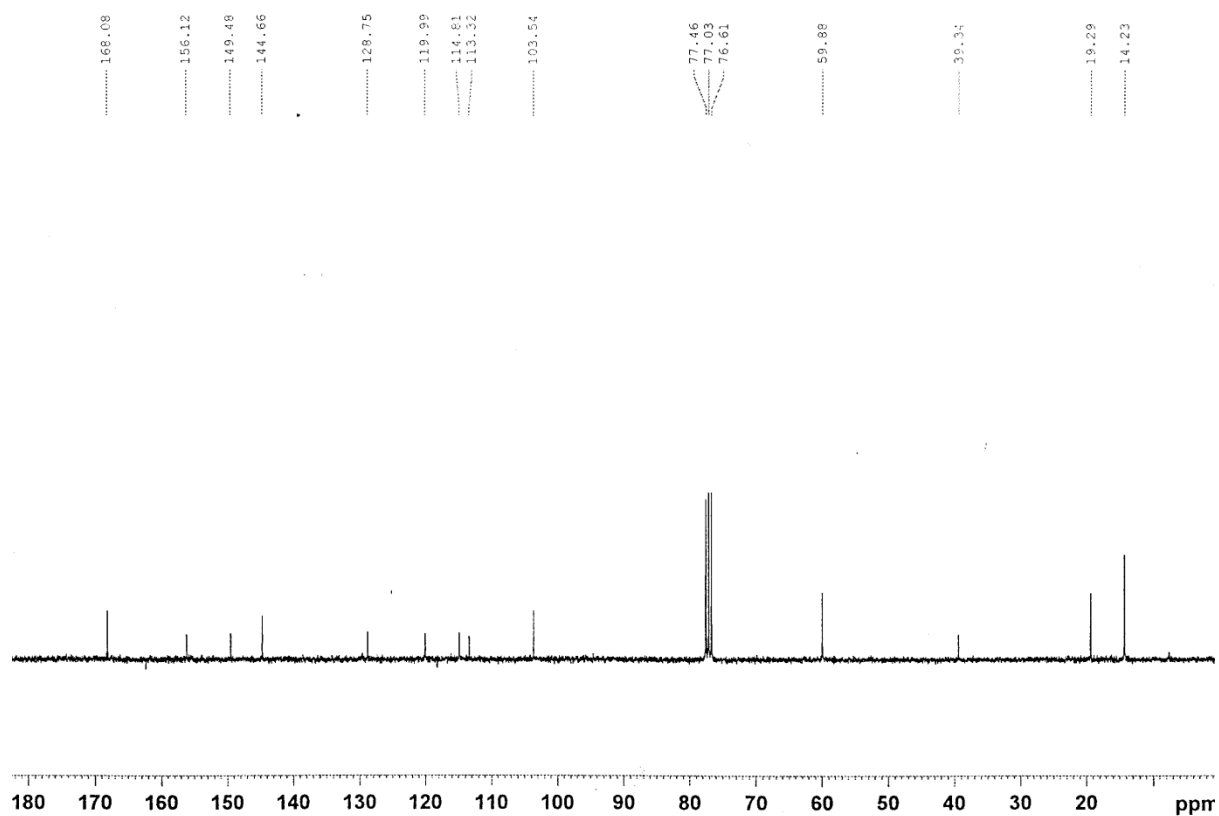

$^{13}\text{C}$  NMR of compound 5m

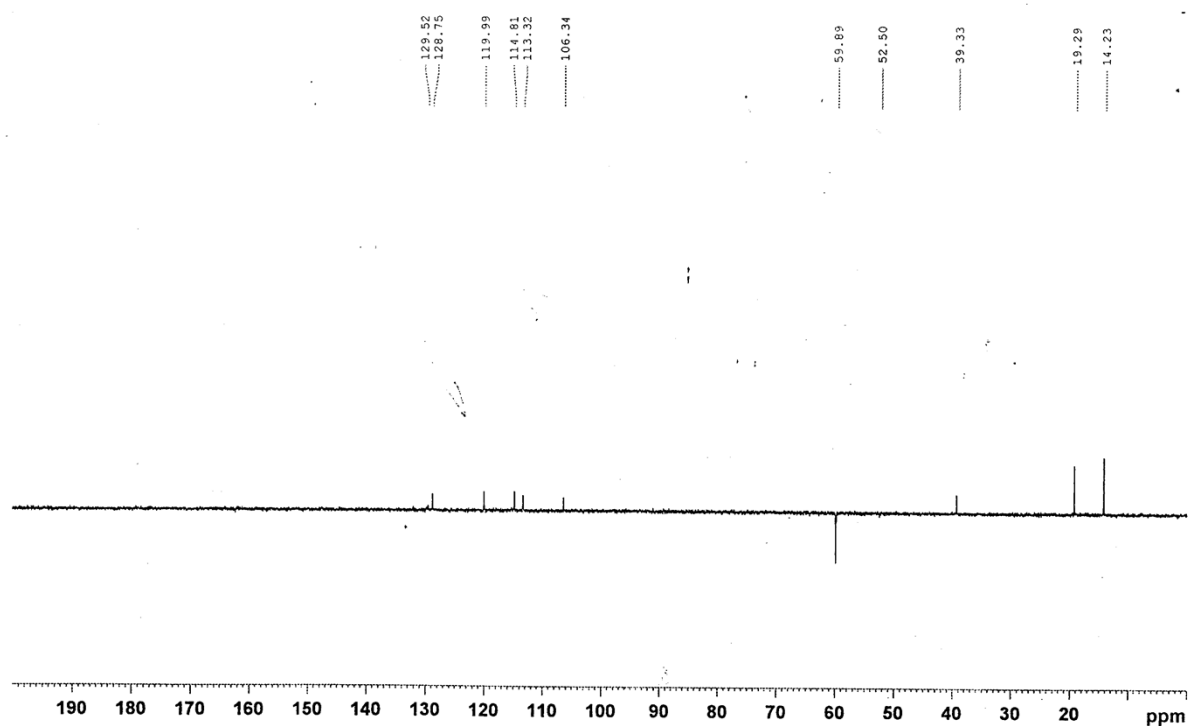

DEPT NMR of compound 5m

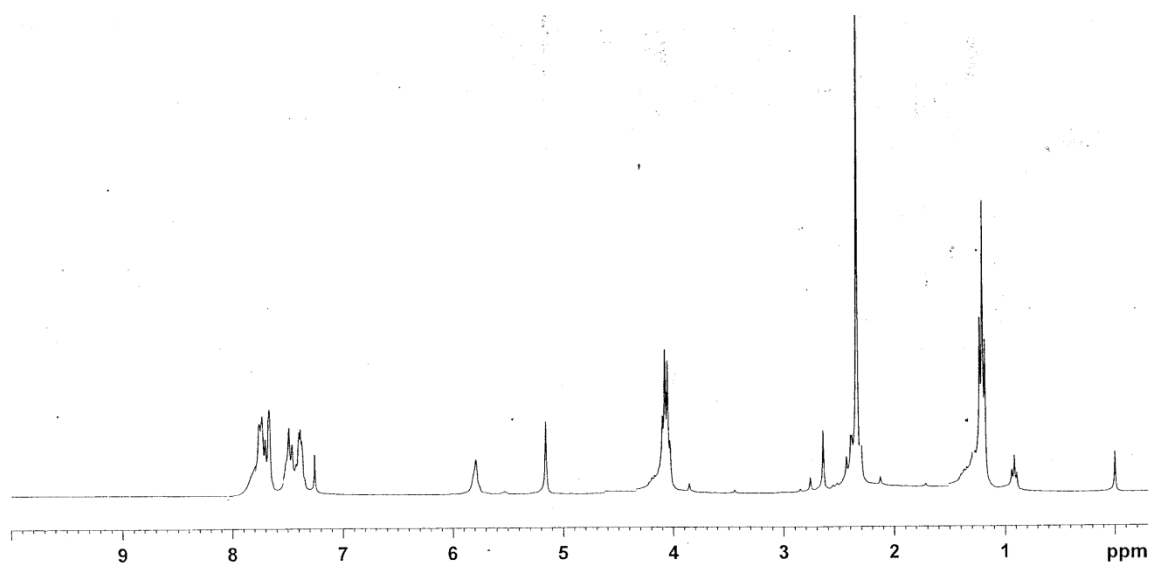

$^1\text{H}$  NMR of compound 5n

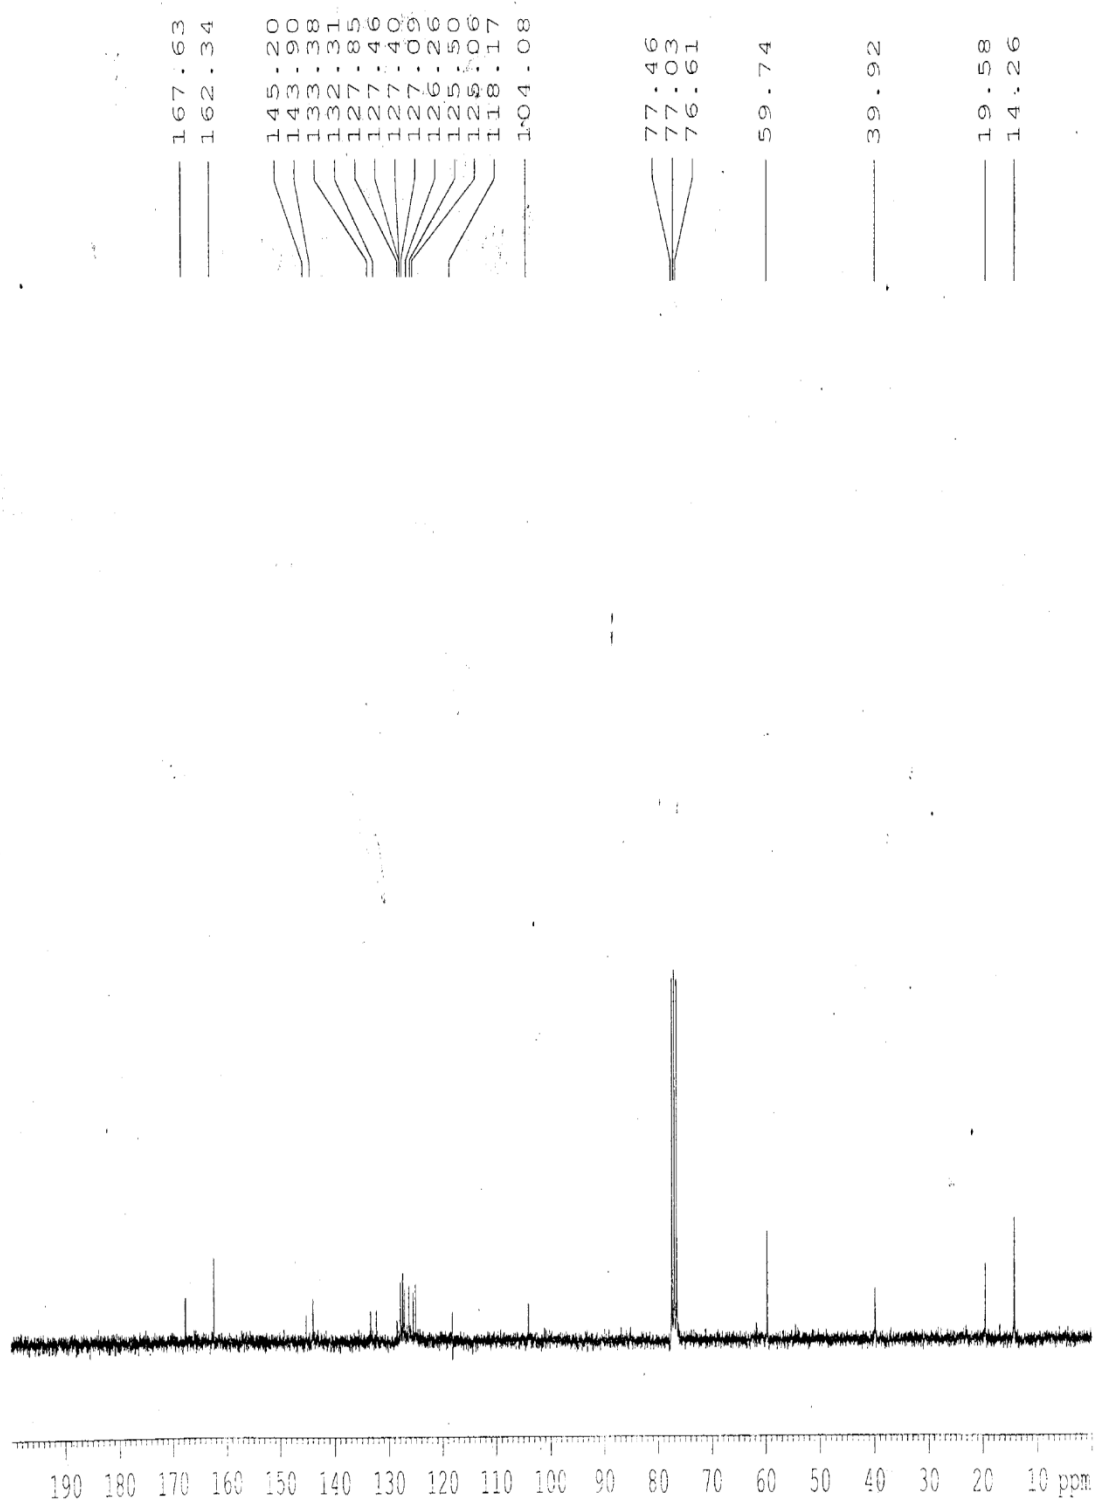

$^{13}\text{C}$  NMR of compound 5n

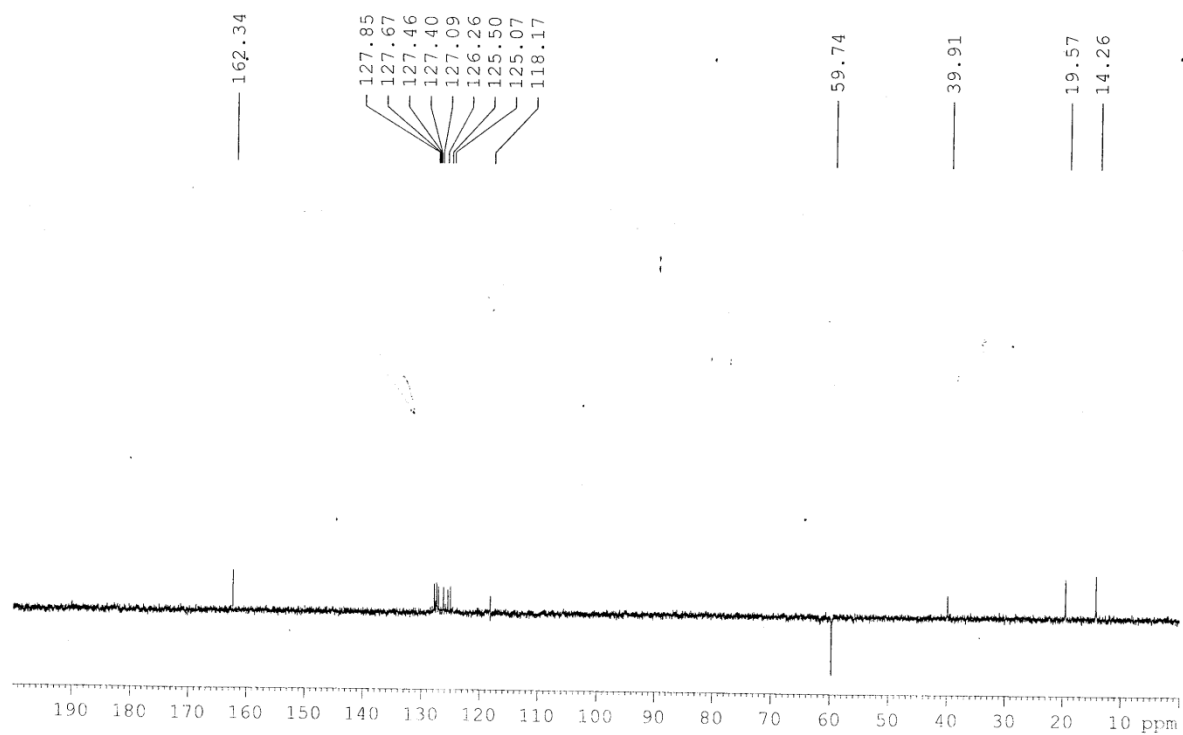

DEPT NMR of compound 5n

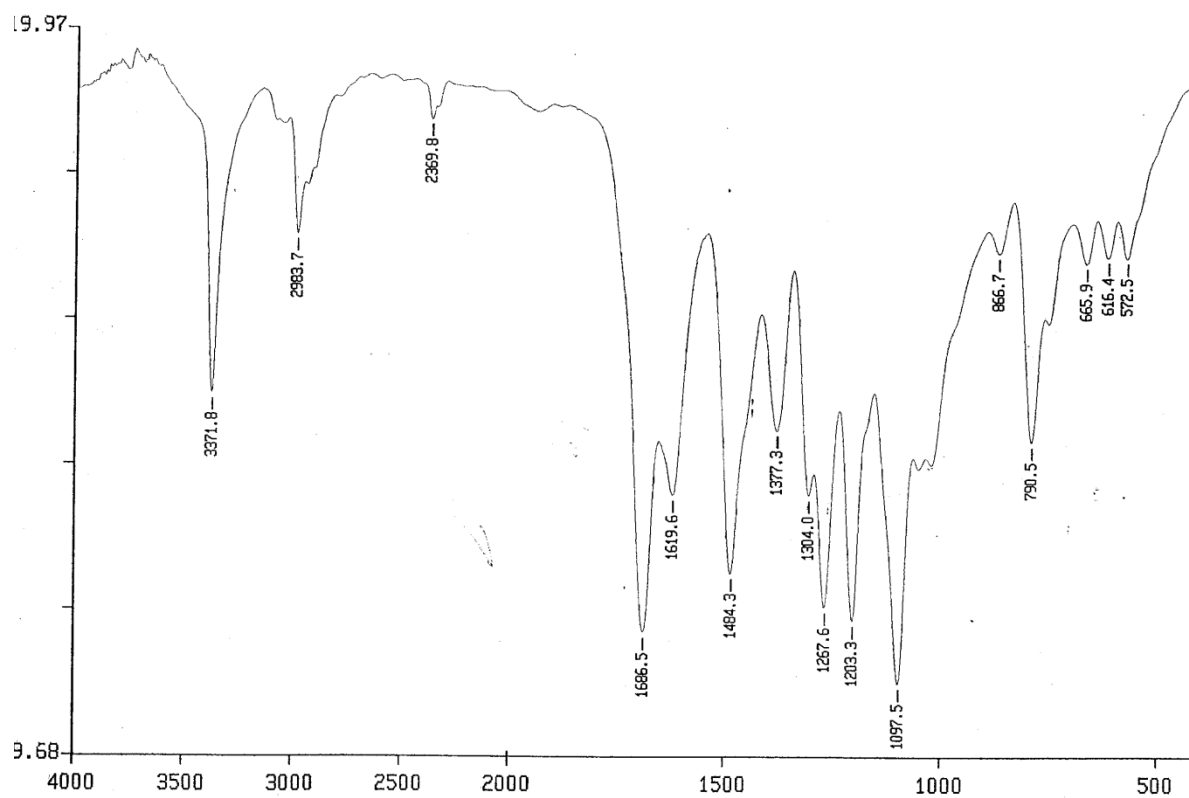

FT-IR of compound 5o

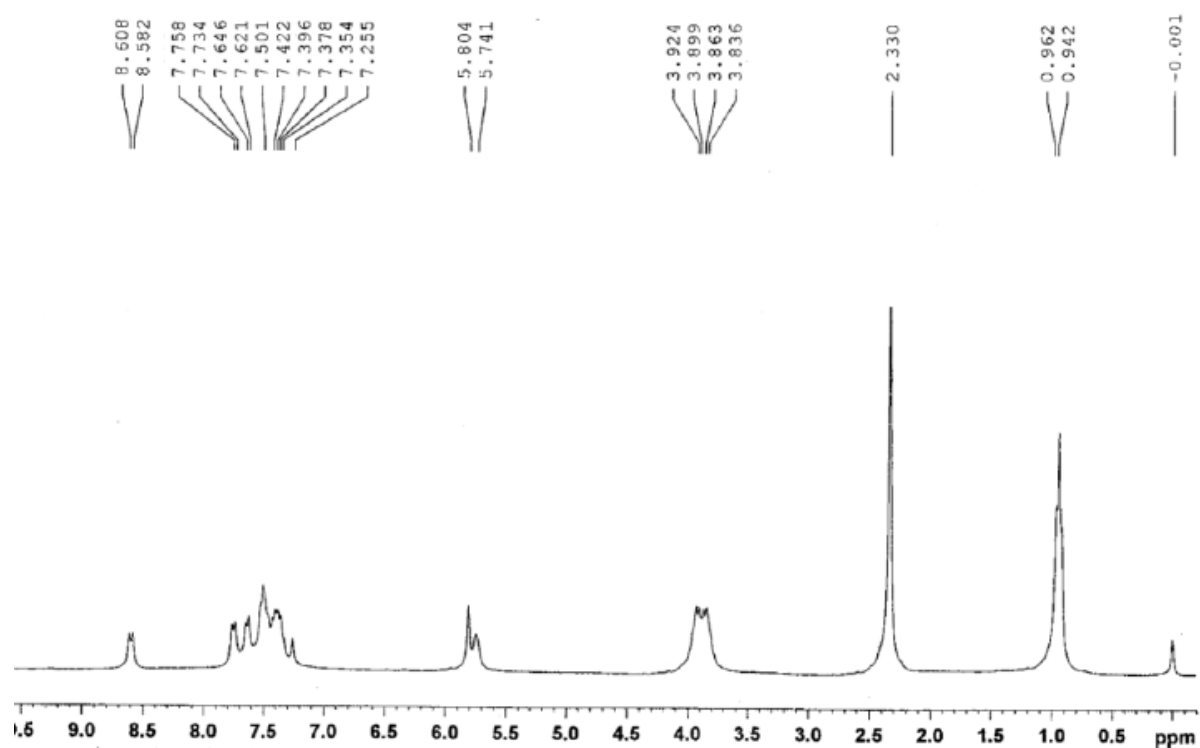<sup>1</sup>H NMR of compound 5o



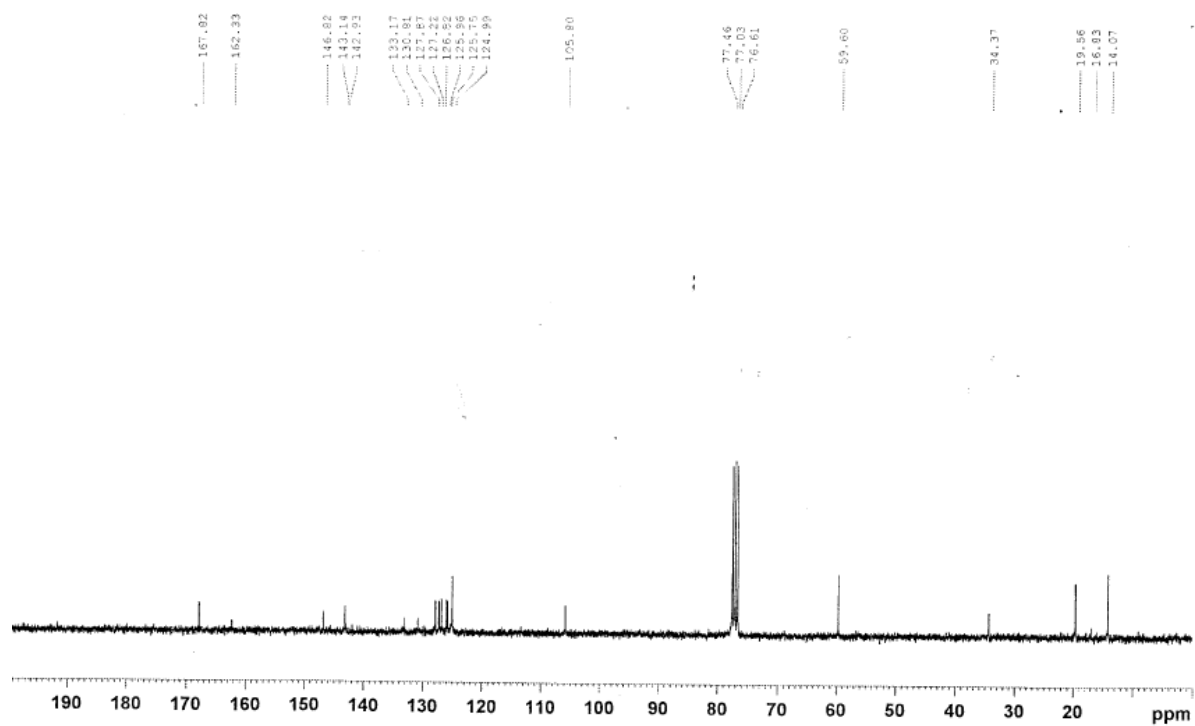

<sup>13</sup>C NMR of compound 5o

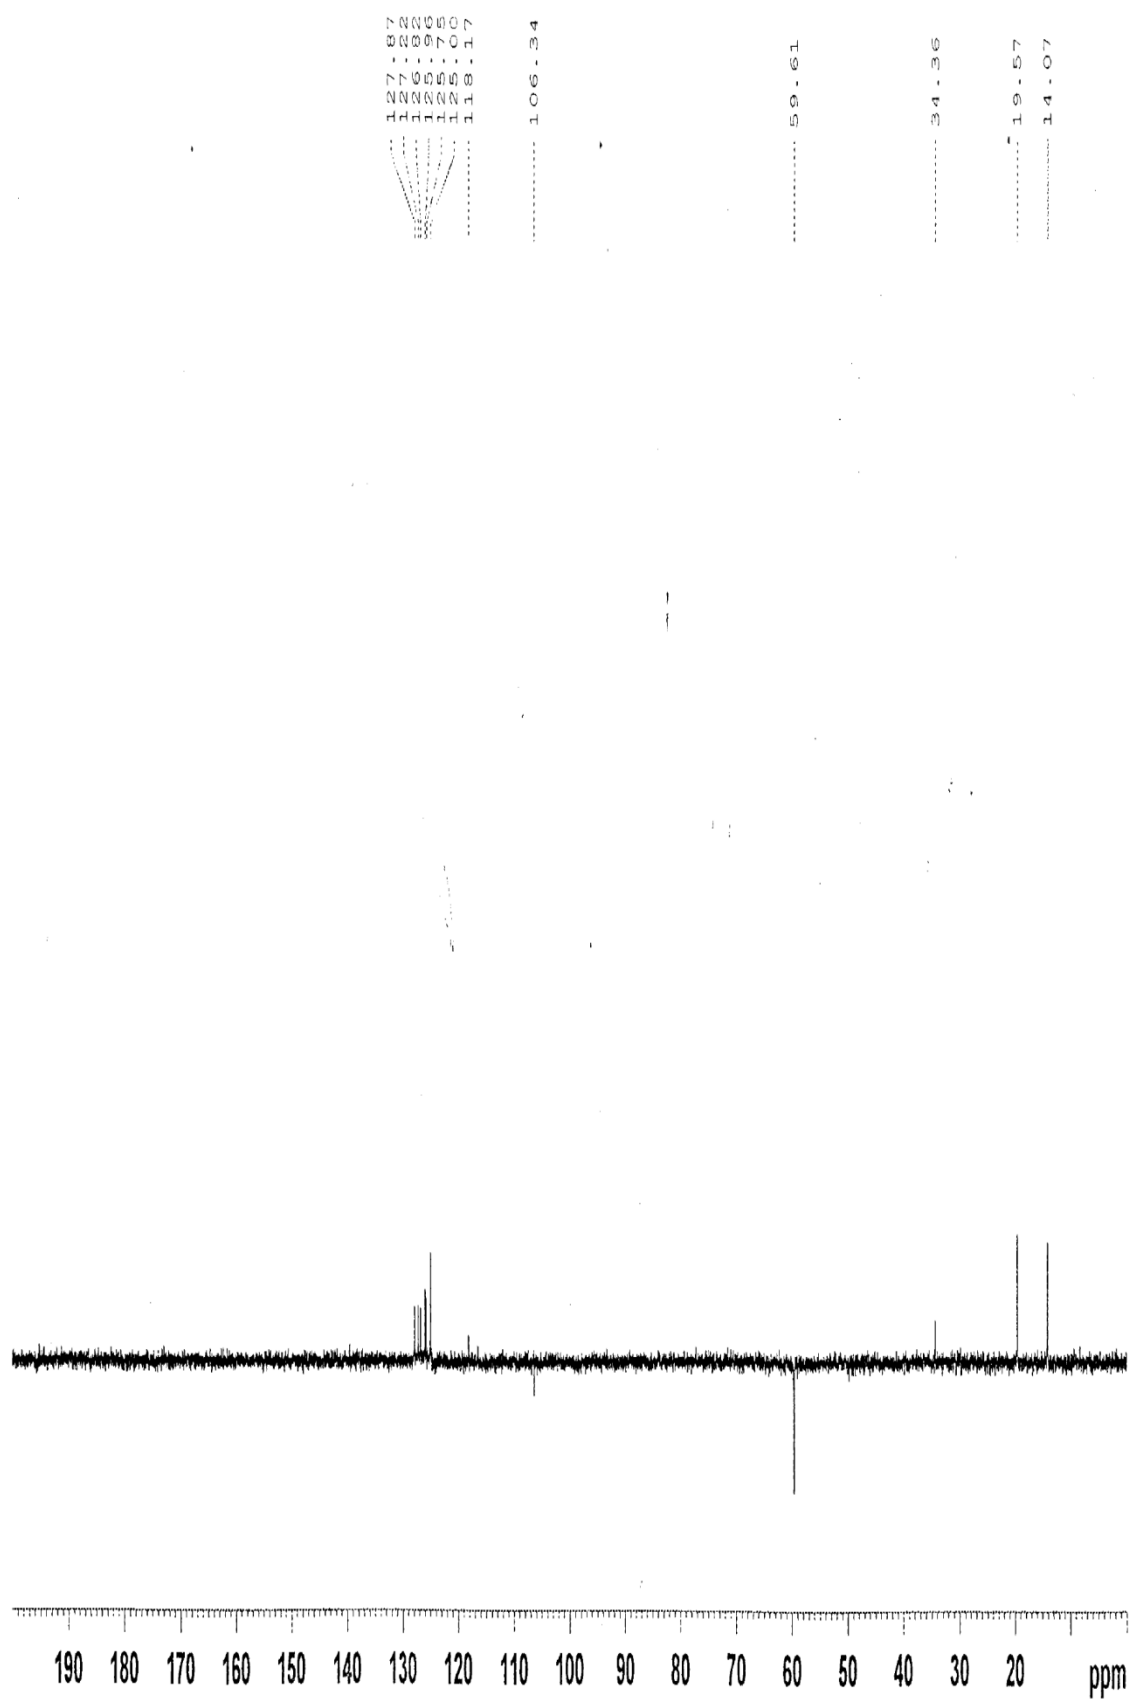

DEPT NMR of compound 5o
